# Supplementary material for: Generalized and social anxiety disorder interactomes show distinctive overlaps with striosome and matrix interactomes
Source: Sci Rep. 2021 Sep 15;11:18392. doi: 10.1038/s41598-021-97418-w (PMC8443595; doi:10.1038/s41598-021-97418-w)
Supplement: Supplementary file 2 — Supplementary Information 2. [file 41598_2021_97418_MOESM2_ESM.xlsx]

## Sheet: Title page
Generalized and social anxiety disorder interactomes show distinctive overlaps with striosome and matrix interactomes
Kalyani B. Karunakaran1, Satoko Amemori2, N. Balakrishnan1, Madhavi K. Ganapathiraju3,4* and Ken-ichi Amemori2*
1Supercomputer Education and Research Centre, Indian Institute of Science, Bangalore, India
2Institute for the Advanced Study of Human Biology, Kyoto University, Kyoto, Japan
3Department of Biomedical Informatics, School of Medicine, and 4Intelligent Systems Program, School of Computing and Information, University of Pittsburgh, Pittsburgh, USA
*Correspondence to: Ken-ichi Amemori (amemori.kenichi.7s@kyoto-u.ac.jp), Madhavi K. Ganapathiraju (madhavi@pitt.edu)
This file contains the list of protein-protein interactions (PPIs) from:
1. The generalized anxiety disorder (GAD) interactome
2. The obsessive-compulsive disorder (OCD) interactome
3. The panic disorder interactome
4. The post-traumatic stress disorder (PTSD) interactome
5. The social anxiety disorder (SAD) interactome
6. The specific phobia interactome

## Sheet: GAD-PPIs
Protein 1	Protein 2
SECISBP2L	DYNLL2
KRTAP5-9	RGS20
KRTAP5-9	MEOX2
KRT40	TRIM42
TRIM42	CCDC36
ATP12A	NPY
ATP12A	GNAI3
EFHC2	TRIM42
NDUFS4	UBE2G2
HMBOX1	DYNLL2
CRBN	OSR1
REEP5	ARFGAP1
REEP5	VKORC1
REEP5	RABAC1
TXN2	KRT40
TXN2	AGTRAP
TXN2	THAP1
TXN2	UCHL5
SERPINB5	TBP
SERPINB5	UCHL5
MAGEA3	CASP12
MAGEA3	TRIM28
USP14	COPS5
KMT2A	SVIL
KMT2A	HIST1H3A
KMT2A	SET
KMT2A	TP53
BAG6	UBQLN4
BAG6	SEC61A1
BAG6	TOMM20
BAG6	PELP1
BAG6	DNAJB11
KRT31	INPP5K
KRT31	TSG101
KRT31	SMARCE1
KRT31	PIN1
GCKR	TRAF2
IDE	UBC
IDE	UCHL5
IDE	INS
ADA	PIAS2
ADA	NR3C1
ADA	GRB2
ADA	ADORA2A
MYO5A	BMF
MYO5A	DLGAP1
MYO5A	DYNLL2
MYO5A	DYNLL1
MTNR1B	SREBF2
MTNR1B	SMARCD1
MTNR1B	PRKDC
MTNR1B	UBQLN4
MTNR1B	TRIM24
MTNR1B	YWHAB
MRPL28	HMBOX1
MRPL28	BANP
PTMS	RXRB
NPY	UBQLN1
NPY	BAG6
NPY	NR1H2
NPY	NPFFR2
NPY	NPFF
NPY	GHRL
NPY	NPY5R
NPY	PMCH
NPY	NPY2R
NPY	NPY1R
NPY	PPYR1
TPO	DUOX1
TPO	TXNDC11
SLC25A4	PPID
SLC25A4	BAX
SLC25A4	AR
SLC25A4	PRKCE
SLC25A4	NR3C1
CREB3L1	SLC30A8
SLC6A3	TGFB1I1
SLC6A3	STX1A
SLC6A3	GNB2L1
MTUS2	TRIM42
MTUS2	TXN2
THAP10	DYNLL2
DNAL4	DYNLL2
KRTAP3-2	TRIM42
PSMD9	RIN3
PSMD9	TRIM42
PSMD9	CCDC136
PSMD9	TRIM39
PSMD9	BANP
PSMD9	NCKIPSD
PSMD9	AHCYL1
PSMD9	ELSPBP1
PSMD9	TNIP2
PSMD9	YY1
PSMD9	SKP2
PSMD9	TCF3
GPRIN2	RHOU
GPRIN2	BCAP31
GPRIN2	DYNLL2
ZBTB48	RGS2
TXNDC11	DUOX1
GLUL	CRBN
GLUL	NFKB1
GLUL	PIAS2
GLUL	UBE2I
GLUL	HTR2A
GLUL	DYNLL1
CPT1A	UBC
CPT1A	HSPA5
CPT1A	NR4A1
ITM2B	CREB3
PSMC6	UBC
PSMC6	PSMD9
GJA1	CREB3
GJA1	UBQLN4
GJA1	CNST
GJA1	SGSM3
GJA1	GJA5
GJA1	MAPK7
GJA1	MAPK3
GJA1	TJP1
GJA1	SRC
GJA1	PRKCG
GJA1	PRKCE
GJA1	PRKCB
GJA1	PRKCA
GJA1	MAPK1
GJA1	S100A1
GJA1	GJA3
GJA1	NOV
HNRNPA1	HIST1H3A
HNRNPA1	SRPK2
HNRNPA1	PSMD9
HNRNPA1	SRPK1
HNRNPA1	NR0B2
HNRNPA1	RNF14
HNRNPA1	PRKDC
CLTA	RGS2
CLTA	EGFR
CLTA	HSPA8
ERP29	UBQLN4
POU2F2	TBP
ATP5C1	PTEN
ATP5C1	PAWR
ATP5C1	EGFR
MAOA	NDRG1
GJA3	TJP1
GJA3	PRKCG
GCK	PFKFB3
GCK	PCNA
GCK	GCKR
GCK	PFKFB2
GCK	INS
KAT5	KRT40
KAT5	HMBOX1
KAT5	CCDC136
KAT5	MTUS2
KAT5	NINL
KAT5	LRIF1
KAT5	KIAA1377
CENPB	NR3C1
CENPB	PIN1
CENPB	SMN1
FTH1	NCOA4
FTH1	HSPB1
FTH1	KPNA2
FTH1	GRB2
FTH1	NR3C1
A2M	NOS3
A2M	APP
A2M	SMN1
A2M	RAP1B
A2M	HMOX2
A2M	GRB2
A2M	HSPA5
A2M	CTSE
A2M	CTSB
RHOU	BNIPL
GNB1	NR3C1
GNB1	GNB2L1
GNB1	MTNR1B
GNB1	MTNR1A
ETS1	DNMT3L
ETS1	TBP
ETS1	NCL
ETS1	SRA1
ETS1	UBE2I
ETS1	STAT5B
ETS1	MAPK7
ETS1	MAPK3
ETS1	MAPK1
ETS1	POU1F1
ETS1	JUN
ETS1	ETS2
ETS1	NFKB1
ETS1	NR3C1
ETS1	NCOR1
ETS1	SRC
ETS1	SMAD3
CREB1	DNMT3L
CREB1	DAXX
CREB1	SRA1
CREB1	YY1
CREB1	PPP1CA
CREB1	POU2F1
CREB1	HDAC1
CREB1	UBE2I
CREB1	SREBF2
CREB1	PRKACA
CREB1	TP53
CREB1	SMARCA4
CREB1	PRKG1
CREB1	MAPK14
CREB1	CREBBP
CREB1	RPS6KA3
CREB1	NR3C1
CREB1	KAT5
PSEN1	UBQLN1
GLP1R	RTN4
GLP1R	GNAS
GLP1R	TMBIM6
GLP1R	STMN1
GLP1R	ERP29
ARF1	HTR2A
ARF1	ARFGAP1
ARF1	COPB1
ARF1	EEF1G
ARF1	INSR
NRAS	RAF1
CD74	HLA-DQB1
GNAZ	RGS20
GNAZ	PRKCD
KRT8	KRT40
KRT8	KRT31
KRT8	MAPK3
KRT8	MAPK8
KRT8	MAPK1
KRT8	KRT18
KRT8	RAF1
IGF1R	PCNA
IGF1R	RELA
IGF1R	DUSP21
IGF1R	GIPC1
IGF1R	YWHAB
IGF1R	SRC
IGF1R	INS
IGF1R	UBC
IGF1R	GNB2L1
IGF1R	MAP3K5
IGF1R	MDM2
IGF1R	JAK2
IGF1R	INSR
IGF1R	STAT3
IGF1R	PRKCD
HMOX2	LMNA
HMOX2	MTNR1A
HMOX2	INPP5K
HMOX2	LRIF1
HMOX2	COPS6
HMOX2	KIAA1377
HMOX2	GIT1
POU2F1	PRKDC
POU2F1	PRKACA
POU2F1	RARA
POU2F1	NCOR2
POU2F1	TBP
POU2F1	RELA
POU2F1	STAT5B
POU2F1	STAT5A
CDC27	COMT
CDC27	PTEN
CDC27	CKS1B
CDC27	RB1
CDC27	SMAD3
CDC27	PIN1
CDC27	PPP5C
HSPD1	PTEN
HSPD1	KRT40
HSPD1	RGS20
HSPD1	KRT31
HSPD1	KRTAP5-9
HSPD1	MAPK6
HSPD1	SUMO4
HSPD1	PRKACA
HSPD1	PRNP
LMNA	SLC30A8
LMNA	CMTM5
LMNA	VKORC1
LMNA	RTN4
LMNA	AGTRAP
LMNA	DDX24
LMNA	TRIM39
LMNA	ARL6IP1
LMNA	RABAC1
LMNA	CREB3
LMNA	RANBP9
LMNA	ITM2B
LMNA	PIAS2
LMNA	PRNP
LMNA	PCNA
LMNA	SRPK2
LMNA	UCHL5
LMNA	RB1
LMNA	PRKCA
LMNA	SVIL
LMNA	SUMO4
LMNA	SMAD3
LMNA	UBE2I
LMNA	KAT5
CKS1B	TCF4
CKS1B	KRTAP5-9
CKS1B	HSP90AA1
CKS1B	PSMD9
CKS1B	SKP2
MSX2	PIAS2
CTSE	BAG6
CTSE	INS
COMT	GLP1R
COMT	MTNR1A
COMT	KRT40
COMT	KRT31
COMT	KRTAP5-9
COMT	VKORC1
COMT	RGS2
COMT	ACE
COMT	LITAF
COMT	TRIP13
COMT	XRN2
UBC	UBQLN4
UBC	VHL
UBC	USP48
UBC	USP14
UBC	NCOA6
UBC	TMEM132A
UBC	TRIM39
UBC	NEDD4L
UBC	UBE3A
UBC	UCHL5
UBC	UBQLN1
UBC	UBE2G2
UBC	TNIP2
UBC	BFAR
UBC	TRIM28
UBC	SQSTM1
UBC	STUB1
UBC	BECN1
UBC	ANKS1B
UBC	PPARGC1A
UBC	HDAC6
UBC	YWHAB
NPFF	NPFFR2
PPID	S100A1
DYNLL2	CCDC36
DYNLL2	C12orf40
DYNLL2	MORN3
EEF1B2	VHL
EEF1B2	EEF1G
LIG1	RGS2
LIG1	PCNA
CEBPA	PPP2CA
CEBPA	ZBTB16
CEBPA	RARA
CEBPA	SKP2
CEBPA	UBE3A
CEBPA	SRA1
CEBPA	XRCC6
CEBPA	SMARCA2
CEBPA	SMARCA4
CEBPA	MAPK8
CEBPA	SMAD3
CEBPA	ESR1
CEBPA	NCOA6
CEBPA	CREBBP
CEBPA	MYC
CEBPA	CEBPB
CEBPA	RB1
CEBPA	NR3C1
CEBPA	MSX2
PRDX3	SUMO4
TRIP13	MORN3
TRIP13	KRTAP3-2
TRIP13	GPRIN2
CPE	LRIF1
CPE	PMCH
CPE	INS
GNAO1	RGS20
GNAO1	TSHR
ITPR1	PRKCD
ITPR1	PRKG1
ITPR1	AHCYL1
ITPR1	HOMER3
ITPR1	PRKACA
CYCS	KRT40
GNAI1	PTEN
GNAI1	GNB2
GNAI1	GNB1
GNAI1	HTR2A
GNAI1	IGF1R
GNAI1	GNAO1
GNAI1	MTNR1B
GNAI1	MTNR1A
GNAI1	RGS20
GNAI1	TSHR
DPH1	UBC
DPH1	HSPA5
EEF1G	UCHL5
EEF1G	EGFR
EEF1G	MTNR1A
EEF1G	NDRG1
EEF1G	HMOX2
BNIP2	LMNA
BNIP2	CREB3
BNIP2	BNIPL
NME3	UBQLN1
NME3	SGTA
NME3	UBQLN4
TCF3	TFPT
TCF3	UBE2I
PPP3CC	TGFBR1
LITAF	UBQLN1
LITAF	BAG3
TADA2A	TCF3
SOD1	UBE3A
SOD1	PARK7
PPP3CA	FKBP8
PPP3CA	PRKCZ
PPP3CA	SOD1
CRH	KRT31
CRH	CRHR1
BMF	DYNLL2
ERN1	NMI
ERN1	STUB1
ERN1	SRPK2
ERN1	USP14
ERN1	PSEN1
ERN1	HSP90AA1
ERN1	HSPA5
ERN1	SYVN1
ERN1	TNFRSF1A
ERN1	COPS5
ERN1	TAOK3
ERN1	MAP3K5
ERN1	TRAF2
PRKCSH	RGS2
GNAI2	PTEN
GNAI2	KRT40
GNAI2	RGS20
GNAI2	TRIP6
GNAI2	KRT31
GNAI2	GNB2
GNAI2	GNB1
GNAI2	MTNR1A
GNAI2	IGF1R
GNAI2	SVIL
GNAI2	MTNR1B
GNAI2	TSHR
GRIA1	NEDD4L
GRIA1	GRIP1
GRIA1	PRKACA
GRIA1	PRKCA
GRIA1	HSPA5
GRIA1	SQSTM1
PBX1	NEDD4L
PBX1	POU2F1
TOMM20	KIAA1377
STAT3	TDG
STAT3	TRIM28
STAT3	PELP1
STAT3	GNB2L1
STAT3	SUMO4
STAT3	STAT5B
STAT3	STAT5A
STAT3	KAT5
STAT3	NMI
STAT3	TSHR
STAT3	NCOA1
GJA5	UBQLN4
GJA5	PRKACA
PML	MAPK7
PML	NCOA2
PML	PIAS2
PML	UBE3A
PML	BANP
PML	KAT5
PML	UBE2I
PML	MAPK11
PML	ZBTB16
PML	RARA
PML	TRIM24
PML	SUMO1
PML	TDG
PML	NCOR1
PML	NCOR2
PML	TP53
PML	TGFBR2
PML	TGFBR1
PML	RB1
PML	RELA
PML	STAT3
DYNC1I1	PIN1
DYNC1I1	SMN1
DYNC1I1	DYNLL2
DYNC1I1	DYNLL1
STUB1	TXN2
AKT1	GJA1
AKT1	MTUS2
AKT1	TP53
AKT1	TNFRSF1A
AKT1	BECN1
AKT1	MYC
AKT1	VHL
AKT1	SRPK2
AKT1	PRKCB
AKT1	SERPINB5
AKT1	MAPK8
AKT1	EGFR
AKT1	ITPR1
AKT1	HSPB1
AKT1	BCL2L1
AKT1	RARA
AKT1	STK3
AKT1	APP
AKT1	PPP1CA
AKT1	EEF1G
AKT1	NCOA4
AKT1	CALM1
AKT1	SKP2
AKT1	CREBBP
AKT1	SMARCC1
AKT1	SMARCB1
AKT1	NCOR2
AKT1	PIAS2
AKT1	MAPK14
AKT1	PPP2CA
AKT1	HSP90AB1
AKT1	BAD
AKT1	MAP3K5
AKT1	CASP9
AKT1	PTEN
AKT1	CASP3
AKT1	AR
AKT1	XIAP
AKT1	SRC
AKT1	PRKCZ
AKT1	PFKFB2
AKT1	MDM2
AKT1	RAF1
AKT1	NOS3
AKT1	HSP90AA1
AKT1	NR4A1
AKT1	ESR1
AKT1	SMAD3
AKT1	YBX1
AKT1	BCL2L11
AKT1	CREB1
AKT1	PAK1
AKT1	PRKDC
AKT1	BRCA1
BRCA1	SQSTM1
BRCA1	SKP2
BRCA1	NCOA1
BRCA1	ITPR1
BRCA1	KAT5
BRCA1	NRIP1
BRCA1	PSMD9
BRCA1	LCK
BRCA1	CSNK1D
BRCA1	HNRNPD
BRCA1	TRIM24
BRCA1	HSPD1
BRCA1	DDX24
BRCA1	RANBP9
BRCA1	UBE2K
BRCA1	UBE2I
BRCA1	SUMO1
BRCA1	UBC
BRCA1	ETS1
BRCA1	UBE3A
BRCA1	PRKDC
BRCA1	HSPA8
BRCA1	NCOA3
BRCA1	NCOA2
BRCA1	SMARCA2
BRCA1	MED1
BRCA1	UBB
BRCA1	SMAD3
BRCA1	PPP1CA
BRCA1	YY1
BRCA1	POU2F1
BRCA1	STAT3
BRCA1	UBE2L3
BRCA1	NMI
BRCA1	SMARCA4
BRCA1	STAT5A
BRCA1	HDAC1
BRCA1	KPNA2
BRCA1	CASP3
BRCA1	CREBBP
BRCA1	TP53
BRCA1	MYC
BRCA1	RB1
BRCA1	JUNB
BRCA1	JUN
BRCA1	RELA
BRCA1	NFKB1
BRCA1	JAK2
BRCA1	ESR1
BRCA1	CDK2
BRCA1	CDK1
STMN1	MAPK3
STMN1	PRKACA
STMN1	STAT3
STMN1	UBQLN4
GNB2	MTNR1B
GNB2	NR3C1
GNB2	STAT5A
GNB2	SVIL
GNB2	RAF1
GNB2	TGFBR1
HNRNPD	MYC
HNRNPD	PRDX3
HNRNPD	HNRNPU
HNRNPD	VHL
HNRNPD	MEOX2
HNRNPD	MAPK6
HNRNPD	HSPB1
HNRNPD	UBE2I
HNRNPD	YBX1
HNRNPD	SUMO4
HNRNPD	PCSK7
HNRNPD	PRKACA
KRT18	TXNDC11
KRT18	SMARCD1
KRT18	TXN2
KRT18	YWHAB
KRT18	RPS6KA3
KRT18	PRKCE
KRT18	PRKCA
KRT18	SVIL
KRT18	RAF1
KRT18	YWHAH
NTF3	NTRK2
NTF3	NTRK3
ESR1	DNMT3L
ESR1	SERPINB5
ESR1	PSMC3IP
ESR1	SET
ESR1	PRKCSH
ESR1	PPP1CA
ESR1	NSF
ESR1	NCL
ESR1	KRT18
ESR1	KRT8
ESR1	HSPB1
ESR1	HNRNPD
ESR1	HNRNPA1
ESR1	TCERG1
ESR1	GNB2L1
ESR1	SKP2
ESR1	RANBP9
ESR1	HSPA8
ESR1	PPP5C
ESR1	SRA1
ESR1	MED25
ESR1	LRIF1
ESR1	GRIP1
ESR1	HDAC1
ESR1	MED14
ESR1	PIAS2
ESR1	SVIL
ESR1	DAP3
ESR1	POU2F2
ESR1	PPID
ESR1	FKBP4
ESR1	SMARCD1
ESR1	PTEN
ESR1	NCOA4
ESR1	DDX54
ESR1	ZBTB16
ESR1	PRPF6
ESR1	PELP1
ESR1	NCOA2
ESR1	HSP90AB1
ESR1	PTGES3
ESR1	RNF14
ESR1	NCOA6
ESR1	NR0B2
ESR1	PPARGC1A
ESR1	MED1
ESR1	TRIM24
ESR1	SMARCA4
ESR1	SMARCE1
ESR1	NCOA1
ESR1	PAK1
ESR1	NRIP1
ESR1	NCOA3
ESR1	STAT5A
ESR1	TDG
ESR1	NCOR1
ESR1	NCOR2
ESR1	TBP
ESR1	SMARCA2
ESR1	RPS6KA3
ESR1	TP53
ESR1	SRC
ESR1	MAPK1
ESR1	JUN
ESR1	MDM2
ESR1	POU2F1
ESR1	LCK
ESR1	HSP90AA1
ESR1	KAT5
ESR1	CHD9
ESR1	UBE2I
ESR1	COPS5
ESR1	RARA
ESR1	STUB1
ESR1	SMAD3
ESR1	BCAR1
ESR1	MAPK3
ESR1	PRKACA
ESR1	RELA
ESR1	NFKB1
ESR1	IGF1R
ESR1	GNAI1
ESR1	GRB2
ESR1	TRIM28
ESR1	JUNB
ESR1	KDM5A
ESR1	YWHAH
NCAM1	PPP1CA
NCAM1	PRNP
BDNF	RHOU
BDNF	INPP5K
BDNF	JUNB
BDNF	F11R
BDNF	AGO3
BDNF	CADPS2
BDNF	SORT1
BDNF	CPE
BDNF	MBTPS1
BDNF	NTRK2
BDNF	NOS3
BDNF	NTF3
BDNF	ESR1
BDNF	NCAM1
NOS3	TXNDC11
NOS3	PSEN1
NOS3	PPP2R5A
NR3C2	NCOA1
NR3C2	RABAC1
NR3C2	SUMO1
NR3C2	UBE2I
NR3C2	TRIM24
NR3C2	PTGES3
CRHR1	SRPK1
CRHR1	GNAS
CRHR1	GNAO1
CRHR1	GNAI1
CRHR1	UCN3
CRHR1	GNAQ
CRHR1	UCN
TJP1	F11R
ARFGAP1	KRTAP3-2
SRPK2	TXN
SRPK2	PTPN22
SRPK2	CADPS2
SRPK2	BCLAF1
SRPK2	BAG3
SRPK2	HOMER3
SRPK2	TNIP2
SRPK2	YWHAB
SRPK2	AHCYL1
DOCK3	NR3C1
DOCK3	SRPK2
DOCK3	PSEN1
UBQLN1	SIL1
UBQLN1	GHRL
UBQLN1	UBQLN4
ARL6IP1	RTN4
ARL6IP1	INPP5K
IGHM	SMN1
IGHM	UBQLN4
MTNR1A	MPDZ
MTNR1A	BAG6
MTNR1A	UBQLN1
MTNR1A	YWHAB
MTNR1A	SLC6A3
MTNR1A	GNB2L1
MTNR1A	MTNR1B
PPP5C	VHL
PSME3	TXN2
STK3	TFPT
HSPBP1	LRIF1
BID	AHCYL1
BID	CRMP1
BID	TUBB2B
BID	CAPN2
BID	CASP3
BID	CASP8
BID	YWHAB
GNAS	MTNR1B
GNAS	GNB1
GNAS	TSHR
GNAS	RGS2
KCNJ6	KCNJ9
ID2	RHOU
ID2	VHL
ID2	RIN3
ID2	NR0B2
ID2	MAPK8
ID2	MAPK3
ID2	MAPK1
ID2	LRIF1
ID2	TCF3
ID2	PPP1CA
ID2	RB1
ID2	TCF4
INSR	STUB1
INSR	SQSTM1
INSR	KRT31
INSR	MAPK3
INSR	YWHAB
INSR	PRKCD
INSR	PRKCA
INSR	VAV1
INSR	RAF1
INSR	GNB2L1
INSR	STAT5B
INSR	STAT5A
INSR	SRC
INSR	JAK2
GNA15	RGS2
GNA15	PRKCA
GNA11	MTNR1A
GNA11	HTR2A
GNA11	TSHR
TCF4	UBE2I
TCF4	TP53
TCF4	TCF3
MC4R	PRKACA
MC4R	NPY
CAPN2	MAPK1
CAPN2	CASP9
ONECUT1	NR0B2
DNAJB11	UBQLN4
DNAJB11	SUMO4
BAX	BCL2L12
BAX	TP53
BAX	YWHAB
BAX	CRYAB
BAX	PARK7
BAX	BCL2
BAX	PPP1CA
BAX	ERN1
BAX	BCL2L1
BAX	BBC3
BAX	BID
BAX	MOAP1
BAX	PMAIP1
BAX	BCL2L10
BAX	SFN
NFKB2	TNIP2
NFKB2	RELA
PMAIP1	ZBTB16
BNIP3L	LMNA
BNIP3L	GNB5
BNIP3L	EWSR1
NFKB1	TP53BP2
NFKB1	DNMT3L
NFKB1	PELP1
NFKB1	COPS5
NFKB1	COPB2
NFKB1	YY1
NFKB1	PML
NFKB1	SF1
NFKB1	ZBTB9
NFKB1	NCOA6
NFKB1	NCOA1
NFKB1	PRKACA
NFKB1	NCOR2
NFKB1	TXN
NFKB1	NFKB2
NFKB1	TNIP2
NFKB1	RELA
NFKB1	KAT5
NFKB1	STAT3
FKBP8	BNIPL
BCL2L11	NDRG1
BCL2L11	GNB2L1
BCL2L11	DYNLL2
BCL2L11	MEX3D
BIK	S100A1
BIK	CREB3
BIK	NR2F2
BNIP3	LMNA
BNIP3	CREB3
BNIP3	BNIP3L
SVIL	TRIP6
SVIL	TGFB1I1
GPHN	DYNLL2
TSHR	RABAC1
BAD	BCL2
BAD	PAK1
BAD	MAPK8
BAD	RAF1
BAD	RPS6KA3
BAD	SFN
BAD	EWSR1
BAD	PPP3CA
BAD	PPP1CA
BAD	BCL2L10
BAD	HRK
BAD	PRKACA
BAD	YWHAB
BAD	YWHAH
BAD	BCL2L1
HIST1H3A	HDAC6
HIST1H3A	TRIM24
HIST1H3A	KAT5
HIST1H3A	PELP1
HIST1H3A	GRIP1
HIST1H3A	NCOR1
HLA-C	YBX1
HLA-C	HSPA5
NR3C1	DTD1
NR3C1	SPIN2A
NR3C1	HIST1H3A
NR3C1	HSP90AB1
NR3C1	RFPL2
NR3C1	KRTCAP3
NR3C1	PRDX3
NR3C1	STRN3
NR3C1	NUP54
NR3C1	ABCC1
NR3C1	LPXN
NR3C1	EFHC2
NR3C1	SHKBP1
NR3C1	FAM161B
NR3C1	TNS4
NR3C1	NR0B2
NR3C1	C1orf94
NR3C1	WTIP
NR3C1	DNMT3L
NR3C1	HDAC1
NR3C1	SGTA
NR3C1	STUB1
NR3C1	TXN2
NR3C1	TMF1
NR3C1	POLR1D
NR3C1	SRA1
NR3C1	RAD54L2
NR3C1	GNB2L1
NR3C1	UBE2L3
NR3C1	NR1H3
NR3C1	KAT5
NR3C1	SRC
NR3C1	NR4A1
NR3C1	OSGEP
NR3C1	HMOX2
NR3C1	MED25
NR3C1	HNRNPA1
NR3C1	HDAC6
NR3C1	LRIF1
NR3C1	SET
NR3C1	ZBTB9
NR3C1	ZNF496
NR3C1	ZBTB3
NR3C1	ZBTB20
NR3C1	MAFF
NR3C1	RBM14
NR3C1	NR2E3
NR3C1	RXRB
NR3C1	PML
NR3C1	MSX2
NR3C1	HMGB2
NR3C1	HMGB1
NR3C1	PIAS2
NR3C1	NCOA4
NR3C1	SVIL
NR3C1	ARPC5
NR3C1	RAN
NR3C1	HSPD1
NR3C1	TADA2A
NR3C1	NEDD4L
NR3C1	NCOA3
NR3C1	MED1
NR3C1	TDG
NR3C1	RANBP9
NR3C1	RAD9A
NR3C1	COPS6
NR3C1	PSMC3IP
NR3C1	DDX54
NR3C1	ZBTB16
NR3C1	ECD
NR3C1	PRPF6
NR3C1	PELP1
NR3C1	NCOA2
NR3C1	UBE2I
NR3C1	KDM5A
NR3C1	PBX1
NR3C1	PTGES3
NR3C1	RNF14
NR3C1	NCOA6
NR3C1	PPARGC1A
NR3C1	STAT5B
NR3C1	ONECUT1
NR3C1	TRIM24
NR3C1	SMARCA4
NR3C1	SMARCE1
NR3C1	SMAD3
NR3C1	HNRNPU
NR3C1	NCOA1
NR3C1	NRIP1
NR3C1	TGFB1I1
NR3C1	DAP3
NR3C1	SUMO1
NR3C1	TRIM28
NR3C1	SMARCD1
NR3C1	SMARCC1
NR3C1	PRKACA
NR3C1	SMARCB1
NR3C1	STAT5A
NR3C1	TSG101
NR3C1	MAPK8
NR3C1	NR3C2
NR3C1	PRKDC
NR3C1	NCOR1
NR3C1	NCOR2
NR3C1	KPNA2
NR3C1	TBP
NR3C1	SMARCA2
NR3C1	MED14
NR3C1	TP53
NR3C1	TXN
NR3C1	MAPK1
NR3C1	POU1F1
NR3C1	PTMS
NR3C1	JUN
NR3C1	RAF1
NR3C1	POU2F2
NR3C1	POU2F1
NR3C1	NCL
NR3C1	RELA
NR3C1	NFKB2
NR3C1	NFKB1
NR3C1	IFNGR2
NR3C1	IDE
NR3C1	HSP90AA1
NR3C1	HSPA1A
NR3C1	RARA
NR3C1	GRIP1
NR3C1	SYT1
NR3C1	LCK
NR3C1	NR2F2
NR3C1	CHD9
NR3C1	UBB
NR3C1	SUMO4
NR3C1	DCAF6
NR3C1	MAPK15
NR3C1	MDM2
NR3C1	STAT3
NR3C1	YWHAH
MED14	PPARGC1A
FCHSD2	MTUS2
PARK2	TP53
PARK2	SQSTM1
PARK2	SUMO1
PARK2	TCF4
PARK2	UBE2G2
PARK2	UBC
PARK2	PARK7
PARK2	STUB1
PARK2	YWHAH
PARK2	RGS2
PARK2	UBB
PARK2	TRIP13
PARK2	UBE2L3
PARK2	43712
XIAP	SQSTM1
XIAP	CDK1
XIAP	BCL2
XIAP	HNRNPA1
XIAP	CKS1B
XIAP	BRCA1
XIAP	MDM2
XIAP	RAF1
XIAP	UBC
XIAP	PTEN
XIAP	43712
XIAP	UBE2I
XIAP	STUB1
XIAP	UBB
XIAP	DYNLL2
XIAP	TGFBR1
XIAP	CASP9
XIAP	CASP7
XIAP	CASP3
FYN	RPS6KA3
FYN	STAT3
FYN	SRC
FYN	SKAP1
FYN	BCAR1
FYN	PXN
FYN	NTRK2
FYN	GNB2L1
FYN	ZAP70
FYN	VAV1
FYN	RAF1
FYN	JAK2
FYN	ITPR1
FYN	HSP90AA1
FYN	NR3C1
FYN	GRB2
FYN	PRKCZ
FYN	PRKCE
FYN	PRKCD
FYN	HRAS
FYN	NCAM1
BCL2	RNF183
BCL2	BCL2L12
BCL2	43712
BCL2	PPARA
BCL2	SQSTM1
BCL2	PPID
BCL2	CDK1
BCL2	PPP3CC
BCL2	BRCA1
BCL2	HNRNPD
BCL2	MEX3D
BCL2	PARK2
BCL2	AVEN
BCL2	CAPN2
BCL2	MOAP1
BCL2	BNIPL
BCL2	BFAR
BCL2	BCLAF1
BCL2	BBC3
BCL2	PPP1CA
BCL2	PMAIP1
BCL2	TP53BP2
BCL2	SPNS1
BCL2	TP53AIP1
BCL2	PPP2CA
BCL2	BNIP3L
BCL2	RTN4
BCL2	BCL2L10
BCL2	BMF
BCL2	BCL2L14
BCL2	FKBP8
BCL2	BECN1
BCL2	ITM2B
BCL2	BAG4
BCL2	BAG3
BCL2	BCL2L11
BCL2	RAD9A
BCL2	HRK
BCL2	BIK
BCL2	BNIP3
BCL2	BNIP2
BCL2	BNIP1
BCL2	MAPK11
BCL2	PKMYT1
BCL2	BID
BCL2	TOMM20
BCL2	CASP8
BCL2	PPP2R5A
BCL2	SF1
BCL2	MAPK8
BCL2	PIN1
BCL2	CASP3
BCL2	SMN1
BCL2	BCL2L1
BCL2	BCAP31
BCL2	BLK
BCL2	TP53
BCL2	KRAS
BCL2	HRAS
BCL2	PRKCA
BCL2	MAPK1
BCL2	RRAS
BCL2	NRAS
BCL2	RAF1
BCL2	PSEN1
BCL2	SOD1
BCL2	ITPR1
BCL2	HSPA1A
BCL2	NR4A1
BCL2	MYC
BCL2	PML
BCL2	PXN
BCL2	NMT2
BCL2	NLRP1
BCL2	CYCS
BCL2	MAPK14
BCL2	MAPK3
BCL2	PRKACA
BCL2	CPT1A
BCL2	CDK2
BCL2	TMBIM6
BCL2	PPP3CA
ATP2A2	MDM2
ATP2A2	S100A1
ATP2A2	BCL2
CREB3	VKORC1
CREB3	CMTM5
CREB3	MAL2
CREB3	COPS5
CREB3	RRAS2
CREB3	RABAC1
CREB3	CREB3L1
OSGEP	ZNF579
BAK1	BCL2
BAK1	TP53
BAK1	ERN1
BAK1	HSPD1
BAK1	BCL2L10
BAK1	BID
BAK1	BAX
BAK1	BCL2L1
CRMP1	RGS2
CRMP1	DNAJB11
CRMP1	SRC
CRMP1	RTN4
CRMP1	TRIP13
CRMP1	HMGB1
CRMP1	FTH1
LPXN	HDAC6
SF1	TCERG1
COPS6	COPS5
BANP	C1orf94
UBE2K	UBB
UBE2K	PARK2
UBE2K	MDM2
UBE2K	NEDD4L
UBE2K	CASP12
UBE2K	UBC
UBE2K	TRIM39
UBE2K	BFAR
UBE2K	UBE2I
UBE2K	NFKB1
UBE2K	TP53
PTEN	BCAR1
PTEN	TXN
PTEN	UBC
PTEN	PARK7
PTEN	STUB1
PTEN	COPS6
PTEN	UBE2I
PTEN	UBE2L3
PTEN	PXN
PTEN	TP53
TSG101	TNIP2
TSG101	UBC
TSG101	AATF
CSNK1D	PPP5C
CSNK1D	SMAD3
CSNK1D	MDM2
CSNK1D	GJA1
CSNK1D	ARFGAP1
CSNK1D	TP53
BCL2L1	RNF183
BCL2L1	MAPK14
BCL2L1	MTNR1B
BCL2L1	PARK2
BCL2L1	CREB3
BCL2L1	HNRNPA1
BCL2L1	TP53BP2
BCL2L1	PARK7
BCL2L1	BLK
BCL2L1	RAF1
BCL2L1	BNIPL
BCL2L1	PSEN1
BCL2L1	NLRP1
BCL2L1	CYCS
BCL2L1	MAPK8
BCL2L1	BCL2L12
BCL2L1	BMF
BCL2L1	BBC3
BCL2L1	BID
BCL2L1	RAD9A
BCL2L1	CRYAB
BCL2L1	MOAP1
BCL2L1	BCLAF1
BCL2L1	PPP1CA
BCL2L1	PMAIP1
BCL2L1	SPNS1
BCL2L1	BNIP3L
BCL2L1	RTN4
BCL2L1	BCL2L10
BCL2L1	BCL2L14
BCL2L1	AVEN
BCL2L1	FKBP8
BCL2L1	BECN1
BCL2L1	BCL2L11
BCL2L1	HRK
BCL2L1	BIK
BCL2L1	BNIP3
BCL2L1	BNIP1
BCL2L1	CASP9
BCL2L1	CASP8
BCL2L1	TMBIM6
BCL2L1	BCAP31
BCL2L1	TP53
HSPB1	YWHAH
HSPB1	SMARCA4
HSPB1	LIG1
HSPB1	HSP90AB1
HSPB1	TRIM24
HSPB1	SMARCA2
HSPB1	NCKIPSD
HSPB1	MRPL28
HSPB1	INPP5K
HSPB1	YWHAB
HSPB1	STUB1
HSPB1	SQSTM1
HSPB1	PTGES3
HSPB1	KRT18
HSPB1	HSP90AA1
HSPB1	BAG3
HSPB1	SMARCD1
HSPB1	INS
HSPB1	UCHL5
HSPB1	LRIF1
HSPB1	CYCS
HSPB1	TP53
HSPB1	TGFB1I1
UBQLN4	C1orf94
UBQLN4	CCDC136
UBQLN4	MOAP1
NMI	KAT5
HDAC6	VKORC1
HDAC6	BBS10
HDAC6	TUBB2B
DRD2	GNB5
DRD2	PAWR
DRD2	SLC6A3
DRD2	CLIC6
DRD2	PPP1R9B
DRD2	NCS1
DRD2	EPB41L1
DRD2	KCNJ9
DRD2	KCNJ6
DRD2	FLNA
DRD2	SSTR5
DRD2	GNAI3
DRD2	GNAI2
DRD2	GNAZ
DRD2	EPB41
DRD2	NSF
DRD2	GRIA2
DRD2	CADPS2
DRD2	CADPS
DRD2	GIPC1
TRIM28	ZNF496
SMARCC1	NCOA1
SMARCC1	SMARCE1
SKP2	YY1
SKP2	VHL
SKP2	YWHAB
SKP2	TCF3
SKP2	UBB
RAF1	BECN1
RAF1	RANBP9
RAF1	YY1
RAF1	STUB1
RAF1	PRPF6
RAF1	RRAS
RAF1	YWHAB
RAF1	RRAS2
RAF1	SRC
RAF1	RB1
RAF1	VAV1
RAF1	STK3
RAF1	YWHAH
SGTA	BCL2L12
SGTA	TNFRSF1A
SGTA	BAG6
SGTA	F11R
CHD3	UBC
CHD3	LRIF1
CHD3	NR4A1
CHD3	NR1H2
CHD3	RGS2
CHD3	CPE
CHD3	TRIM28
CHD3	CREB1
CHD3	TCERG1
CHD3	UBE2I
CHD3	GIT1
CHD3	SUMO1
CHD3	KPNA2
CHD3	TP53
FKBP4	HSPB1
FKBP4	SQSTM1
FKBP4	S100A1
FKBP4	SH3BP4
FKBP4	HSP90AA1
FKBP4	NR3C1
FKBP4	NR3C2
TGFB1I1	NEDD4L
TGFB1I1	MAPK15
TGFB1I1	UBQLN4
TGFB1I1	GIT1
TGFB1I1	TGFBR2
JAK2	MAP3K5
JAK2	TSHR
JAK2	PPP2R5A
JAK2	STAT5A
JAK2	TNFRSF1A
JAK2	VAV1
JAK2	RAF1
JAK2	PPP2CA
JAK2	STAT5B
JAK2	STAT3
NR4A1	TRAF2
NR4A1	NDRG1
NR4A1	STAT3
NR4A1	NFKB1
NR4A1	SMAD3
NR4A1	TCF4
NR4A1	BBS10
NR4A1	RTN4
NR4A1	HSP90AB1
NR4A1	ZNF579
NR4A1	TRIM28
NR4A1	MAPK8
NR4A1	NCOA2
NR4A1	MED1
NR4A1	NCOA1
NR4A1	NCOA3
NR4A1	NCOR2
NR4A1	MAPK1
NR4A1	BCL2L10
NR4A1	VHL
NR4A1	TP53
NR4A1	PML
NR4A1	RPS6KA3
VHL	FKBP8
VHL	GNB2L1
VHL	TRIM28
PSMC3	UBC
PSMC3	UBE3A
PSMC3	PSMD9
PSMC3	PSMC6
PSMC3	UBE2I
PSMC3	NDRG1
PSMC3	PSMC3IP
PSMC3	VHL
TRA	NCOA6
SFN	RAF1
SFN	TP53
SFN	MDM2
SFN	NR3C1
SFN	HNRNPD
SFN	MAP3K5
SFN	GPRIN2
YWHAH	NCOA2
YWHAH	NCOA1
YWHAH	NRIP1
YWHAH	NCOA3
DAPK1	STUB1
DAPK1	ZAP70
DAPK1	NR3C1
DAPK1	PPP2R5A
DAPK1	PPP2CA
DAPK1	BECN1
DAPK1	MDM2
DAPK1	MAPK1
DAPK1	MAPK3
DAPK1	YWHAB
DAPK1	TNFRSF1A
DAPK1	STX1A
EGFR	GNAI3
EGFR	RGS2
EGFR	TXN
EGFR	NTRK2
EGFR	PRKCZ
EGFR	PTPN22
EGFR	NR3C1
EGFR	MAPK8
EGFR	RAF1
EGFR	PRKCE
EGFR	TRAF2
EGFR	YWHAB
EGFR	TNFRSF1A
EGFR	HSP90AB1
EGFR	HSP90AA1
EGFR	PML
EGFR	TNS4
EGFR	ANKS1B
EGFR	ZAP70
EGFR	PRKCB
EGFR	PCNA
EGFR	STUB1
EGFR	HDAC6
EGFR	HSPA1A
EGFR	PPP5C
EGFR	HSPA8
EGFR	FKBP8
EGFR	FKBP4
EGFR	NCAM1
EGFR	STAT5B
EGFR	PRKACA
EGFR	STAT5A
EGFR	TJP1
EGFR	NCK1
EGFR	SRC
EGFR	PRKCD
EGFR	PRKCA
EGFR	VAV1
EGFR	XRCC6
EGFR	KRT18
EGFR	KRT8
EGFR	JAK2
EGFR	GNAI2
EGFR	ESR1
EGFR	EPB41
EGFR	SFN
EGFR	UBB
EGFR	MAPK1
EGFR	PAK1
EGFR	STAT3
EGFR	GRB2
BCAP31	VKORC1
DRD3	USP48
DRD3	RDX
DRD3	CLIC6
DRD3	MPDZ
DRD3	EPB41L2
DRD3	EPB41L1
DRD3	FLNA
DRD3	GNAI1
DRD3	EPB41
DRD3	EEF1B2
DRD3	EEF1G
DRD3	NCK1
DRD3	NCS1
DRD3	GIPC1
DRD3	GRB2
ADRB2	RGS20
ADRB2	STAT3
ADRB2	RGS2
ADRB2	TSG101
ADRB2	RAN
ADRB2	HDAC6
ADRB2	GNB2L1
ADRB2	TSHR
ADRB2	CD4
ADRB2	GNAI2
ADRB2	GNB1
ADRB2	GNAS
ADRB2	MDM2
ADRB2	KCNJ9
ADRB2	KCNJ6
ADRB2	SRC
ADRB2	PRKCD
ADRB2	INSR
ADRB2	GNA15
ADRB2	GNA11
ADRB2	CSK
ADRB2	GRB2
NR0B1	NR3C1
NR0B1	ESR1
NR0B1	NRIP1
NR0B1	AR
YY1	DNMT3L
YY1	NEDD4L
UBB	UBQLN1
UBB	UBE3A
UBB	HDAC6
UBB	STUB1
UBB	SQSTM1
CDK2	SCN5A
CDK2	ESR1
CDK2	PML
CDK2	PIN1
CDK2	PPP2CA
CDK2	XRCC6
CDK2	SMAD3
CDK2	SKP2
CDK2	ID2
CDK2	TP53
CDK2	RB1
CDK2	PCNA
CDK2	CKS1B
CDK2	CEBPA
CDK1	UBE3A
CDK1	STK3
CDK1	EGFR
CDK1	NCL
CDK1	CKS1B
CDK1	SQSTM1
CDK1	PML
CDK1	UBE2I
CDK1	HMGB1
CDK1	TGFBR2
CDK1	KAT5
CDK1	ZBTB16
CDK1	PKMYT1
CDK1	SFN
CDK1	PIN1
CDK1	TP53
CDK1	RB1
CDK1	PCNA
CDK1	STMN1
CDK1	LMNA
CDK1	KRT18
CDK1	ITPR1
CDK1	FYN
CDK1	MYC
EPB41L2	HSPB1
EPB41L2	GRIA1
EPB41L2	YWHAH
EPB41L1	NR3C1
EPB41L1	HSPB1
EPB41L1	SRPK2
EPB41L1	ITPR1
EPB41L1	GRIA1
EPB41L1	YWHAB
CRYAB	SQSTM1
CRYAB	SCN5A
CRYAB	SOD1
CRYAB	INS
CRYAB	BAG3
CRYAB	HSPB1
CRYAB	EPB41
EPB41	PRKCB
EPB41	KPNA2
EPB41	SMAD3
EPB41	YWHAB
MDM2	MYC
MDM2	DDX24
MDM2	RARA
MDM2	SMARCE1
MDM2	SMARCA4
MDM2	SRC
MDM2	SMARCA2
MDM2	SET
MDM2	WT1
MDM2	RELA
MDM2	UBE2L3
MDM2	UBE3A
MDM2	PBX1
MDM2	NCL
MDM2	S100A1
MDM2	PSMC3
MDM2	UBE2I
MDM2	YY1
MDM2	UBC
MDM2	BANP
MDM2	UBE2G2
MDM2	SUMO1
MDM2	TSG101
MDM2	TBP
MDM2	RB1
MDM2	COPS5
MDM2	PSME3
MDM2	MED1
MDM2	UBB
MDM2	UBQLN4
MDM2	TP53
MDM2	KAT5
MDM2	PML
SMN1	ARFGAP1
SMN1	NMT2
SMN1	INPP5K
SMN1	ZBTB16
SMN1	LRIF1
SMN1	BAG6
SMN1	COPS6
SMN1	TP53
STX1A	SYTL4
STX1A	SYT1
SLC6A4	STX1A
HTR2A	PPP5C
HTR2A	NDUFB10
HTR2A	NME3
HTR2A	RPS6KA3
HTR2A	JAK2
HTR2A	MAP1A
HTR2A	PON2
HTR2A	MRPL28
HTR2A	NTRK3
HTR2A	EIF3F
HTR2A	ANKS1B
TRIM23	UBE2L3
TRIM23	GAD1
TRIM23	UBC
TRIM23	TRIM42
TRIM23	ARFGAP1
TRIM23	KAT5
TRIM23	PIAS2
TRIM23	MDM2
TRIM23	BAG1
TRIM23	UBE2I
TRIM23	TSG101
TRIM23	SF1
NSF	KIAA1377
NSF	STX1A
HOMER3	DYNLL2
SRPK1	TP53
SRPK1	AHCYL1
NEDD4L	AATF
NEDD4L	DDX54
ARF6	HTR2A
ARF6	EGFR
RPN1	SMARCB1
RPN1	UBC
RPN1	UBQLN1
RPN1	SGTA
RPN1	UBQLN4
CSK	EGFR
CSK	ZAP70
CSK	JUN
CSK	TGFB1I1
CSK	MAPK15
CSK	PTPN22
CSK	PXN
CSK	PRKACA
CSK	SRC
CSK	LCK
CSK	INSR
CSK	IGF1R
CSK	FYN
CSK	GJA1
RXRB	KRT40
RXRB	TP53BP2
RXRB	NR1H3
RXRB	NRIP1
RXRB	NR0B2
RXRB	NR2E3
RXRB	NCOA1
RXRB	NCOA3
RXRB	NR1H2
ZBTB16	KRT40
ZBTB16	NCOR1
ZBTB16	NCOR2
ZBTB16	HDAC6
UBE3A	UCHL5
UBE3A	UBQLN1
NR0B2	HDAC6
NR0B2	NR1H3
MAPK7	RAF1
MAPK7	YWHAB
NCOA4	RNF14
NR1H2	DNMT3L
NR1H2	RHOU
NR1H2	NCOA1
NR1H2	YY1
NR1H2	BAG6
NR1H2	NRIP1
NR1H2	NCOR1
NR1H2	NCOA3
NR1H2	NCOA6
NR1H2	NCOR2
NR1H2	NR0B2
TRAF2	BECN1
TRAF2	TRIM42
TRAF2	MORN3
TRAF2	RRAS2
TRAF2	PIAS2
TRAF2	UBC
TRAF2	UBQLN4
TRAF2	BANP
TRAF2	ZBTB16
TRAF2	NRIP1
TRAF2	TAOK3
KDM5A	TBP
SMARCB1	CCDC36
SMARCB1	BCL2L11
SMARCB1	NR0B2
SMARCB1	SMARCE1
SMARCB1	SMARCC1
SMARCB1	UBQLN4
SMARCB1	TP53
SMARCB1	SRC
RAN	BCAR1
RAN	SMARCB1
RAN	KIAA1377
RAN	TGFBR1
RAN	GIT1
RAN	RANBP9
RAP1B	RGS2
RAP1B	LRIF1
RAP1B	TP53
TRIM24	TRIM28
NR2F2	NCOR2
NR2F2	TRIM24
NR2F2	SQSTM1
NR2F6	NCOA1
NR2F6	NR3C1
NR2F6	ESR1
NR2F6	NR2F2
RAB2A	RGS2
RANBP9	COPS5
RANBP9	NCOA6
GIPC1	SH3BP4
KRAS	SERPINB5
KRAS	RAF1
RELA	TP53
RELA	DNMT3L
RELA	TCF4
RELA	UBE2L3
RELA	KAT5
RELA	NCOA6
RELA	TP53BP2
RELA	NCOR2
RELA	TBP
RELA	AATF
RELA	NCOA3
RELA	TNIP2
RELA	STAT3
SMARCE1	KRT40
SMARCE1	CCDC136
SMARCE1	MTUS2
SMARCE1	NR0B2
SMARCE1	NCOA2
SMARCE1	NCOA1
SMARCE1	NCOA3
SMARCE1	SRC
EWSR1	JUN
EWSR1	TRAF2
EWSR1	ECD
EWSR1	SF1
EWSR1	PRKCA
EWSR1	NDRG1
EWSR1	NINL
EWSR1	RNF183
EWSR1	CNST
EWSR1	DYNLL2
ADORA2A	DRD2
APP	THAP1
APP	MYC
APP	UBE2I
APP	EGFR
APP	MDM2
APP	JUN
APP	NOS3
APP	USP48
APP	MAPK8
APP	NTRK3
APP	TRIM39
APP	POU2F1
APP	EIF3F
APP	PRKCG
APP	INS
APP	GNA15
APP	BDNF
APP	ETS1
APP	IGF1R
APP	STAT5B
APP	SKAP1
APP	DUSP21
APP	PTMS
APP	EEF1B2
APP	GNB5
APP	PDE1A
APP	KPNA2
APP	ANKS1B
APP	UBE3A
APP	NDUFS4
APP	ARF6
APP	NRIP1
APP	BNIP1
APP	SMARCB1
APP	PPP5C
APP	SRPK1
APP	RNF183
APP	COPS5
APP	COPB1
APP	CTSB
APP	VHL
APP	HMBOX1
APP	IGHM
APP	EPB41L1
APP	VPS29
APP	SRPK2
APP	BCL2L11
APP	MAPK11
APP	TNIP2
APP	SPSB2
APP	NR1H3
APP	PPP3CC
APP	PAK1
APP	GNAZ
APP	PRKCD
APP	YWHAB
APP	NME3
APP	ATP5C1
APP	MAPK7
APP	HNRNPA1
APP	TFPT
APP	CSNK1D
APP	TGFBR2
APP	RAP1B
APP	UCHL5
APP	MRPL28
APP	RASGRP3
APP	BIK
APP	HSPBP1
APP	SMAD3
APP	CD74
APP	KRAS
APP	EPB41L2
APP	NMT2
APP	HMGB2
APP	ARFGAP1
APP	ZAP70
APP	CENPB
APP	DDX54
APP	HSPD1
APP	YY1
APP	LRP2
APP	UBB
APP	UBQLN1
APP	SYVN1
APP	SET
APP	TP53BP2
APP	CASP8
APP	CAV1
APP	CASP3
APP	BCAP31
APP	IDE
APP	HMOX2
APP	CTSD
APP	CALR
APP	GRB2
APP	PSEN1
APP	HOMER3
APP	PPID
APP	PIN1
APP	CRYAB
APP	ITM2B
APP	KAT5
APP	EPB41
PAWR	FBXO45
PAWR	SQSTM1
PAWR	SPSB4
PAWR	SPSB2
PAWR	SPSB1
PAWR	RRAS2
PAWR	TFPT
PAWR	THAP1
PAWR	SLC5A7
PAWR	AATF
PAWR	WT1
PAWR	PML
PAWR	PRKCZ
DAPK3	TP53
DAPK3	MDM2
DAPK3	NEDD4L
DAPK3	AATF
DAPK3	PAWR
DAPK3	DAXX
DAPK3	PRKCZ
SQSTM1	DNAJC10
SQSTM1	RAD54L2
SQSTM1	NCOR1
HSP90AB1	SERPINB5
HSP90AB1	UBE3A
HSP90AB1	PTEN
HSP90AB1	PTGES3
HSP90AB1	SGTA
HSP90AB1	FCHSD2
HSP90AB1	MAPK6
HSP90AB1	DDX24
HSP90AB1	STAT3
HSP90AB1	YWHAB
HSP90AB1	PPID
HSP90AB1	TP53
SYT1	RBM14
SYT1	NR1H3
SYT1	GNB2L1
PRKCG	YWHAB
PRKCG	RGS2
RASGRP3	DYNLL2
PPP2CA	TRIM28
PPP2CA	RRAS
PPP2CA	STAT5B
PPP2CA	MAPK3
PPP2CA	STAT5A
PPP2CA	MAPK1
PPP2CA	RELA
PPP2CA	TRIP13
PPP2CA	SET
PPP2CA	TP53
PPP2CA	PXN
PPP2CA	PRKCD
MEP1B	NPY
MEP1B	PRKACA
MEP1B	PRKCD
GAD2	CMTM5
GAD2	MAL2
GAD2	TMEM159
GAD2	AGTRAP
GAD2	ARL6IP1
GAD2	PRKACA
GAD2	PRKCE
[truncated: 1,518 more rows]

## Sheet: OCD-PPIs
Protein 1	Protein 2
ACTG1	PFN2
ACTG1	CFL1
ACTG1	CFL2
ACTG1	PRSS23
ACTG1	NDRG1
ACTG1	TMSB4X
ACTG1	MAP1A
ACTG1	DYNLL1
ACTG1	ATF7IP
ACTG1	DISC1
ACTG1	RPS6KA5
ACTG1	APOE
ACTG1	PSEN2
ACTG1	BRCA1
ACTG1	HSPB2
ACTG1	SRPK2
ACTG1	BIN1
ERBB2	GRB7
ERBB2	PAK1
ERBB2	PIK3R2
ERBB2	ERBB2IP
ERBB2	ERRFI1
ERBB2	PICK1
ERBB2	GRB2
ERBB2	ESR1
ERBB2	STUB1
ERBB2	UBB
ERBB2	PTPN11
ERBB2	ERBB4
ERBB2	HSP90AA1
ERBB2	JAK2
ERBB2	MUC1
ERBB2	PIK3R1
ERBB2	PLCG1
ERBB2	JUP
ERBB2	SOS1
ERBB2	SRC
ERBB2	ERBB3
ERBB2	HSP90B1
ERBB2	SHC1
ERBB2	PTK2
ERBB2	PTK2B
ERBB2	NRG1
ERBB2	HDAC6
ERBB2	SH2B2
ERBB2	SH2D1B
ERBB2	SOCS1
ERBB2	NCK2
ERBB2	PLCG2
ERBB2	RASA1
ERBB2	STAT3
ERBB2	STAT1
ERBB2	SYK
ERBB2	SHC2
ERBB2	ITK
ERBB2	ANKS1B
ERBB2	DOK4
ERBB2	BLNK
ERBB2	SHC3
ERBB2	PIK3R3
ERBB2	SLA2
ERBB2	SH2D2A
ERBB2	VAV3
ERBB2	SRPK1
ERBB2	GLCE
ERBB2	IL13RA2
ERBB2	KLK5
ERBB2	LYPD3
ERBB2	PSMC3IP
ERBB2	RHOBTB2
ERBB2	HDLBP
ERBB2	PSAP
ERBB2	PTPN6
ERBB2	PPM1A
ERBB2	FGFR4
ERBB2	AURKA
ERBB2	MYC
ERBB2	RAF1
ERBB2	TP53
ERBB2	FBXO7
GRB7	PTK2
GRB7	SHC1
GRB7	ZBTB16
GRB7	TMSB4X
GRB7	MSH2
GRB7	SETDB1
GRB7	KCTD6
GRB7	OLIG1
PAK1	PLCG1
PAK1	RAC1
PAK1	PXN
PAK1	CDK5R1
PAK1	HGS
PAK1	NCK2
PAK1	ARHGEF7
PAK1	MAPK1
PAK1	SMURF1
PAK1	TGFBR1
PAK1	RHOU
PAK1	HIST1H4A
PAK1	PRKCD
PAK1	FRS2
PAK1	YWHAG
PAK1	DYNLL1
PAK1	SHC1
PAK1	RAF1
PAK1	YWHAZ
PAK1	TGM2
PAK1	HIST1H3A
PAK1	DYNLL2
PAK1	PPM1A
PAK1	PPP2CA
PAK1	PPP1CA
DLG4	ERBB2
DLG4	YES1
DLG4	LYN
DLG4	PTPRG
DLG4	PRKCA
DLG4	LRP1
DLG4	HTR2A
DLG4	LPHN1
DLG4	IL13RA1
DLG4	CASK
DLG4	NLGN3
DLG4	NLGN4X
DLG4	HTR2C
DLG4	LRP2
DLG4	MAP3K10
DLG4	MAP1A
DLG4	GRIK5
DLG4	KCNJ4
DLG4	ERBB4
DLG4	KCNJ2
DLG4	PTK2B
DLG4	GUCY1A2
DLG4	DYNLL1
DLG4	KCNJ10
DLG4	GRIN2D
DLG4	SHANK2
DLG4	LIN7A
DLG4	FZD1
DLG4	SEMA4F
DLG4	HGS
DLG4	FZD4
DLG4	AKAP5
DLG4	SHANK1
DLG4	KIF1B
DLG4	ERBB2IP
DLG4	LRRC1
DLG4	BEGAIN
DLG4	CNKSR2
DLG4	NLGN1
DLG4	SEMA4C
DLG4	NLGN2
DLG4	GDA
DLG4	KCNA5
DLG4	KCNJ12
DLG4	KCND2
DLG4	DLGAP2
DLG4	DLGAP1
DLG4	CIT
DLG4	GRIN3A
DLG4	GRIN3B
DLG4	KIF13B
DLG4	ZDHHC17
DLG4	LIN7B
DLG4	NDOR1
DLG4	ACCN3
DLG4	SIPA1L1
DLG4	-
DLG4	GRIN1
DLG4	SYNGAP1
DLG4	DLGAP4
DLG4	GRASP
DLG4	TANC1
DLG4	HTT
DLG4	EFNB2
DLG4	CD46
DLG4	FZD2
DLG4	FZD7
DLG4	WNT3A
DLG4	GNG13
DLG4	SCN5A
DLG4	MAPK12
DLG4	GLS2
DLG4	KCNA1
DLG4	KCNA2
DLG4	KCNA3
DLG4	GRIN2B
DLG4	GRIK2
DLG4	CRIPT
DLG4	CACNG2
DLG4	KCNA4
DLG4	GRIN2A
DLG4	LRP8
DLG4	LRFN1
DLG4	SEMA4B
DLG4	SEMA4G
DLG4	SRC
DLG4	NCKIPSD
DLG4	FYN
DLG4	GRIK1
DLG4	GRIN2C
DLG4	NOS1
DLG4	EXOC4
DLG4	DYNLL2
DLG4	DLGAP3
DLG4	KHDRBS1
DLG4	PCDH10
DLG4	MDM2
DLG4	SPRR2A
DLG4	TRAF6
PIK3R2	TGFBR1
PIK3R2	SHC1
PIK3R2	SOS1
PIK3R2	YWHAB
PIK3R2	SOCS1
PIK3R2	SYK
PIK3R2	YWHAQ
PIK3R2	KRT20
PIK3R2	MRFAP1L1
PIK3R2	STAT3
PIK3R2	PTEN
PICK1	GRIP1
PICK1	F11R
PICK1	SACS
PICK1	APTX
PICK1	UBQLN4
PICK1	ERBB2IP
PICK1	ATXN1L
HDAC1	PHB
HDAC1	PCNA
HDAC1	TAL1
HDAC1	PTMA
HDAC1	SP1
HDAC1	SUV39H1
HDAC1	SMAD2
HDAC1	ING1
HDAC1	SP3
HDAC1	NRIP1
HDAC1	RBBP7
HDAC1	RBBP4
HDAC1	IKZF1
HDAC1	SAP30
HDAC1	MTA1
HDAC1	HEY2
HDAC1	HDAC9
HDAC1	SETDB1
HDAC1	HDAC3
HDAC1	UBE2I
HDAC1	PIAS3
HDAC1	EED
HDAC1	DNMT3L
HDAC1	SIN3A
HDAC1	KDM1A
HDAC1	DDX17
HDAC1	ZBTB16
HDAC1	HBP1
HDAC1	-
HDAC1	RFC4
HDAC1	PML
HDAC1	RFC1
HDAC1	STAT3
HDAC1	NFKBIA
HDAC1	KAT5
HDAC1	NCOR2
HDAC1	PIAS4
HDAC1	PHB2
HDAC1	TP53
HDAC1	NFKB1
HDAC1	RELA
HDAC1	MDM2
HDAC1	KMT2A
HDAC1	YY1
HDAC1	TAB2
HDAC1	MXD1
HDAC1	MBD4
HDAC1	SPI1
HDAC1	MECP2
HDAC1	WHSC1
HDAC1	REST
HDAC1	CHFR
HDAC1	MBTPS1
HDAC1	SERPINB5
HDAC1	MEN1
HDAC1	SYK
HDAC1	LCOR
HDAC1	TFCP2
HDAC1	NR0B2
HDAC1	HNRNPD
HDAC1	PRKACA
HDAC1	SMAD3
HDAC1	MYC
HDAC1	PPARG
HDAC1	HIST1H4A
HDAC1	HIST3H3
HDAC1	PRKG1
HDAC1	BHLHE40
HDAC1	RARA
HDAC1	SUMO2
HDAC1	HIST1H3A
CBL	LYN
CBL	PLCG1
CBL	PTPN6
CBL	ITK
CBL	SRC
CBL	SYK
CBL	SCN5A
CBL	NCK1
CBL	SHC1
CBL	PTK2B
CBL	UBE2G1
CBL	LCP2
CBL	CRKL
CBL	SPRY2
CBL	KHDRBS1
CBL	UBE2D2
CBL	UBE2G2
CBL	PIK3R2
CBL	UBE2L3
CBL	SLA2
CBL	FRS2
CBL	UBASH3B
CBL	GRB2
CBL	YWHAB
CBL	YWHAZ
CBL	PRKCA
CBL	PTPN11
CBL	STAT5A
CBL	TRAF6
CBL	SH2B2
CBL	OSTF1
CBL	YWHAG
CBL	PIK3R1
CBL	LAT
CBL	IGF1R
CBL	EGFR
CBL	FYN
CBL	HCK
CBL	YWHAQ
CBL	KRT18
CBL	LCK
CBL	CRK
CBL	CSF1R
CBL	MET
CBL	MYO1C
CBL	ARHGEF7
CBL	UBE2D1
CBL	UBC
CBL	ITSN1
CBL	CDC42
CBL	ITSN2
CBL	MAPK8
CBL	BLNK
CBL	YES1
CBL	PRKCQ
CBL	UBE2D3
CBL	CTNNB1
CBL	ERBB2
CBL	PIK3R3
CBL	STAT3
CBL	TGM2
CBL	JAK2
PLCG1	GNB2L1
PLCG1	SOS1
PLCG1	SRC
PLCG1	WAS
PLCG1	SYK
PLCG1	PTK2
PLCG1	LAT
PLCG1	PLD2
PLCG1	KHDRBS1
PLCG1	VAV3
PLCG1	GIT1
PLCG1	-
PLCG1	PTPN11
PLCG1	SHC1
PLCG1	SH2D2A
PLCG1	BLNK
PLCG1	RHOU
PLCG1	SYNCRIP
MAPK1	PTPN1
MAPK1	RXRA
MAPK1	SREBF1
MAPK1	SP1
MAPK1	ZFP36
MAPK1	TP53
MAPK1	RPS6KA3
MAPK1	SREBF2
MAPK1	SHC1
MAPK1	STAT5A
MAPK1	RPS6KA1
MAPK1	NCOA3
MAPK1	KHDRBS1
MAPK1	PXN
MAPK1	NCOA1
MAPK1	PPP1R9B
MAPK1	HDAC4
MAPK1	FRS3
MAPK1	TPR
MAPK1	CALCOCO1
MAPK1	TSC2
MAPK1	TNFRSF1A
MAPK1	STAT3
MAPK1	SOS1
MAPK1	MAPK8
MAPK1	RPS6KB1
MAPK1	FRS2
MAPK1	TCF3
MAPK1	SNCA
MAPK1	RAF1
MAPK1	ADAM17
MAPK1	TFCP2
MAPK1	VDR
MAPK1	RARA
MAPK1	MAPKAPK2
MAPK1	CUEDC2
MAPK1	SHANK3
MAPK1	HDAC6
MAPK1	REST
MAPK1	UBE3A
BTK	LYN
BTK	CBL
BTK	PRKCB
BTK	ITK
BTK	PRKCQ
BTK	PRKCE
BTK	PRKCA
BTK	WAS
BTK	SYK
BTK	PLCG2
BTK	GNAQ
BTK	CAV1
BTK	STAT5A
BTK	GTF2I
BTK	KHDRBS1
BTK	GNA12
BTK	BLNK
BTK	SH2B2
BTK	RELA
BTK	PLCG1
BTK	IRAK1
BTK	TP53
BTK	EWSR1
BTK	HCK
BTK	RPS6KB1
BTK	RPS6KB2
BTK	FYN
BTK	GRB2
BTK	BCL2L11
BTK	PIK3R3
BTK	SMURF1
BTK	AURKA
BTK	MEOX2
BTK	MDM2
TGFBR1	-
TGFBR1	SNX6
TGFBR1	ASH2L
TGFBR1	FANCL
TGFBR1	GNA13
TGFBR1	DCAF6
TGFBR1	STUB1
TGFBR1	UBB
TGFBR1	UBE2E3
TGFBR1	SQSTM1
TGFBR1	TRAF6
TGFBR1	RANBP9
TGFBR1	OTUB1
SYK	TUBA4A
SYK	LAT
SYK	TRAF6
SYK	BLNK
SYK	SH2B2
SYK	UBB
SYK	TNFRSF1A
SYK	HDAC3
SYK	HDAC4
SYK	HDAC6
SYK	HDAC9
SYK	UBASH3B
SYK	SH2D2A
SYK	TRIM15
SYK	RHOU
SYK	HGS
PRKCQ	YWHAG
PRKCQ	GLRX3
PRKCQ	IKBKG
PRKCQ	TAL1
PRKCQ	YWHAQ
HNRNPK	LYN
HNRNPK	PRKCD
HNRNPK	ITK
HNRNPK	SRC
HNRNPK	PCBP1
HNRNPK	GFI1B
HNRNPK	KHDRBS1
HNRNPK	PRMT1
HNRNPK	NCK2
HNRNPK	SAFB
HNRNPK	YBX1
HNRNPK	TBP
HNRNPK	QKI
HNRNPK	UBE2I
HNRNPK	ITSN2
HNRNPK	TERF2IP
HNRNPK	EIF3F
HNRNPK	MDM2
HNRNPK	TP53
HNRNPK	SUMO1
HNRNPK	RBM10
HNRNPK	SF1
HNRNPK	HNRNPA0
HNRNPK	DDX17
HNRNPK	SYNCRIP
HNRNPK	RBM4
HNRNPK	RBFOX2
HNRNPK	SMAD3
HNRNPK	YWHAQ
HNRNPK	TCERG1
HNRNPK	PRPF40A
HNRNPK	NEDD4
HNRNPK	PIN1
HNRNPK	PRPF31
HNRNPK	MARK4
HNRNPK	CCDC33
HNRNPK	HIST3H3
HNRNPK	SUMO2
HNRNPK	SRPK2
HNRNPK	CMTM5
HNRNPK	AURKA
HNRNPK	FBXO7
HNRNPK	RBM14
PTK2B	LYN
PTK2B	PIK3R1
PTK2B	KCNA2
PTK2B	PTPN11
PTK2B	PTPN6
PTK2B	PRKCD
PTK2B	SRC
PTK2B	GRB2
PTK2B	SYK
PTK2B	SHC1
PTK2B	PXN
PTK2B	BCAR1
PTK2B	GNA13
PTK2B	RASA1
PTK2B	IL7R
PTK2B	STAT3
PTK2B	TGFB1I1
PTK2B	PTK2
PTK2B	DLGAP3
PTK2B	FYN
PTK2B	GRIN2A
PTK2B	JAK2
PTK2B	LCK
PTK2B	MCAM
PTK2B	SNCA
PTK2B	SOCS3
PTK2B	MAPT
EZH2	HDAC1
EZH2	EED
EZH2	CCDC85B
EZH2	GTF3C1
EZH2	HIST1H3A
EZH2	HIST1H1A
EZH2	PHB2
EZH2	RBBP4
EZH2	HIST3H3
EZH2	GADD45G
EZH2	RASA1
EZH2	RPS6KA5
EZH2	TK1
EZH2	SMN1
EZH2	PJA1
EZH2	RELA
EZH2	EHMT1
EZH2	SMYD3
EZH2	MED1
EZH2	KDM1A
EZH2	PRMT5
EZH2	SUV39H1
EZH2	JAK2
EZH2	CEP63
EZH2	RIN3
EZH2	KAT2B
EZH2	SIRT1
EZH2	TRIM28
LCP2	LYN
LCP2	PLCG1
LCP2	PTPN6
LCP2	WAS
LCP2	SYK
LCP2	PLCG2
LCP2	NCK1
LCP2	SHC1
LCP2	LAT
LCP2	BLNK
LCP2	VAV3
LCP2	PIK3R1
LCP2	YWHAZ
LCP2	YBX1
LCP2	NCK2
LCP2	FXR2
LCP2	YWHAE
LCP2	LMNA
LCP2	PJA1
ZYX	VAV3
ZYX	LATS1
ZYX	ZHX1
ZYX	LIN7A
ZYX	SIRT1
SIAH2	TRAF2
SIAH2	UBE2L6
SIAH2	PEG10
SIAH2	PIAS1
SIAH2	PIAS2
SIAH2	UBE2I
SIAH2	PIAS3
SIAH2	SNCA
SIAH2	SPRY2
SIAH2	HIPK2
SIAH2	TINF2
SIAH2	UBE2D2
SIAH2	UBE2D1
SIAH2	TP53BP2
SIAH2	UBE2D3
SIAH2	SETD2
SIAH2	STAT3
SIAH2	CHEK2
SIAH2	ZYX
SIAH2	UBE2N
ARHGDIB	CASP3
ARHGDIB	RAC1
ARHGDIB	CDC42
ARHGDIB	RAC3
ARHGDIB	UBE3A
SOCS1	CUEDC2
YES1	OGT
YES1	KHDRBS1
YES1	SOCS3
YES1	FXR2
YES1	THAP1
YES1	NIF3L1
YES1	C1orf94
YES1	OLIG1
RPL10	YES1
RPL10	SRC
ERBB4	ADAM17
ERBB4	STAT5A
ERBB4	SHC1
ERBB4	PIK3R2
ERBB4	GRB2
ERBB4	NRG1
ERBB4	MUC1
ERBB4	HDAC6
ERBB4	NEDD4
ERBB4	TAB2
ERBB4	RASA1
ERBB4	SYK
ERBB4	ANKS1B
ERBB4	PTPN6
ERBB4	PTPN11
ERBB4	PPM1A
ERBB4	DUSP10
ERBB4	FYN
ERBB4	NTRK2
TP53BP2	YES1
TP53BP2	UTP14A
TP53BP2	YWHAG
TP53BP2	YWHAQ
TP53BP2	HIST1H2BC
TP53BP2	LMO4
TP53BP2	NDC80
TP53BP2	HNRNPUL1
TP53BP2	PRPF31
TP53BP2	UBE3A
REL	SP1
REL	TBP
REL	RELA
REL	SIN3A
REL	SRF
REL	ARNT2
REL	BZRAP1
REL	DGCR6
REL	MVP
REL	TDO2
REL	ATXN1
REL	SDCBP
REL	NCK2
REL	CGGBP1
REL	STK16
REL	RBM39
REL	ARIH2
REL	GADD45G
REL	OSTF1
REL	OSGIN1
REL	TTC19
REL	ASAP3
REL	NGB
REL	ATG9A
REL	C9orf72
REL	YARS
SP1	SREBF1
SP1	TAL1
SP1	OGT
SP1	YY1
SP1	SREBF2
SP1	SP3
SP1	ZBTB16
SP1	TAF4
SP1	AATF
SP1	ATF7IP
SP1	SOX8
SP1	NCOR1
SP1	NCOR2
SP1	TP53
SP1	TBP
SP1	NR2F1
SP1	LDB1
SP1	SRF
SP1	CBX5
SP1	PPIG
TBP	TP53
TBP	NCOA3
TBP	NCOA1
TBP	IKZF1
TBP	TRIP4
TBP	TAF1A
TBP	TAF1B
TBP	HAP1
TBP	PIAS1
TBP	PIAS3
TBP	YWHAE
TBP	NCOA6
TBP	UBE2I
TBP	HIST3H3
LAPTM5	UBAC1
LAPTM5	NEDD4L
LAPTM5	HEYL
LAPTM5	LDLRAD1
MAPK8	REL
MAPK8	TP53
MAPK8	PXN
MAPK8	IKBKAP
MAPK8	BCL2L11
MAPK8	DUSP10
MAPK8	STAT3
MAPK8	YWHAZ
MAPK8	SHC1
MAPK8	TRAF6
MAPK8	RPS6KB1
MAPK8	SPI1
MAPK8	SIRT1
MAPK8	HDAC9
MAPK8	TFCP2
MAPK8	PIAS2
MAPK8	PNRC1
MAPK8	NCOA3
MAPK8	RAD18
MAPK8	SSU72
MAPK8	RAF1
MAPK8	SP1
HSPA8	REL
HSPA8	RAF1
HSPA8	SP1
HSPA8	CITED1
HSPA8	DYNLL1
HSPA8	STUB1
HSPA8	TCERG1
HSPA8	PPID
HSPA8	RGS2
HSPA8	UBC
HSPA8	HDAC3
HSPA8	YWHAG
HSPA8	MAPT
HSPA8	TADA3
HSPA8	HSP90AA1
HSPA8	YWHAQ
HSPA8	JAK2
HSPA8	TP53
HSPA8	TNFRSF1A
HSPA8	PARK2
HSPA8	HGS
HSPA8	IL16
HSPA8	MAPK8
HSPA8	SNCA
HSPA8	ATP13A2
HSPA8	SGTA
HSPA8	TGM2
HSPA8	JUN
HSPA8	NMI
HSPA8	SUMO2
HSPA8	PTEN
HSPA8	HIST1H3A
GTF2B	REL
GTF2B	JUN
GTF2B	GTF2E2
GTF2B	GTF2F1
GTF2B	TBP
GTF2B	NCOA3
GTF2B	NCOA4
GTF2B	NCOA1
GTF2B	IKZF1
GTF2B	POLR2A
GTF2B	TAF9
GTF2B	THRA
GTF2B	PSMC5
GTF2B	YWHAE
GTF2B	NR2F1
GTF2B	VDR
GTF2B	RELA
GTF2B	MECP2
GTF2B	REST
GTF2B	NCOR1
GTF2B	SRA1
GTF2B	HNF4A
CALM1	REL
CALM1	DDX5
CALM1	DLG3
CALM1	GJB1
CALM1	RGS2
CALM1	EGFR
CALM1	ESR1
CALM1	EWSR1
CALM1	HSP90AA1
CALM1	TCF3
CALM1	MAPT
CALM1	SNCA
CALM1	PHKG1
CALM1	OPRM1
CALM1	SNTA1
CALM1	ESR2
CALM1	CAMK2G
CALM1	TCF4
CALM1	AKAP5
CALM1	YWHAE
CALM1	LYST
CALM1	CSNK2A1
CALM1	GRIN1
CALM1	STRN
CALM1	CRHR1
CALM1	GLP1R
CALM1	GRB7
CALM1	SCTR
CALM1	RGS4
CALM1	HTR2C
CALM1	NR3C1
CALM1	RELA
CALM1	AKAP9
CALM1	H2AFX
CALM1	SYK
CALM1	OPTN
CALM1	RDX
CALM1	GTF2I
CALM1	UCHL5
CALM1	RAD23B
CALM1	CDC5L
CALM1	KIF1B
CALM1	PAM
CALM1	STAG1
CALM1	SNX6
CALM1	YBX1
CALM1	S100B
CALM1	RPS15A
CALM1	PSMD2
CALM1	SET
CALM1	PRDX1
CALM1	IMMT
CALM1	RPL13A
CALM1	SQSTM1
CALM1	HSPA4
CALM1	FKBP4
CALM1	SCN5A
CALM1	CSNK2B
CALM1	ARHGEF7
CALM1	SPP1
CALM1	SEC61A1
CALM1	TSC2
CALM1	DRD2
CALM1	NOS3
CALM1	RYR2
CALM1	YWHAQ
CALM1	PTEN
CALM1	UBE3A
CALM1	MYC
CALM1	MFHAS1
CALM1	ERBB2
LYN	PLCG1
LYN	PTPN6
LYN	PRKCD
LYN	SYK
LYN	PLCG2
LYN	PRKCQ
LYN	SHC1
LYN	PTK2
LYN	MAPK3
LYN	KHDRBS1
LYN	BCAR1
LYN	PPP1R15A
LYN	EVL
LYN	SH2B2
LYN	RASA1
LYN	UBB
LYN	PAK2
LYN	TRIP10
LYN	MUC1
LYN	SNCA
LYN	SRC
LYN	RPS6KB1
LYN	RPS6KB2
LYN	RPL10
LYN	STAT3
LYN	TNF
LYN	TRIM28
PIK3R1	PTPN11
PIK3R1	SRC
PIK3R1	TGFBR1
PIK3R1	WAS
PIK3R1	SHC1
PIK3R1	PTK2
PIK3R1	MAPK8
PIK3R1	RAC1
PIK3R1	TUBA1B
PIK3R1	BCAR1
PIK3R1	SOCS1
PIK3R1	HGS
PIK3R1	YWHAG
PIK3R1	VAV3
PIK3R1	-
PIK3R1	PPM1A
PIK3R1	PTPN6
PIK3R1	KHDRBS1
PIK3R1	SYK
PIK3R1	RASA1
PIK3R1	PSEN1
PIK3R1	LAT
PIK3R1	ITSN1
PIK3R1	ZDHHC17
PIK3R1	SQSTM1
PIK3R1	SH2D2A
PIK3R1	STAT3
PIK3R1	NYAP1
PIK3R1	NYAP2
PIK3R1	MYO16
PIK3R1	LNX2
PIK3R1	LRRK2
PIK3R1	YWHAZ
PTPN11	TNFRSF1A
PTPN11	STAT1
PTPN11	SHC1
PTPN11	STAT5A
PTPN11	SPRY2
PTPN11	PXN
PTPN11	MVP
PTPN11	FRS2
PTPN11	FRS3
PTPN11	STAT3
PTPN11	SOCS3
PTPN11	SRC
PTPN11	SOS1
PTPN11	SYNCRIP
PTPN11	LNX1
PTPN11	BEX2
PTPN6	SRC
PTPN6	TNFRSF1A
PTPN6	SYK
PTPN6	KHDRBS1
PTPN6	BLNK
PTPN6	PTPN11
PTPN6	SHC1
PTPN6	TRAF6
PTPN6	SOS1
PTPN6	OLIG1
PTPN6	LAT
PRKCA	SPP1
PRKCA	PTPN11
PRKCA	GNB2L1
PRKCA	SCTR
PRKCA	SRC
PRKCA	TP53
PRKCA	VTN
PRKCA	RPL10
PRKCA	XK
PRKCA	SYK
PRKCA	RGS2
PRKCA	YWHAZ
PRKCA	RAC1
PRKCA	STXBP1
PRKCA	AKAP5
PRKCA	YWHAG
PRKCA	PRKG1
PRKCA	RARA
PRKCA	PTPN6
PRKCA	F11R
PRKCA	SHC1
PRKCA	PICK1
PRKCA	NUMB
PRKCA	SLC1A1
PRKCA	SDC2
PRKCA	RAF1
PRKCA	HIST1H3A
PRKCA	HDAC6
PRKCA	HIST3H3
PRKCA	SCRIB
PRKCA	RBCK1
PRKCA	SMURF1
PRKCA	FBXO7
SRC	GNB2L1
SRC	IKBKG
SRC	WAS
SRC	SYK
SRC	STAT1
SRC	SRF
SRC	YWHAB
SRC	STAT5A
SRC	KIFAP3
SRC	TRAF6
SRC	KHDRBS1
SRC	BCAR1
SRC	YWHAE
SRC	YWHAG
SRC	GIT1
SRC	EVL
SRC	-
SRC	DOK4
SRC	YWHAH
SRC	STAT3
SRC	FRS2
SRC	PELP1
SRC	TRIP10
SRC	NR1I2
SRC	THRA
SRC	MED28
SRC	HNF1A
SRC	NCOA6
SRC	ARHGAP32
SRC	HDAC3
SRC	VDR
SRC	THRB
SRC	PPARGC1B
SRC	STUB1
SRC	USP8
SRC	TNFRSF1A
SRC	TP53
SRC	PIK3R3
SRC	SRPK2
SRC	TRIM15
SRC	SH2D2A
SRC	NR1I3
SRC	ERRFI1
SRC	GRASP
SRC	LATS1
STAT1	GNB2L1
STAT1	TNFRSF1A
STAT1	TNFRSF1B
STAT1	VDR
STAT1	TRADD
STAT1	NMI
STAT1	RPS6KA5
STAT1	UBE2I
STAT1	PIAS1
STAT1	STAT3
STAT1	STAT5A
STAT1	SYK
STAT1	SHANK1
STAT1	LZTR1
STAT1	NOMO1
STAT1	NOMO2
CRKL	PIK3R1
CRKL	PTPN11
CRKL	SOS1
CRKL	GRB2
CRKL	WAS
CRKL	SYK
CRKL	SHC1
CRKL	STAT5A
CRKL	TGFB1I1
CRKL	PXN
CRKL	DOK1
CRKL	BCAR1
CRKL	PIK3R2
CRKL	DAB1
CRKL	BLNK
CRKL	EVL
CRKL	-
CRKL	KIDINS220
CRKL	LYN
CRKL	IGF1R
CRKL	ARHGAP32
CRKL	GRN
CRKL	PLSCR1
CRKL	LAMA5
CRKL	ERBB2
CRKL	ERBB3
CRKL	YY1
CRKL	KHDRBS1
CRKL	SHANK3
CRKL	EGFR
CRKL	SOCS1
CRKL	RIN3
DOK1	PTPN6
DOK1	SH2D1A
DOK1	NCK1
DOK1	NCK2
DOK1	FYN
DOK1	HCK
DOK1	YES1
DOK1	LYN
DOK1	PLCG1
DOK1	SRC
DOK1	SHC1
DOK1	RASA1
DOK1	LCK
DOK1	PIK3R1
DOK1	ITK
DOK1	ERBB2
DOK1	EGFR
MPDZ	SYNGAP1
MPDZ	F11R
LCK	STAT3
LCK	MUC1
LCK	PTK2
LCK	STAT5A
LCK	LAT
LCK	SH2D1A
LCK	PAK2
LCK	MED28
LCK	-
LCK	RASA1
LCK	NFKBIA
LCK	RAF1
LCK	PIK3R1
LCK	PIK3CA
LCK	PLCG1
LCK	PTPN11
LCK	PTPN6
LCK	MAPK1
LCK	PRKCA
LCK	PRKCD
LCK	PTPRF
LCK	SYK
LCK	PLCG2
LCK	PRKCQ
LCK	STAT1
LCK	SHC1
LCK	SQSTM1
LCK	LCP2
LCK	PRKACA
LCK	MAPK3
LCK	PLD2
LCK	KHDRBS1
LCK	PXN
LCK	BCAR1
LCK	SH2D2A
LCK	UBE3A
LCK	IKBKG
LCK	SOS1
LCK	SMAD2
LCK	SMAD3
LCK	WAS
LCK	UBC
LCK	RIN3
LCK	SMURF1
SH2B2	SH2B1
WAS	TRIP10
WAS	ITSN2
WAS	NCKIPSD
WAS	ARHGEF7
WAS	EVL
WAS	TCERG1
WAS	PRPF40A
WAS	GAS7
WAS	NCK2
PTK2	PTPN11
PTK2	SRC
PTK2	SYK
PTK2	STAT1
PTK2	SHC1
PTK2	TRIO
PTK2	TGFB1I1
PTK2	PXN
PTK2	BCAR1
PTK2	NCK2
PTK2	GIT1
PTK2	PIAS1
PTK2	RIPK1
PTK2	TNFRSF1A
PTK2	ROCK1
PTK2	TP53
PTK2	DLGAP3
PTK2	TSC2
PTK2	RAC1
PTK2	SRPK1
PTK2	YES1
PTK2	SOCS3
PTK2	DOK4
PTK2	PTPN6
PTK2	SH2D2A
PTK2	PIK3R3
PTK2	SH2D1B
PTK2	TRIM15
PTK2	SOCS1
INS	LRP2
INS	KMT2A
INS	TCF4
INS	PTEN
CBX3	CBX5
CBX3	WHSC1L1
CBX3	NIPBL
CBX3	HIPK2
FZD1	WNT3A
ABL1	JUN
ABL1	CBL
ABL1	PTPN6
ABL1	GRB2
ABL1	SRC
ABL1	TP53
ABL1	NTRK1
ABL1	BTK
ABL1	NCK1
ABL1	EPHB2
ABL1	BIN1
ABL1	CRKL
ABL1	PXN
ABL1	APBB1
ABL1	GRIN2D
ABL1	DOK1
ABL1	BCAR1
ABL1	PAK2
ABL1	NCSTN
ABL1	ATM
ABL1	PLSCR1
ABL1	POLR2A
ABL1	CTNND2
ABL1	EVL
ABL1	SHD
ABL1	CDK1
ABL1	BRCA1
ABL1	PIK3R1
ABL1	PLCG1
ABL1	RASA1
ABL1	ACTA1
ABL1	CAV1
ABL1	TRAF6
ABL1	CDK5
ABL1	MAPT
ABL1	CDKN1B
ABL1	MUC1
ABL1	YWHAZ
ABL1	YWHAE
ABL1	YWHAH
ABL1	YWHAB
ABL1	YWHAG
ABL1	YWHAQ
ABL1	EP300
ABL1	CREB1
ABL1	HCK
ABL1	JAK2
ABL1	XRCC6
ABL1	APP
ABL1	CRK
ABL1	MDM2
ABL1	SPTAN1
ABL1	RYBP
ABL1	NCOA3
ABL1	TOPBP1
ABL1	NFKBIA
ABL1	PARK2
ABL1	NEDD4
ABL1	BAG1
ABL1	HSPA8
ABL1	NEDD4L
ABL1	PRDX1
ABL1	EGFR
ABL1	ERBB2
ABL1	ERBB3
ABL1	ERBB4
ABL1	UBC
ABL1	SRPK2
ABL1	SPRR2A
ABL1	GTF2F1
ABL1	STUB1
ABL1	CDON
ABL1	MBP
ABL1	HIPK2
ABL1	CDKN1A
ABL1	FBXO7
ABL1	LRRK1
RAB8A	OPTN
RAB8A	PQBP1
RAB8A	OCRL
RAB8A	IKBKG
OPTN	MAP1LC3B
OPTN	RAB14
OPTN	PIAS4
OPTN	ZNF398
OPTN	ZDHHC17
OPTN	GABARAP
OPTN	LNX2
PLCG2	SHC1
PLCG2	LAT
PLCG2	KHDRBS1
PLCG2	BLNK
PLCG2	SYK
PLCG2	TP53
PLCG2	KCTD17
PLCG2	PTPN6
SHC1	SP1
SHC1	SRC
SHC1	SYK
SHC1	VAV3
SHC1	TPR
SHC1	MAPKAPK2
SHC1	SOS1
SHC1	STAT5A
SHC1	SH2B2
SHC1	NUDT21
SHC1	SUV39H2
SHC1	TRIM15
SHC1	UBASH3B
GNAI3	MTNR1B
GNAI3	MTNR1A
GNAI3	NUCB1
GNAI3	RGS3
GNAI3	NGB
GNAI3	HTR1A
GNAI3	RGS2
GNAI3	GNB1
SPI1	TBP
SPI1	SIN3A
SETDB1	TRIM28
SETDB1	PIAS4
SETDB1	SIN3A
SETDB1	ATF7IP
SETDB1	TCERG1
SETDB1	TRIB3
SETDB1	-
SETDB1	KDM1A
SETDB1	HIST2H3A
SETDB1	HIST4H4
SETDB1	LUC7L2
SETDB1	LRIF1
SETDB1	ZDHHC17
SOS1	NCK2
SOS1	PACSIN1
SOS1	FRS2
SOS1	RANBP9
SOS1	SPTAN1
SOS1	ITSN2
NCK1	SOS1
NCK1	WAS
NCK1	NTRK2
NCK1	RAC1
NCK1	KHDRBS1
NCK1	PXN
NCK1	PAK1
NCK1	BCAR1
NCK1	SOCS1
NCK1	EIF2S2
NCK1	BLNK
NCK1	PAK2
NCK1	ARHGEF7
NCK1	EIF2B2
NCK1	CYFIP2
NCK1	NCKIPSD
NCK1	-
NCK1	RHOU
NCK1	PLCG1
NCK1	FRS2
NCK1	RASA1
NCK1	ARHGAP32
NCK1	PTK2
NCK1	PFN1
NCK1	SHANK3
NCK1	OLIG1
NCK1	PIK3R3
EPHB2	SRC
EPHB2	NCK1
EPHB2	ITSN1
EPHB2	GRIN1
EPHB2	GRIN2B
EPHB2	SDC2
EPHB2	GRB2
EPHB2	PTK2
EPHB2	SDCBP
EPHB2	PICK1
EPHB2	RASA1
EPHB2	YES1
EPHB2	PLCG1
EPHB2	FBXO7
PRKCD	PTPN6
PRKCD	STAT1
PRKCD	SHC1
PRKCD	ADAM9
PRKCD	GNA13
PRKCD	YWHAG
PRKCD	YWHAB
PRKCD	STAT3
PRKCD	GNB2L1
PRKCD	MAPK3
PRKCD	MAPK1
PRKCD	RAF1
PRKCD	SRC
PRKCD	YWHAZ
PRKCD	NUMB
PRKCD	RAC1
PRKCD	SP1
PRKCD	HDAC5
PRKCD	TNFRSF1A
PRKCD	MACF1
PRKCD	VCP
PRKCD	SPRY2
PRKCD	SQSTM1
GRIA3	LYN
GRIA3	NSF
GRIA3	SDCBP
GRIA3	PPM1G
GRIA3	GZMB
GRIA3	GRIP2
GRIA3	PICK1
GRIA3	SQSTM1
GRIA3	GRIP1
CASP3	LYN
CASP3	PTMA
CASP3	SP1
CASP3	TGM2
CASP3	PRKCQ
CASP3	SREBF2
CASP3	SRF
CASP3	PSEN2
CASP3	PKN1
CASP3	CASP8
CASP3	NEDD4
CASP3	PXN
CASP3	BCAR1
CASP3	IL16
CASP3	PAK2
CASP3	ATN1
CASP3	DCTN1
CASP3	UBE4B
CASP3	SARS2
CASP3	ROCK1
CASP3	RFC1
CASP3	CTNNB1
CASP3	CDKN1A
CASP3	CDC42
CASP3	CDC27
CASP3	MET
CASP3	SPTAN1
CASP3	RAC1
CASP3	CDK11B
CASP3	YWHAE
CASP3	GZMB
CASP3	KRT18
CASP3	CASP6
CASP3	TOP1
CASP3	MDM2
CASP3	HIP1
CASP3	GATA1
CASP3	FYN
CASP3	RASA1
CASP3	HTT
CASP3	PSEN1
CASP3	MAPT
CASP3	HMGB1
CASP3	RNF2
CASP3	MDC1
CASP3	ZBTB16
CASP3	MAPK8
CASP3	MAPK9
CASP3	YWHAG
CASP3	STAT1
CASP3	CASP7
CASP3	PTGES3
MAPK3	SREBF1
MAPK3	TAL1
MAPK3	SP1
MAPK3	TP53
MAPK3	RPS6KA3
MAPK3	SREBF2
MAPK3	RPS6KA1
MAPK3	HDAC4
MAPK3	DUSP10
MAPK3	STAT3
MAPK3	STAT5A
MAPK3	RAF1
MAPK3	MAPK8
MAPK3	PTPN11
MAPK3	SYK
MAPK3	PXN
MAPK3	NCKIPSD
MAPK3	RPS6KB1
MAPK3	TSC2
MAPK3	TCF3
MAPK3	VDR
MAPK3	RXRA
MAPK3	NUPL1
MAPK3	MAPKAPK2
MAPK3	SCRIB
MAPK3	CUEDC2
MAPK3	HDAC6
MAPK3	FOXP2
MAPK3	L3MBTL3
MAPK3	MAGED1
MAPK3	FRS2
MAPK3	SOS1
KHDRBS1	ITSN2
KHDRBS1	OSTF1
KHDRBS1	PACSIN1
KHDRBS1	NCKIPSD
KHDRBS1	UBASH3B
KHDRBS1	RBFOX2
KHDRBS1	POT1
BCAR1	-
BCAR1	PPP1R15A
BCAR1	ARHGAP32
PPP1R15A	CUEDC2
EVL	PRPF40A
GRB2	RASA1
GRB2	HTT
GRB2	JAK2
GRB2	MUC1
GRB2	NGFR
GRB2	HNRNPC
GRB2	MET
GRB2	PIK3R1
GRB2	PLCG1
GRB2	PRNP
GRB2	PTPN11
GRB2	PTPN6
GRB2	PTPN1
GRB2	MAPK1
GRB2	SOS1
GRB2	ITK
GRB2	PRKAR1A
GRB2	SRC
GRB2	TNFRSF1A
GRB2	NTRK1
GRB2	WAS
GRB2	SH2D1A
GRB2	OCRL
GRB2	SYK
GRB2	SHC1
GRB2	PTK2
GRB2	SNTA1
GRB2	GRB7
GRB2	LCP2
GRB2	LAT
GRB2	MAPK12
GRB2	SPRY2
GRB2	KHDRBS1
GRB2	BCAR1
GRB2	PIK3R2
GRB2	USP8
GRB2	MTA1
GRB2	SOCS1
GRB2	BLNK
GRB2	VAV3
GRB2	FRS2
GRB2	FRS3
GRB2	NCKIPSD
GRB2	SH2B1
GRB2	MED28
GRB2	RHOU
GRB2	PAK1
GRB2	NPM1
GRB2	SHC3
GRB2	RPS6KA1
GRB2	PAK4
GRB2	SH2B2
GRB2	SHC2
GRB2	PNRC1
GRB2	PAK2
GRB2	PXN
GRB2	SYNCRIP
GRB2	MAPK9
GRB2	HNRNPK
GRB2	HSPA5
GRB2	KRT8
GRB2	MAP1A
GRB2	NCL
GRB2	SLC1A2
GRB2	SPTBN1
GRB2	UBC
GRB2	DLGAP1
GRB2	ARHGAP32
GRB2	TCERG1
GRB2	ERRFI1
GRB2	SH2D4A
GRB2	MSI2
GRB2	POLR2A
GRB2	TSC2
GRB2	AP4S1
GRB2	SHBG
GRB2	GIT1
GRB2	UBA1
GRB2	KPNA2
GRB2	PON2
GRB2	CASC3
GRB2	MLXIPL
GRB2	SHANK3
GRB2	LMO2
GRB2	REL
GRB2	TP53BP2
GRB2	DDX17
GRB2	DPPA4
GRB2	NIF3L1
GRB2	LNX1
GRB2	C1orf94
GRB2	INCA1
GRB2	CRBN
GRB2	PPARA
GRB2	VCP
GRB2	OLIG1
GRB2	LNX2
JUN	SPI1
JUN	POU1F1
JUN	SP1
JUN	TBP
JUN	STAT1
JUN	SMAD4
JUN	PIN1
JUN	MAPK8
JUN	SMAD2
JUN	TDG
JUN	SMARCD1
JUN	VDR
JUN	MAPK3
JUN	SUMO1
JUN	NCOA3
JUN	NRIP1
JUN	NCOA1
JUN	MAPK9
JUN	TCF20
JUN	SMAD3
JUN	TRIP4
JUN	MYBBP1A
JUN	COPS5
JUN	HDAC3
JUN	UBE2I
JUN	RBM39
JUN	COBRA1
JUN	PIAS1
JUN	SUMO2
JUN	SUMO3
JUN	STAT3
JUN	TOP1
JUN	MAPK11
JUN	NCOA2
JUN	SOX8
JUN	SOX10
JUN	SMARCD3
JUN	NTRK3
JUN	TCF4
JUN	UBB
JUN	RELA
JUN	SKI
JUN	NELFB
JUN	NCOA6
JUN	PML
JUN	NCOR2
JUN	UBC
JUN	MACF1
JUN	HDAC9
JUN	PIAS2
JUN	MAPK1
JUN	MTA1
JUN	NEDD4
JUN	TRAF2
JUN	SIRT1
JUN	TAF4
JUN	KPNA2
JUN	CREB3
JUN	MDM2
JUN	PPARG
JUN	DNMT3L
POU1F1	NR1I2
POU1F1	NR1I3
POU1F1	PPARG
POU1F1	PPARA
POU1F1	VDR
POU1F1	MED1
POU1F1	NCOR1
AR	JUN
AR	CCND1
AR	GNB2L1
AR	GTF2F1
AR	GTF2H1
AR	FLNA
AR	NONO
AR	MED14
AR	CALR
AR	CREBBP
AR	NCOR1
AR	SMAD4
AR	CAV1
AR	HDAC1
AR	NR2C2
AR	BAG1
AR	NR2C1
AR	SUMO1
AR	NCOA3
AR	NCOA4
AR	RAC3
AR	DAP3
AR	PA2G4
AR	TGFB1I1
AR	FHL2
AR	NCOA1
AR	RNF4
AR	SMAD3
AR	TRIM24
AR	RANBP9
AR	SVIL
AR	MED1
AR	NR0B2
AR	MYBBP1A
AR	RNF14
AR	PAK6
AR	PIAS4
AR	PIAS2
AR	PNRC1
AR	UBE2I
AR	NCOA2
AR	NSD1
AR	PELP1
AR	PRPF6
AR	ZMIZ1
AR	CDK9
AR	PIAS1
AR	PNRC2
AR	BRCA1
AR	CTNNB1
AR	STAT3
AR	CDC25B
AR	KAT5
AR	KDM1A
AR	CDK6
AR	CASP1
AR	CDK1
AR	EGFR
AR	MAPK1
AR	SP1
AR	CASP3
AR	NCOR2
AR	UBE3A
AR	PTEN
AR	CASP7
AR	NRIP1
AR	PXN
AR	PRMT1
AR	CCNH
AR	PIAS3
AR	CDK7
AR	PSMC3IP
AR	DCAF6
AR	XRCC6
AR	KAT2B
AR	EP300
AR	WIPI1
AR	TRIP4
AR	JMJD1C
AR	CASP8
AR	SRC
AR	STUB1
AR	CUL4B
AR	GRIP1
AR	TCF4
AR	GSK3B
AR	CALM1
AR	KIF1A
AR	ESR1
AR	FOXO1
AR	NR3C1
AR	GAPDH
AR	HSP90AA1
AR	HMGB1
AR	NFKB1
AR	RELA
AR	POU2F1
AR	RAF1
AR	MDM2
AR	NCOA6
AR	HDAC3
AR	HDAC4
AR	TDG
AR	YWHAQ
AR	POU2F2
AR	CEBPA
AR	CEBPB
AR	TBP
AR	WHSC1
AR	SMARCA2
AR	SMARCA4
AR	ZBTB16
AR	MED24
AR	SMARCD1
AR	KIFAP3
AR	SIRT1
AR	SMARCE1
AR	SREBF1
AR	SFPQ
AR	TADA3
AR	NELFCD
AR	CHD8
AR	LCOR
AR	PAX6
AR	ARID5A
AR	TCF20
AR	PTGES3
AR	REL
AR	VCP
AR	ZNF451
AR	PRKG1
AR	SUV39H2
CREBBP	JUN
CREBBP	GLI3
CREBBP	PRKCD
CREBBP	DDX5
CREBBP	PTMA
CREBBP	TP53
CREBBP	FOXO4
CREBBP	RPS6KA3
CREBBP	CITED1
CREBBP	GATA1
CREBBP	HNF4A
CREBBP	SREBF2
CREBBP	STAT1
CREBBP	KPNA2
CREBBP	TDG
CREBBP	RPS6KA1
CREBBP	NCOA3
CREBBP	MAFG
CREBBP	KAT2A
CREBBP	KHDRBS1
CREBBP	NCOA1
CREBBP	EP300
CREBBP	RBBP4
CREBBP	TRIP4
CREBBP	NCOA6
CREBBP	HIPK2
CREBBP	KAT2B
CREBBP	THRA
CREBBP	POLR2A
CREBBP	PELP1
CREBBP	NLK
CREBBP	YWHAH
CREBBP	PML
CREBBP	CSNK2A1
CREBBP	CTNNB1
CREBBP	STAT3
CREBBP	RPS6KA5
CREBBP	CTBP1
CREBBP	SMAD3
CREBBP	SMAD2
CREBBP	KAT5
CREBBP	RELA
CREBBP	FGFR1
CREBBP	SRF
CREBBP	H3F3A
CREBBP	SUV39H1
CREBBP	HDAC1
CREBBP	HDAC3
CREBBP	MSH6
CREBBP	MSH2
CREBBP	ZBTB17
CREBBP	TRIP10
CREBBP	MYC
CREBBP	CRX
CREBBP	DACH1
CREBBP	E2F1
CREBBP	ETS1
CREBBP	FHL2
CREBBP	GMEB1
CREBBP	HOXB9
CREBBP	HOXA10
CREBBP	HOXB1
CREBBP	HOXD4
CREBBP	HOXD10
CREBBP	MDC1
CREBBP	MDM2
CREBBP	IKBKG
CREBBP	SND1
CREBBP	PAX5
CREBBP	PIAS1
CREBBP	POU1F1
CREBBP	SPI1
CREBBP	RBCK1
CREBBP	SMAD4
CREBBP	SOX9
CREBBP	SREBF1
CREBBP	GTF2B
CREBBP	NCOA2
CREBBP	VDR
CREBBP	TCF3
CREBBP	SERTAD1
CREBBP	CALCOCO1
CREBBP	MED25
CREBBP	ESR1
CREBBP	EWSR1
CREBBP	FOXO1
CREBBP	NR3C1
CREBBP	HNF1A
CREBBP	HOXA9
CREBBP	HOXB7
CREBBP	HTT
CREBBP	MGMT
CREBBP	KMT2A
CREBBP	RBBP7
CREBBP	XRCC6
CREBBP	PPARG
CREBBP	PPARGC1A
CREBBP	HIST3H3
CREBBP	HIST4H4
CREBBP	REL
CREBBP	DDX17
CREBBP	HIST1H3A
CREBBP	HIST1H4A
CREBBP	HMGB1
CREBBP	PBX1
CREBBP	HBP1
CREBBP	FOXO3
CREBBP	LYN
CREBBP	HCK
CREBBP	SRC
CREBBP	RAD23A
CREBBP	IKBKB
CREBBP	UBE2D1
CREBBP	UBE2I
CREBBP	MAPK3
CREBBP	EID1
CREBBP	MAPK1
CREBBP	PCNA
CREBBP	SUMO1
CREBBP	GATA3
SMAD4	SKIL
SMAD4	TDG
SMAD4	PRPF40A
SMAD4	ATF7IP
SMAD4	HMG20A
SMAD4	MAPK13
SMAD4	MAPK1
SMAD4	SPTBN1
SMAD4	FOXO4
SMAD4	CITED1
SMAD4	UBE2L3
SMAD4	COPS5
SMAD4	UBE2I
SMAD4	PIAS3
SMAD4	PIAS1
SMAD4	PAK1
SMAD4	SQSTM1
SMAD4	UBB
SMAD4	STUB1
SMAD4	TGFBR1
SMAD4	SMAD9
SMAD4	SP1
SMAD4	CTCF
SMAD4	PIAS2
SMAD4	ERBB2IP
SMAD4	PIAS4
SMAD4	MAX
SMAD4	PAPPA2
SMAD4	SKI
SMAD4	SKP2
SMAD4	YY1
SMAD4	ZMIZ1
SMAD4	NELFCD
SMAD4	RELA
SMAD4	NR0B2
SMAD4	CYFIP2
SMAD4	NLK
SMAD4	OTUB1
SMAD4	LMO4
SMAD4	BCAS3
SMAD4	DKK3
SMAD4	FAM84B
SMAD4	IL24
SMAD4	LYPD3
SMAD4	SERPINB5
SMAD4	DNMT3L
PIN1	PTPN1
PIN1	UBB
PIN1	TP53
PIN1	POLR2A
PIN1	UBQLN4
PIN1	RAF1
PIN1	NCOA3
PIN1	TRAF2
PIN1	SOCS3
PIN1	GGA2
PIN1	RBPMS
PIN1	ZCCHC10
PIN1	RELA
PIN1	RPS6KB1
PIN1	RARA
PIN1	TSC2
PIN1	WIZ
PIN1	LRIF1
[truncated: 13,360 more rows]

## Sheet: Panic Disorder-PPIs
Protein 1	Protein 2
MYH6	POLR2A
MYH6	CALCOCO1
ISOC1	CALCOCO1
SECISBP2L	DYNLL2
KRTAP5-9	FAM161A
KRTAP5-9	WDYHV1
KRTAP5-9	NTM
KRTAP5-9	RGS20
KRTAP5-9	TYRO3
KRTAP5-9	MEOX2
KRT40	ARSI
KRT40	CWF19L2
ATP12A	NPY
ATP12A	GNAI3
KLK8	ZDHHC17
LAMC3	PELI2
LAMC3	POT1
CHERP	WBP4
CHERP	RBM23
CHERP	PRPF40A
CYP2C18	PSEN1
CYP2C18	ECSIT
CYP2C8	RIN3
CYP2C8	RNF32
CYP2C8	PSEN1
CYP2C8	ECSIT
CYP2C8	IFIT3
CYP2C8	MAST1
CYP2C8	LONP1
LONP1	RNF32
LONP1	MAST1
LONP1	LOXL4
LONP1	IFIT5
LONP1	ECSIT
LONP1	CDC37
NTM	KRTAP3-2
NTM	NEGR1
HMBOX1	DYNLL2
HMBOX1	FAM161A
CWC15	CTNNBL1
TBC1D15	CEP63
GABRA6	UBQLN1
REEP5	ARFGAP1
REEP5	VKORC1
REEP5	RABAC1
HRSP12	DEAF1
HRSP12	TRIB3
ASIC1	ATXN3
ASIC1	PICK1
ASIC1	PRKACA
SRSF1	SRPK2
SRSF1	TOP1
SRSF1	SNRNP70
SRSF1	SRPK1
KMT2A	TOP1
KMT2A	POLR2A
BAG6	CD93
BAG6	TP63
BAG6	PRPF40A
BAG6	UBQLN4
BAG6	KLHL12
BAG6	XRN1
ACE	MYH9
KRT31	WDYHV1
KRT31	INPP5K
KRT31	LMO4
KRT31	SMARCE1
KRT31	PIN1
NDUFB10	XRN1
HLA-DMA	HLA-DRB1
HLA-DMA	HLA-DRA
GLO1	PJA1
GLO1	MEOX2
GLO1	MAP3K13
GLO1	IKBKG
IDE	UBC
IDE	PEX5
IDE	UCHL5
IDE	INS
GAL	GPR151
GALR1	GAL
ADA	PIAS2
ADA	TINF2
ADA	DPP4
ADA	GRB2
ADA	ADORA2A
MYO5A	BMF
MYO5A	DLGAP1
MYO5A	DYNLL2
MYO5A	DYNLL1
LDHA	MAPK10
LDHA	YWHAQ
LDHA	UPF2
LDHA	LDHB
LDHA	PAXIP1
LDHA	POT1
LDHA	ACD
LDHA	TINF2
LDHA	TERF1
LDHA	PCNA
LDHA	XRN1
LDHA	DYNLL1
LDHA	ABCC9
LDHA	NDRG1
HLA-DRA	43525
HLA-DRA	PRPF40B
HLA-DRA	HLA-DRB1
HLA-DRA	MBP
TACR1	TAC4
TACR1	GPRASP1
DAO	EP300
DAO	PEX5
DAO	DAOA
IPP	CALCOCO1
IFIT5	RNF32
IFIT5	ECSIT
SGCE	CWC15
SGCE	ARIH2
UBE2W	CADPS2
FARSA	RNF32
FARSA	ECSIT
MRPL28	HMBOX1
MRPL28	TRAF3IP2
DEAF1	PELI2
DEAF1	CDC37
DEAF1	ASCC2
DEAF1	INTS1
DSC1	UCHL5
DSC1	DSG1
DSC1	PKP1
DSC1	DSP
NIPSNAP1	TBC1D17
TAC3	UBC
TAC3	TACR1
TAC3	GPRASP1
DNMT1	YWHAQ
DNMT1	GSK3B
DNMT1	USP7
DNMT1	MECP2
DNMT1	DYNLL1
DNMT1	HDAC1
DNMT1	RB1
DNMT1	PCNA
DNMT1	HMGB1
DNMT1	TRIM27
ALB	APP
ALB	TK1
ALB	LRP2
ALB	APOE
ALB	NR5A2
ALB	ST13
NPY	UBQLN1
NPY	BAG6
NPY	NR1H2
NPY	NPFFR2
NPY	NPFF
NPY	GHRL
NPY	NPY5R
NPY	PMCH
NPY	NPY2R
NPY	NPY1R
NPY	PPYR1
PPYR1	PYY
IL10RA	IL10RB
IL10RB	UCN2
IL10RB	UCN3
AZI2	TICAM1
PRDX2	NLGN3
PRDX2	COPS5
PRDX2	YWHAZ
PRDX2	RNF32
PRDX2	MAST1
PRDX2	IFIT5
PRDX2	ECSIT
PRDX2	CDC37
PRDX2	SUMO4
CRP	MAPK1
CRP	LAMC3
CRP	MAPK3
CRP	SNRNP70
ELN	MAGEH1
ELN	FKBP10
ELN	NID2
ELN	FCN1
ELN	PRTN3
ELN	SPINK1
ELN	MFAP2
ELN	LGALS3
ELN	LOX
ELN	LYZ
ELN	FBLN2
ELN	FBLN1
ELN	FBN1
ELN	LOXL1
ELN	FBN2
CD22	SHC1
CD22	PTPN6
CD22	PLCG1
CD22	PTPRC
CD22	HP
CD22	GRB2
IL7R	GNB2L1
IL7R	SNRNP70
IL7R	YBX1
IL7R	TOP1
MTUS2	CWF19L2
MTUS2	FAM161A
MTUS2	WDYHV1
MTUS2	CDKL3
CEP63	FAM161A
THAP10	DYNLL2
DNAL4	DYNLL2
HAAO	POT1
RCBTB2	UBE2I
RCBTB2	PDE4B
GPRIN2	RHOU
GPRIN2	DYNLL2
TBC1D17	ASCC2
CRYBA2	TRIP13
CRYBA2	CALCOCO1
LOXL4	RNF32
AKR1C3	LRIF1
AKR1C3	ZHX1
AKR1C3	UBE2W
AKR1C3	ACIN1
AKR1C3	C1orf103
MAGEA12	UBE3A
MAGEA12	NPPA
CTNNBL1	CALCOCO1
ZBTB48	UPF2
ZBTB48	RGS2
ZBTB48	NUDT21
IFIT3	RNF32
IFIT3	ECSIT
IFIT3	MAST1
IFIT3	LONP1
IFIT3	IFIT5
IFIT3	CDC37
KRT15	SMARCB1
KRT15	MORN3
KRT15	LMO4
KRT15	SMARCE1
KRT15	CALCOCO1
KRT15	SMARCD1
GLUL	RBBP6
GLUL	PIAS3
GLUL	CASP8AP2
GLUL	PIAS2
GLUL	PIAS1
GLUL	UBE2I
GLUL	SKIL
GLUL	HTR2A
GLUL	DYNLL1
FOSL1	DNMT3L
FOSL1	TRIM24
FOSL1	CALCOCO1
WDYHV1	NPL
WDYHV1	KLHL12
PCBD1	TFF3
PCBD1	ACIN1
PCBD1	CALCOCO1
PCBD1	SMARCD1
PCBD1	WDYHV1
NINL	FAM161A
NINL	APEX2
MAGEA11	RBM23
MAGEA11	WDYHV1
MAGEA11	BCL2L11
MAGEA11	NOS3
MAGEA11	PDE4B
MAGEA11	MAPK3
MAGEA11	TRIM27
MAGEA11	AKR1C3
CYLD	IKBKE
CYLD	TBK1
CYLD	DLG4
CYLD	UBC
CYLD	TRAF2
CYLD	IKBKG
PTK7	MTMR10
PTK7	MTMR9
PTK7	MTMR6
PTK7	MTMR1
PTK7	TPTE2
PTK7	TPTE
PTK7	CDC14A
PTK7	STYX
PTK7	DUPD1
PTK7	DUSP26
PTK7	DUSP21
PTK7	DUSP19
PTK7	DUSP18
PTK7	DUSP15
PTK7	DUSP14
PTK7	DUSP10
PTK7	PTPN12
PTK7	PTPN11
PTK7	PTPN7
PTK7	PTPN6
PTK7	PTPRR
PTK7	CTDSP2
PTK7	ILKAP
PTK7	PPM1K
PTK7	PPM1F
PTK7	CLNK
NPY5R	NUPR1
NPY5R	RNF181
NPY5R	PYY
NPY1R	ATP13A2
NPY1R	PYY
SLC6A2	STX1A
GCDH	MAST1
GCDH	RNF32
GCDH	PSEN1
GCDH	NOS3
GCDH	ECSIT
GCDH	CDC37
CLTA	RGS2
CLTA	EGFR
CLTA	HSPA8
AKR1C1	TFF3
AKR1C1	PTPN3
AKR1C1	COMMD8
AKR1C1	MAPK3
POU2F2	TBP
NPY2R	PYY
LDHB	PTEN
LDHB	PEX5
LDHB	POT1
LDHB	TERF1
LDHB	SUMO4
IL10	IL10RA
IL10	IL10RB
CKMT2	ELN
CKMT2	LRIF1
CKMT2	C1orf103
MAOA	NDRG1
CTAG1B	UBQLN1
CTAG1B	HLA-DRB1
MAGEA1	SNW1
HP	MVP
HP	WASL
HP	TP63
HP	TBL1X
HP	SMAD3
HP	LAMC3
HP	RPL11
HP	TGM2
HP	GADD45G
HP	VKORC1
HP	RBBP6
HP	CD163
HP	ITGB2
HP	ADAMTS4
HP	ITGAM
HP	C1RL
KRT14	PKP1
MSX1	RGS7
MSX1	TBP
MSX1	POU2F1
MSX1	PIAS1
FBN2	SMAD2
FBN2	MFAP2
CSF1	SGTA
CSF1	HLA-B
DCN	FBN1
DCN	EGFR
DCN	ELN
CCKBR	NTM
CCKBR	ATP13A2
CCKBR	PPP1R9B
CCKBR	PTPN11
GLRB	GPHN
CCKAR	PPP1R9B
CCKAR	CCKBR
GCK	PCNA
GCK	INS
FBLN2	FBN1
HBB	UCHL5
HBB	HP
ARIH2	DISC1
ARIH2	KIAA1377
BMI1	PGR
BMI1	CSNK2A1
BMI1	TRIM27
BMI1	MAPK14
BMI1	USP7
BMI1	UBE2I
BMI1	LRIF1
BMI1	KMT2A
BMI1	KIAA1377
BMI1	C1orf103
CNTF	KRT40
CNTF	TRIP6
A2M	TGM2
A2M	TYRO3
A2M	FBXL12
A2M	CDC37
A2M	MAST1
A2M	CYP2C18
A2M	CYP2C8
A2M	LONP1
A2M	GCDH
A2M	ECSIT
A2M	PRDX2
A2M	RHEB
A2M	IFIT3
A2M	FARSA
A2M	PRAM1
A2M	RNF32
A2M	IFIT5
A2M	PAXIP1
A2M	NOS3
A2M	APP
A2M	CDKN1A
A2M	TK1
A2M	RAP1B
A2M	NUDT21
A2M	GRB2
A2M	ATF7IP
A2M	LCAT
A2M	HSPA5
A2M	IL10
A2M	CTSE
A2M	CTSB
A2M	B2M
A2M	LRP1
A2M	APOE
A2M	LYZ
A2M	SHBG
GNB1	DISC1
GNB1	GNG2
GNB1	GNB2L1
GNB1	MTNR1A
FBXL12	RNF32
RBM23	KIAA1377
DSP	PTEN
DSP	UCHL5
DSP	PRKCE
DSP	PKP1
DSP	PRKACA
DSP	VIM
DSP	KRT1
DSG1	PKP1
CREB1	DNMT3L
CREB1	NR5A2
CREB1	GSK3A
CREB1	YY1
CREB1	PPP1CA
CREB1	POU2F1
CREB1	HDAC1
CREB1	EP300
CREB1	ATF7IP
CREB1	ZHX1
CREB1	PIAS1
CREB1	UBE2I
CREB1	PRKACA
CREB1	PRKG1
CREB1	FHL5
CREB1	GSK3B
CREB1	KCNIP3
CREB1	MAPK14
CREB1	CREBBP
CREB1	RPS6KA3
CREB1	CREM
CREB1	VIM
PSEN1	ST13
PSEN1	RNF32
PSEN1	RHEB
PSEN1	PRDX2
PSEN1	PDCD4
PSEN1	FBXL12
PSEN1	PRAM1
PSEN1	CDC37
PSEN1	ECSIT
PSEN1	BACE1
PSEN1	UBQLN1
PSEN1	KCNIP3
PSEN1	SFRS2IP
GLP1R	GNAS
GLP1R	GABBR2
GLP1R	GPRASP1
ARF1	HTR2A
ARF1	GGA3
ARF1	ARFGAP1
ARF1	CYTH2
ARF1	COPB1
ARF1	INSR
ARF1	PICK1
ADRA2A	GGA3
ADRA2A	SNTA1
ADRA2A	GNG2
ADRA2A	GNB1
ADRA2A	UCHL1
ADRA2A	PPP1R9B
ADRA2A	EIF2B1
ADRA2A	YWHAZ
ADRA2A	PRKCD
ADRA2A	GNAI2
ADRA2A	GNAO1
ADRA2A	GNAI1
ADRA2A	ADRBK1
ADRA2A	ADRB1
DUSP13	CALCOCO1
DUSP13	SMURF1
GNAZ	RGS20
GNAZ	RGS7
GNAZ	PRKCD
KRT8	KRT40
KRT8	KRT31
KRT8	KRT15
KRT8	IKBKG
KRT8	PKP1
KRT8	MAPK3
KRT8	PKD1
KRT8	MAPK8
KRT8	MAPK1
IGF1R	PCNA
IGF1R	RELA
IGF1R	STYX
IGF1R	DUPD1
IGF1R	DUSP26
IGF1R	DUSP21
IGF1R	DUSP19
IGF1R	DUSP18
IGF1R	DUSP15
IGF1R	DUSP14
IGF1R	DUSP10
IGF1R	ILKAP
IGF1R	PPM1A
IGF1R	PTPN12
IGF1R	PTPN7
IGF1R	PTPN6
IGF1R	PTPRR
IGF1R	KCNIP3
IGF1R	RPL11
IGF1R	SHC1
IGF1R	DOK5
IGF1R	NEDD4
IGF1R	YWHAB
IGF1R	YWHAZ
IGF1R	SRC
IGF1R	PTPN1
IGF1R	PTPN11
IGF1R	INS
IGF1R	UBC
IGF1R	GNB2L1
IGF1R	JAK2
IGF1R	INSR
IGF1R	PRKCD
AGT	MME
AGT	ACE
AGT	GRB2
AGT	MEP1A
AGT	AGTR2
AGT	ENPEP
AGT	EWSR1
POU2F1	PRKDC
POU2F1	PRKACA
POU2F1	NCOR2
POU2F1	TBP
POU2F1	RELA
MYH9	UBE2I
MYH9	PPP2CA
MYH9	YWHAZ
MYH9	CD163
MYH9	ASCC2
MYH9	PTPN6
CDC27	COMT
CDC27	PTEN
CDC27	CKS1B
CDC27	RB1
CDC27	SMAD3
CDC27	MAD2L1
CDC27	SMAD2
CDC27	PIN1
CDC27	PPP5C
CDC27	SKIL
CKS2	CCNA1
CKS2	HSP90AA1
CKS2	CDC37
CKS2	LDHB
CKS2	GRB2
CKS1B	TCF4
CKS1B	TRIM27
CKS1B	KRTAP5-9
CKS1B	CDC37
CKS1B	HSP90AA1
CKS1B	CCNA1
CKS1B	LDHB
CKS1B	CKS2
TK1	PJA1
TK1	UPF2
TK1	ARFGAP1
TK1	BAG6
TK1	IER3IP1
TK1	INPP5K
TK1	USP4
TK1	DEAF1
TK1	LRIF1
TK1	C1orf103
TK1	COPS6
CTSE	BAG6
CTSE	INS
UCHL5	PJA1
BZRAP1	MVP
BZRAP1	CADPS2
BZRAP1	DISC1
MTMR6	MTUS2
MTMR6	MTMR9
COMT	GLP1R
COMT	MTNR1A
COMT	KRT40
COMT	KRT31
COMT	KRTAP5-9
COMT	VKORC1
COMT	RGS2
COMT	ACE
COMT	LITAF
COMT	TRIP13
COMT	XRN2
DBI	NIPSNAP1
DBI	GSK3B
DBI	RAD23B
TSPO	CREB3L1
TSPO	BZRAP1
TSPO	DBI
UBC	XRCC5
UBC	MVP
UBC	TBC1D15
UBC	ASCC2
UBC	RNF181
UBC	SMURF1
UBC	IKBKE
UBC	UBQLN4
UBC	SMURF2
UBC	GTF2IRD1
UBC	BCAS2
UBC	ZHX1
UBC	ARIH2
UBC	UBE3A
UBC	EPN2
UBC	CUEDC2
UBC	UCHL5
UBC	USP4
UBC	UBR5
UBC	UBQLN1
UBC	USP7
UBC	SQSTM1
UBC	TRAF3IP2
UBC	IKBKG
UBC	ANKS1B
UBC	GGA3
UBC	UCHL1
UBC	YWHAZ
UBC	YWHAB
UBC	RNF11
GTF2IRD1	ATF7IP
NPFF	ZDHHC17
NPFF	NPFFR2
DYNLL2	CCDC36
DYNLL2	C12orf40
DYNLL2	MORN3
CYTH3	CALCOCO1
LGALS3	PAXIP1
TOP1	XRCC5
TOP1	SNW1
TOP1	UBE2I
LIG1	RGS2
LIG1	PCNA
CREM	DNMT3L
CREM	PIAS3
CREM	UBE2I
CREM	SP100
CREM	EMP3
CREM	CASP8AP2
CREM	ATXN1
CREM	MAPK3
CREM	HDAC1
CREM	CREB3L1
CREM	TAF4
CREM	GSK3A
CREM	FHL5
CREM	GSK3B
CREM	KCNIP3
CREM	PRKACA
CREM	CSNK1A1
CREM	TBP
CREM	PRKCA
CREM	SPI1
CREM	CSNK2A2
CREM	CSNK2A1
CDKN1A	FBXL12
CDKN1A	PRKACA
CDKN1A	MAPK14
CDKN1A	TCF4
CDKN1A	KRT31
CDKN1A	NR1H2
CDKN1A	NOV
CDKN1A	YWHAQ
CDKN1A	TUBB2B
CDKN1A	NGFR
CDKN1A	LRIF1
CDKN1A	GNB5
CDKN1A	INPP5K
CDKN1A	DYNC1I1
CDKN1A	CTSB
CDKN1A	USP4
CDKN1A	COPS6
CDKN1A	VIM
CDKN1A	ZBTB48
CDKN1A	DEAF1
CDKN1A	BAG6
CDKN1A	ATXN3
CDKN1A	IKBKG
CDKN1A	EP300
CDKN1A	HDAC1
CDKN1A	ESR1
CDKN1A	GNB2L1
CDKN1A	GADD45G
CDKN1A	CCNA1
CDKN1A	MAPK8
CDKN1A	TK1
CDKN1A	RB1
CDKN1A	PCNA
CDKN1A	XRCC6
CDKN1A	CSNK2A1
GABRB3	MEOX2
GABRB3	UBQLN1
GABRB3	PRKACA
GABRB3	PRKCA
GABRB3	ARFGEF2
GABRB3	PPP2CA
GABRB3	GNB2L1
GABRB3	AKAP5
NR5A2	NCOA1
NR5A2	UBE2I
NR5A2	NCOA3
NR5A2	NPPA
LOXL1	ATXN1
TRIP13	MORN3
TRIP13	MVP
TRIP13	KRTAP3-2
TRIP13	GPRIN2
TRIP13	LOXL4
TRIP13	WDYHV1
CPE	LRIF1
CPE	C1orf103
CPE	PMCH
CPE	INS
CCK	ENPEP
CCK	MEP1B
CCK	MEP1A
CCK	CCKBR
CCK	CCKAR
CCK	CPE
GNAO1	RGS20
GNAO1	RGS7
IKBKE	TRAF3IP2
IKBKE	TBK1
IKBKE	SIKE1
IKBKE	AZI2
IKBKE	TICAM1
IKBKE	CDC37
IKBKE	TANK
GNAI1	PTEN
GNAI1	GNB1
GNAI1	RGS7
GNAI1	HTR2A
GNAI1	IGF1R
GNAI1	GNAO1
GNAI1	MTNR1A
GNAI1	RGS20
IRF5	TRIM21
IRF5	SGTA
IRF5	NCOR2
IRF5	SIN3A
IRF5	TBK1
IRF5	IKBKE
ARID1A	NCOA1
ZBED1	UCHL5
MAGEH1	HMBOX1
KLF9	SIN3A
KLF9	PGR
PEPD	USP7
PEPD	SPP1
PEPD	TERF1
PEPD	ATXN1
RORB	UBE2I
RORB	NCOA1
FHL5	DNAL4
FKBP5	HSP90AA1
FKBP5	IKBKE
FKBP5	PGR
PPM1F	FAM161A
NME3	UBQLN1
NME3	SGTA
NME3	UBQLN4
TCF3	UBE2I
TCF3	KAT2B
DNAJA1	PGR
DNAJA1	PTEN
DNAJA1	PAXIP1
DNAJA1	SUMO4
DNAJA1	HSPA8
RPL11	KRT40
RPL11	ARFGAP1
CALCR	SQSTM1
CALCR	GPRASP1
CALCR	LRP1
CALCR	CALM1
CALCR	MBL2
LITAF	UBQLN1
RNF11	SMURF1
RNF11	UBQLN4
RNF11	ASCC2
RNF11	SMURF2
ATP7B	HP
PPP3CB	PTK7
GABRA1	UBQLN1
GABRA1	PRKCG
GABRA1	PRKCD
GABRA1	PPP3CA
PPP3CA	PTK7
PPP3CA	KCNIP3
PPP3CA	AKAP5
CRH	KRT31
CRH	CRHR1
CRH	CRHR2
KRT1	NINL
KRT1	KRT15
KRT1	UBE3A
KRT1	PRKCE
KRT1	MBL2
KRT1	YWHAQ
BMF	DYNLL2
SKI	UBE2I
SKI	SPI1
SKI	SIN3A
SKI	HIPK2
SKI	SNW1
SKI	NCOR1
SKI	SKIL
GRIK2	CALCOCO1
GRIK2	PICK1
PRKCSH	PTPRC
PRKCSH	RGS2
GNAI2	PTEN
GNAI2	KRT40
GNAI2	RGS20
GNAI2	TRIP6
GNAI2	KRT31
GNAI2	GNB1
GNAI2	MTNR1A
GNAI2	IGF1R
LMO4	KRT40
LMO4	DEAF1
GABARAPL2	CALCOCO1
GABARAPL2	AGTRAP
GABARAPL2	ARFGAP1
PGR	SGTA
PGR	PRKDC
PGR	XRCC5
PGR	ANP32A
PGR	KAT2B
PGR	COPS5
PGR	CCNA1
PGR	TAF1B
PGR	ARID1A
PGR	SMARCE1
PGR	NCOR2
PGR	PIAS2
PGR	RNF4
PGR	DAP3
PGR	POU2F2
PGR	TDG
PGR	SMARCD1
PGR	POU2F1
PGR	RELA
PGR	CUEDC2
PGR	SNW1
PGR	SORBS1
PGR	APEX2
PGR	BATF3
PGR	SRC
PGR	JDP2
PGR	NCOA3
PGR	PIAS1
PGR	PIAS3
PGR	ZBTB17
PGR	RBM39
PGR	RBM23
PGR	BCAS2
PGR	DDX54
PGR	UBR5
PGR	TRIM24
PGR	NCOA1
PGR	UBE3A
DYNC1I1	PIN1
DYNC1I1	TK1
DYNC1I1	GRB7
DYNC1I1	NUDT21
DYNC1I1	DNM2
DYNC1I1	GSK3B
DYNC1I1	DYNLL2
DYNC1I1	DYNLL1
MAD2L1	TRIP13
MAD2L1	RABAC1
MAD2L1	MBL2
MAD2L1	NDC80
CCNA2	MAGEA11
CCNA2	MAD2L1
CCNA2	RB1
CCNA2	KAT2B
CCNA2	PGR
CCNA2	CDC20
CCNA2	CDKN1A
CCNA2	CDK2
CCNA2	CDK1
ATF1	DNMT3L
ATF1	CREM
ATF1	PRKACA
ATF1	CAMK2G
ATF1	CREBBP
ATF1	SPI1
ATF1	JUN
ATF1	CREB1
ATF1	CSNK2A2
ATF1	CSNK2A1
ATF1	BRCA1
BRCA1	SQSTM1
BRCA1	TOP1
BRCA1	NCOA1
BRCA1	CWF19L2
BRCA1	FAM161A
BRCA1	TENC1
BRCA1	CLK2
BRCA1	HNRNPD
BRCA1	TRIM24
BRCA1	PEX5
BRCA1	TPTE2
BRCA1	SDK2
BRCA1	DNAJA1
BRCA1	DCN
BRCA1	UBE2W
BRCA1	PGR
BRCA1	XRCC5
BRCA1	PIAS1
BRCA1	UBE2I
BRCA1	UBC
BRCA1	UBE3A
BRCA1	PRKDC
BRCA1	HSPA8
BRCA1	NCOA3
BRCA1	SMARCA2
BRCA1	CCNA1
BRCA1	SMAD4
BRCA1	SMAD3
BRCA1	SMAD2
BRCA1	PPP1CA
BRCA1	PSAP
BRCA1	YY1
BRCA1	POU2F1
BRCA1	LMO4
BRCA1	POLR2A
BRCA1	EP300
BRCA1	CTBP1
BRCA1	HDAC1
BRCA1	STAT1
BRCA1	CREBBP
BRCA1	MYC
BRCA1	RB1
BRCA1	JUNB
BRCA1	JUN
BRCA1	RELA
BRCA1	JAK2
BRCA1	ESR1
BRCA1	CCNA2
BRCA1	CDK2
BRCA1	CDK1
BRCA1	CSNK2A1
TRIM27	SMARCB1
TRIM27	CWF19L2
TRIM27	RBM23
TRIM27	WDYHV1
TRIM27	CDKL3
TRIM27	NUDT21
TRIM27	MTMR6
TRIM27	MVP
TRIM27	TRIM21
TRIM27	ARIH2
TRIM27	USP7
TRIM27	UCHL5
TRIM27	TBK1
TRIM27	IKBKE
TRIM27	PIAS2
TRIM27	PIAS3
TRIM27	PIAS1
TRIM27	UBE2W
TRIM27	UBE2I
TRIM27	PRAM1
HNRNPD	MYC
HNRNPD	IL7R
HNRNPD	SNRPC
HNRNPD	MEOX2
HNRNPD	MAPK6
HNRNPD	HSPB1
HNRNPD	LDHA
HNRNPD	UBE2I
HNRNPD	YBX1
HNRNPD	SUMO4
HNRNPD	PRKACA
CDC25B	MAPK9
CDC25B	CDC14A
CDC25B	CDK2
CDC25B	PGR
CDC25B	MAPK14
CDC25B	KAT2B
CDC25B	YWHAB
CDC25B	YWHAZ
CDC25B	CREBBP
CDC25B	YWHAQ
CDC25B	ESR1
CDC25B	CSNK2A1
CDC25B	YWHAH
NTF3	NTRK2
NTF3	NTRK3
ESR1	MYH6
ESR1	DNMT3L
ESR1	ARID1A
ESR1	PRKCSH
ESR1	PPP2R1A
ESR1	PPP1CA
ESR1	KRT8
ESR1	HSPB1
ESR1	HNRNPD
ESR1	HNRNPA2B1
ESR1	FARSA
ESR1	NUDT21
ESR1	GNB2L1
ESR1	POLR2A
ESR1	HSPA8
ESR1	PPP5C
ESR1	SKIL
ESR1	DDX17
ESR1	SMURF1
ESR1	LRIF1
ESR1	TAF1B
ESR1	LMO4
ESR1	HDAC1
ESR1	PIAS2
ESR1	DAP3
ESR1	POU2F2
ESR1	YWHAQ
ESR1	FKBP5
ESR1	SMARCD1
ESR1	PTEN
ESR1	PIAS1
ESR1	DDX54
ESR1	RBM39
ESR1	PRMT2
ESR1	HSP90AB1
ESR1	MVP
ESR1	GADD45G
ESR1	TRIM24
ESR1	SMARCE1
ESR1	NCOA1
ESR1	PAK1
ESR1	NCOA3
ESR1	TDG
ESR1	SMAD2
ESR1	NCOR1
ESR1	NCOR2
ESR1	SHC1
ESR1	TBP
ESR1	SMARCA2
ESR1	RPS6KA3
ESR1	SRC
ESR1	MAPK1
ESR1	PTPN1
ESR1	PTPN6
ESR1	JUN
ESR1	POU2F1
ESR1	HSP90AA1
ESR1	NPPA
ESR1	CUEDC2
ESR1	PGR
ESR1	ZBTB17
ESR1	PIAS3
ESR1	UBE2I
ESR1	GTF2B
ESR1	COPS5
ESR1	SMAD3
ESR1	RNF4
ESR1	MAPK3
ESR1	PRKACA
ESR1	SMAD4
ESR1	HNF4A
ESR1	RELA
ESR1	IGF1R
ESR1	GNAI1
ESR1	GRB2
ESR1	RBM23
ESR1	JUNB
ESR1	BCAS2
ESR1	YWHAH
NCAM1	RHEB
NCAM1	ATXN1
NCAM1	UCHL1
NCAM1	PPP1CA
NCAM1	PLCG1
NCAM1	PRNP
BDNF	RHOU
BDNF	INPP5K
BDNF	JUNB
BDNF	F11R
BDNF	AGO3
BDNF	CADPS2
BDNF	SORT1
BDNF	CPE
BDNF	MBTPS1
BDNF	NTRK2
BDNF	NOS3
BDNF	NTF3
BDNF	ESR1
BDNF	NCAM1
NOS3	HTRA1
NOS3	ST13
NOS3	PSEN1
NOS3	PAXIP1
NOS3	RNF32
NOS3	MAST1
NOS3	CDC37
GALR2	GAL
ECSIT	FBXL12
ECSIT	RNF32
ECSIT	LOXL4
ECSIT	SMURF1
BMP6	SOSTDC1
BMP6	SMAD5
BMP6	NCOA3
TINF2	TXNDC17
TINF2	ACD
POT1	RHOU
POT1	TINF2
POT1	ACD
TERF1	ZHX1
TERF1	GIT1
TERF1	TINF2
TERF1	POT1
CRHR1	SRPK1
CRHR1	GNAS
CRHR1	GNAO1
CRHR1	GNAI1
CRHR1	UCN3
CRHR1	GNAQ
CRHR1	UCN
CRHR2	UCN3
CRHR2	UCN2
CRHR2	UCN
ARFGAP1	KRTAP3-2
AIMP2	SMURF2
AIMP2	BCAS2
AIMP2	TANK
AIMP2	NGFRAP1
AIMP2	KIAA1377
AIMP2	DEAF1
SRPK2	XRCC5
SRPK2	TOP1
SRPK2	SDK2
SRPK2	HTATSF1
SRPK2	CALCOCO1
SRPK2	CADPS2
SRPK2	HOMER3
SRPK2	CHERP
SRPK2	IFIT5
SRPK2	YWHAB
SRPK2	ZRANB2
SRPK2	ACIN1
SRPK2	CTNNBL1
SRPK2	RBM39
SRPK2	RBM23
SRPK2	PRPF40A
UBQLN1	NLGN3
UBQLN1	SMURF1
UBQLN1	GHRL
UBQLN1	TICAM1
UBQLN1	PRPF40A
UBQLN1	UBQLN4
ARL6IP1	PAM16
ARL6IP1	INPP5K
PIAS3	ATF7IP
PIAS3	PRPF40A
ELAVL1	IL7R
ELAVL1	PRKCE
ELAVL1	PRKCD
ELAVL1	PRKCA
ELAVL1	NOS3
ELAVL1	ANP32A
BMP7	MTUS2
BMP7	TRIM27
BMP7	KRTAP5-9
BMP7	SOSTDC1
BMP7	NCOA3
MTNR1A	KLHL12
MTNR1A	YWHAZ
MTNR1A	BAG6
MTNR1A	UBQLN1
MTNR1A	SNAPIN
MTNR1A	RBM39
MTNR1A	PAXIP1
MTNR1A	YWHAB
MTNR1A	GNB2L1
ITGAM	ITGB2
PPP2R1A	MAPK6
PPP2R1A	AIMP2
PPP2R1A	PRDX2
PPP2R1A	ARIH2
PPP2R1A	SLC6A2
PPP2R1A	PPP5C
PPP5C	CDC37
PPP5C	DISC1
BMP2	SOSTDC1
BIRC3	MBTPS1
BIRC3	IKBKE
BIRC3	IKBKG
BIRC3	UBC
BIRC3	UBE2I
BIRC3	TRAF2
BIRC2	PPM1K
BIRC2	WDYHV1
BIRC2	RNF181
BIRC2	IKBKE
BIRC2	UBC
BIRC2	UBE2W
BIRC2	IKBKG
BIRC2	MAGEA11
BIRC2	TRAF2
GPR26	HTR1A
S1PR3	GNAI1
S1PR3	GNAQ
S1PR3	HTR1A
HTR1A	GABBR2
HTR1A	HTR1D
HTR1A	HTR1B
MASP1	RPS6KA3
MASP1	NUDT21
KCNJ11	LDHA
KCNJ11	ABCC9
TBK1	SMURF1
TBK1	SIKE1
TBK1	AZI2
TBK1	TICAM1
CD1B	PSAP
HLA-B	STAT1
HLA-B	ARHGEF4
HLA-B	TRIB3
HLA-B	ATF7IP
HLA-B	LILRB2
HLA-B	KIR3DS1
HLA-B	KIR3DL1
HLA-B	LILRB1
HLA-B	KLRD1
HLA-B	MAGEA1
HLA-B	SRC
HLA-B	TRB
HLA-B	TRA
GNAS	GNB1
GNAS	RGS2
EIF2B1	WDYHV1
PEX5	POT1
PEX5	ACD
PEX5	TINF2
TAC1	BAG6
TAC1	TACR1
ID2	RHOU
ID2	TENC1
ID2	RIN3
ID2	MAPK8
ID2	MAPK3
ID2	MAPK1
ID2	LRIF1
ID2	TCF3
ID2	PPP1CA
ID2	RB1
ID2	C1orf103
ID2	TCF4
INSR	STYX
INSR	DUSP19
INSR	DUSP18
INSR	PTPRR
INSR	43525
INSR	SQSTM1
INSR	KRT31
INSR	DOK5
INSR	FRS2
INSR	SORBS1
INSR	MAPK3
INSR	MAD2L1
INSR	SMAD2
INSR	YWHAB
INSR	SHC1
INSR	PTPN12
INSR	PRKCD
INSR	PRKCA
INSR	PTPN1
INSR	PTPN6
INSR	PTPN11
INSR	PTPRC
INSR	GNB2L1
INSR	SRC
INSR	PLCG1
INSR	JAK2
GNA15	RGS2
GNA15	PRKCA
GNA11	MTNR1A
GNA11	HTR2A
TCF4	UBE2I
TCF4	BCAS2
TCF4	LMO4
TCF4	MVP
TCF4	BZRAP1
TCF4	TCF3
TCF4	XRCC5
ELK3	TOP1
ELK3	TCF3
ELK3	ID2
ELK3	PIAS1
ELK3	MAPK9
ELK3	MAPK8
MC4R	PRKACA
MC4R	NPY
SMURF1	DDX54
SMURF1	ASCC2
SMURF1	CALCOCO1
SMURF1	TRIB3
BDKRB2	ACE
BDKRB2	GRK5
BDKRB2	PRKCD
BDKRB2	PTPN11
BDKRB2	NOS3
BDKRB2	GNA11
PCMT1	AIMP2
PCMT1	VKORC1
PDE4B	SMURF2
PDE4B	DISC1
PDE4B	PRKACA
SGCB	SGCZ
RASGRF1	SRPK2
RASGRF1	SRC
RASGRF1	SNRNP70
RASGRF1	YWHAB
BCL2L11	NDRG1
BCL2L11	GNB2L1
BCL2L11	DYNLL2
MAST1	RNF32
MAST1	PRAM1
MAST1	LOXL4
MAST1	IFIT5
MAST1	FBXL12
MAST1	ECSIT
LBR	SRPK2
LBR	MECP2
LBR	SRPK1
CDC37	RNF32
CDC37	PRAM1
CDC37	LOXL4
CDC37	IFIT5
CDC37	FBXL12
CDC37	ECSIT
CDC37	TBK1
RNF4	ATXN1
RNF4	UBC
RNF4	SRPK2
RNF4	SKIL
RNF4	IKBKG
RNF4	UBE2I
RNF4	UBE2W
RNF4	TBP
ASS1	PTPN1
ASS1	JAK2
ASS1	USP4
ASS1	TERF1
ASS1	ELN
ASS1	ASCC2
GPHN	DYNLL2
GPRASP1	SNAPIN
DMD	HNF4A
DMD	DISC1
DMD	KRT8
DMD	SNTA1
DMD	CADPS2
DMD	SGCZ
NEDD4	GABARAPL2
NEDD4	SRC
NEDD4	NUDT21
NEDD4	ARID1A
NEDD4	TBK1
NEDD4	TAF1B
NEDD4	UBC
NEDD4	DDX54
NEDD4	RPS6KA3
NEDD4	CALCOCO1
NEDD4	YY1
NEDD4	SCN5A
NEDD4	POLR2A
NEDD4	PTEN
NEDD4	LITAF
NEDD4	RNF11
TRIM21	SQSTM1
TRIM21	GABARAPL2
TRIM21	UBE2I
TRIM21	UBC
TRIM21	CASP8AP2
TRIM21	YWHAZ
TRIM21	USP4
GNG2	SMURF2
TRAF3IP2	TBK1
TANK	CEP63
TANK	INPP5K
TANK	TBK1
PPM1B	PTK7
PPM1B	IKBKG
MBL2	MASP1
MBL2	PTPRC
MBL2	CD93
MBL2	MASP2
PJA1	DDX54
PJA1	ASCC2
FBN1	MFAP2
FBN1	FBN2
GRP	MEP1B
GRP	MEP1A
GRP	GRPR
B2M	CRYAB
B2M	GRB2
B2M	BAG6
B2M	CD8A
B2M	LILRB1
B2M	CD1B
B2M	HLA-B
B2M	CALR
TBL1X	UBE2I
TBL1X	TINF2
TBL1X	TERF1
TBL1X	TBL1XR1
TBL1X	NCOR1
TBL1X	NCOR2
PARK2	SQSTM1
PARK2	UCHL1
PARK2	TCF4
PARK2	IKBKG
PARK2	UBC
PARK2	PICK1
PARK2	YWHAH
PARK2	RGS2
PARK2	TRIP13
PARK2	AIMP2
FHL1	SRPK1
FHL1	SMAD4
FHL1	SMAD3
FHL1	SMAD2
FHL1	PRNP
FHL1	DEAF1
DDX3X	IKBKE
DDX3X	SRPK2
DDX3X	ESR1
DDX3X	PIN1
DDX3X	NEDD4
DDX3X	WBP4
DDX3X	YWHAQ
DDX3X	IL7R
NPR1	ATF7IP
NPR1	PRKG1
MME	PTEN
MME	NDRG1
MME	SHC1
MME	NPPA
NPPA	UBQLN1
NPPA	NPR2
NPPA	RORB
NPPA	NPR1
NPPA	UBQLN4
NPPA	NPR3
XIAP	SQSTM1
XIAP	GSK3B
XIAP	DNM2
XIAP	CDK1
XIAP	CKS1B
XIAP	BRCA1
XIAP	HTRA1
XIAP	ELAVL1
XIAP	UBC
XIAP	IKBKE
XIAP	TBK1
XIAP	PTEN
XIAP	UBE2I
XIAP	UBE2W
XIAP	WDYHV1
XIAP	DYNLL2
MECP2	TBL1X
MECP2	TBL1XR1
MECP2	DNMT3L
MECP2	RNF4
MECP2	SOX18
MECP2	HIPK2
MECP2	YY1
MECP2	CDKL5
MECP2	SPI1
MECP2	PRPF40B
MECP2	HIST2H3A
MECP2	SKI
MECP2	SMARCB1
MECP2	SMARCA2
MECP2	PRPF40A
MECP2	SIN3A
MECP2	NCOR1
RAD23B	UBC
RAD23B	DEAF1
RAD23B	UBE3A
RAD23B	TDG
ATXN1	EIF3F
ATXN1	FOSL1
ATXN1	LITAF
ATXN1	PIAS1
ATXN1	NCOR2
ATXN1	NCOR1
ATXN1	ZYX
ATXN1	UBE2I
ATXN1	TRIP6
ATXN1	TRAF2
ATXN1	KLHL12
ATXN1	ZHX1
ATXN1	NUDT21
ATXN1	ANP32A
ATXN1	UBQLN4
ATXN1	USP7
ATXN1	YWHAZ
FBLN1	NLGN3
FBLN1	YWHAQ
FBLN1	TANK
FBLN1	SMAD3
FBLN1	SKIL
FBLN1	SMAD4
FBLN1	NOV
ATXN3	SMURF1
ATXN3	SQSTM1
ATXN3	PJA1
ATXN3	TK1
ATXN3	PARK2
ATXN3	KAT2B
ATXN3	NCOR1
ATXN3	UBC
ATXN3	UBQLN1
ATXN3	RAD23B
ATXN3	PICK1
SH3GL3	CALCOCO1
SH3GL3	GABBR2
SH3GL3	TERF1
SH3GL3	WASL
SH3GL3	VIM
CRMP1	RGS2
CRMP1	SRC
CRMP1	TRIP13
CRMP1	HMGB1
CRMP1	TK1
CRMP1	VIM
PKP1	GTF2IRD1
PKP1	TENC1
PKP1	UCHL5
PKP1	VIM
AVPR1B	GRK5
GGA3	BACE1
GGA3	RNF11
UCHL1	TINF2
UCHL1	COPS5
NGFRAP1	CTNNBL1
BCAS2	KRT40
BCAS2	POT1
COPS6	TRIB3
COPS6	COPS5
PTEN	PTK7
PTEN	USP7
PTEN	UBC
PTEN	COPS6
PTEN	MAST1
PTEN	UBE2I
PTEN	MVP
PTEN	PXN
HNF4A	PRKACA
HNF4A	RNF4
HNF4A	TBP
HNF4A	MAPK1
HNF4A	MAPK3
HNF4A	NCOR2
HNF4A	PCBD1
HNF4A	UBE2I
HNF4A	COPS5
HNF4A	NPPA
HNF4A	NCOA1
HNF4A	TRIM24
HNF4A	SMAD3
HNF4A	SMAD2
HNF4A	SMAD4
CHUK	IFIT5
CHUK	UBC
CHUK	SRPK1
CHUK	SRPK2
CHUK	NCOR1
CHUK	TRIM27
CHUK	CSNK2A1
CHUK	IKBKE
CHUK	COPS5
CHUK	PRKCD
CHUK	PRKCA
CHUK	CUEDC2
CHUK	UBE2I
CHUK	IKBKB
CHUK	PIAS1
CHUK	IKBKG
CHUK	NCOR2
CHUK	HSP90AB1
CHUK	CREBBP
CHUK	SRC
CHUK	PRKCB
CHUK	PTPN11
CHUK	NFKBIA
CHUK	NCOA3
CHUK	RELA
CHUK	HSP90AA1
CHUK	FKBP5
CHUK	TANK
CHUK	ESR1
CHUK	TRAF3IP2
CHUK	CDC37
CHUK	TRAF2
CHUK	PRKDC
TP63	KAT2B
TP63	COPS6
TP63	GNB2L1
TP63	HIPK2
MAP1A	SPP1
MAP1A	UPF2
MAP1A	DISC1
RHEB	ARIH2
RHEB	RABAC1
RHEB	ECSIT
TPH1	YWHAH
TPH1	YWHAZ
HSPB1	YWHAZ
HSPB1	YWHAQ
HSPB1	YWHAH
HSPB1	VIM
HSPB1	SNW1
HSPB1	LIG1
HSPB1	HSP90AB1
HSPB1	RBM39
HSPB1	TRIM24
HSPB1	SMARCA2
HSPB1	PTPN3
HSPB1	PRPF40A
HSPB1	MRPL28
HSPB1	INPP5K
HSPB1	ZBTB17
HSPB1	YWHAB
HSPB1	XRCC5
HSPB1	SQSTM1
HSPB1	HSP90AA1
HSPB1	SMARCD1
HSPB1	PPM1A
HSPB1	INS
HSPB1	UCHL5
HSPB1	LRIF1
HSPB1	NFKBIA
HSPB1	C1orf103
AGTR2	SNTA1
AGTR2	AGTRAP
AGTR2	ACE
AGTR2	GNAI3
AGTR2	GNAI2
SNTA1	TRA
SNTA1	MAST1
UBQLN4	PELI2
EFNB1	YWHAQ
EFNB1	MYC
EFNB1	PICK1
EFNB1	SORBS1
EFNB1	EPHB1
EFNB1	SRC
EPHB1	PRKCG
EPHB1	GRB7
EPHB1	PXN
EPHB1	EPHB6
EPHB1	GRB10
EPHB1	NCK1
EPHB1	GRB2
POLR2A	CALCOCO1
POLR2A	PRMT5
POLR2A	KAT2B
POLR2A	SMURF1
POLR2A	PPP1CA
POLR2A	CDC14A
POLR2A	CTDSP2
POLR2A	TBP
POLR2A	XRCC5
POLR2A	CTDP1
POLR2A	HTATSF1
DRD2	GNB5
DRD2	CLIC6
DRD2	PPP1R9B
DRD2	KCNJ9
DRD2	GNAI3
DRD2	GNAI2
DRD2	GNAZ
DRD2	EPB41
DRD2	CADPS2
GNB5	GNG2
TAF4	TBP
SGTA	FXYD7
SGTA	GAL
SGTA	TFF3
SGTA	GABARAPL2
SGTA	PIAS1
SGTA	BAG6
SGTA	F11R
SGTA	SPP1
CDC34	PARK2
CDC34	43525
CDC34	TRIM21
CDC34	TBL1X
CDC34	RELA
CDC34	UBC
CDC34	NFKBIA
CDC34	CREM
IKBKG	IFIT5
IKBKG	SNW1
IKBKG	GADD45G
IKBKG	RNF11
IKBKG	TBK1
IKBKG	CDC37
IKBKG	TRAF3IP2
IKBKG	TANK
CRK	ELK3
CRK	RIN3
CRK	CLNK
CRK	TDG
CRK	BATF3
CRK	PRKACA
CRK	ERBB2
CRK	POT1
CRK	PPP1CA
CRK	PTPN1
CRK	PXN
CRK	MAPK8
CRK	INSR
CRK	IGF1R
CRK	EGFR
CRK	FRS2
CRK	SHC1
CRK	NCK1
CRK	FGFR1
CRK	EPHB6
CRK	ATXN1
CRK	GRB2
ZHX1	PRPF40A
NGFR	TK1
NGFR	KIDINS220
NGFR	MAGEH1
NGFR	TRAF2
NGFR	SHC1
NGFR	NTRK2
NGFR	NGFRAP1
NGFR	NTRK3
NGFR	MAPK3
NGFR	MAPK1
NGFR	SORT1
CHD3	SKIL
CHD3	UBC
CHD3	LRIF1
CHD3	NR1H2
CHD3	CTBP1
CHD3	RGS2
CHD3	AIMP2
CHD3	GSK3B
CHD3	PCMT1
CHD3	CPE
CHD3	CREB1
CHD3	C1orf103
CHD3	PRPF40A
CHD3	ZHX1
CHD3	UBE2I
CHD3	GIT1
CHD3	VIM
CDC20	TP63
CDC20	PPP2CA
CDC20	UBC
CDC20	TRIP13
CDC20	TK1
CDC20	CCNA1
CDC20	HDAC1
CDC20	CDC27
CDC20	SOSTDC1
CDC20	MAD2L1
MBP	MAPK8
MBP	PRKCB
MBP	SQSTM1
MBP	HIPK2
MBP	PRKDC
MBP	STK3
MBP	IKBKE
MBP	TBK1
MBP	SRPK1
MBP	PRMT5
MBP	PRKACA
MBP	PRKCD
MBP	PRKCA
MBP	MAPK1
MBP	PAK1
MBP	MAPK3
MBP	ATXN1
MBP	APTX
PTPRC	SRC
PTPRC	RNF11
PTPRC	ANP32A
PTPRC	SKAP1
JAK2	PPP1CC
JAK2	IKBKG
JAK2	PRMT5
JAK2	SHC1
JAK2	STAT1
JAK2	PTPN12
JAK2	PTPN1
JAK2	PTPN6
JAK2	PTPN11
JAK2	PTPRC
JAK2	PPP2CA
JAK2	NFKBIA
JAK2	PKD1
DPP4	PTPRC
DPP4	GRP
HLA-DRB1	ZDHHC17
HLA-DRB1	43525
HLA-DRB1	MAGEA3
HLA-DRB1	TRIM21
HLA-DRB1	TRB
HLA-DRB1	TRA
TRB	TAF1B
TRA	TRB
YWHAH	NCOA1
YWHAH	NCOA3
DUSP14	UCHL5
CD8A	CDK1
CD8A	PTPRC
CD8A	HLA-B
CD8A	SFRS1
FGFR1	PTPN1
FGFR1	HTR1A
FGFR1	RPS6KA3
FGFR1	NCK1
FGFR1	NEDD4
FGFR1	FRS2
FGFR1	SHC1
FGFR1	PLCG1
FGFR1	TENC1
FGFR1	NCAM1
FGFR1	GRB2
DISC1	KIAA1377
DISC1	CEP63
DISC1	ATF7IP
EGFR	GNAI3
EGFR	RGS2
EGFR	STYX
EGFR	DUSP19
EGFR	ILKAP
EGFR	PPM1B
EGFR	PPM1A
EGFR	PPP3CB
EGFR	PTPN7
EGFR	PTPRR
EGFR	LRP1
EGFR	WASL
EGFR	MAPK9
EGFR	NTRK2
EGFR	ITGB2
EGFR	MAPK8
EGFR	SH3GL3
EGFR	MAPT
EGFR	PRKCE
EGFR	TRAF2
EGFR	YWHAB
EGFR	YWHAQ
EGFR	IKBKG
EGFR	HSP90AB1
EGFR	HSP90AA1
EGFR	DOK5
EGFR	CLNK
EGFR	ANKS1B
EGFR	SHC2
EGFR	PRKCB
EGFR	SMURF2
EGFR	NEDD4
EGFR	PCNA
EGFR	MAST1
EGFR	HSPA1A
EGFR	PPP5C
EGFR	HSPA8
EGFR	PTPN12
EGFR	GABARAPL2
EGFR	UCHL1
EGFR	NCAM1
EGFR	PRKACA
EGFR	GRB10
EGFR	GRB7
EGFR	YWHAZ
EGFR	SHC1
EGFR	STAT1
EGFR	NCK1
EGFR	SRC
EGFR	PRKCD
EGFR	PRKCA
EGFR	PTPN1
EGFR	PTPN6
EGFR	PTPN11
EGFR	PLCG1
EGFR	ERBB2
EGFR	XRCC6
EGFR	KRT8
EGFR	JAK2
EGFR	GNAI2
EGFR	ESR1
EGFR	EPB41
EGFR	MAPK1
EGFR	PAK1
EGFR	GRB2
DRD4	KLHL12
DRD4	CLIC6
DRD4	KCNJ9
DRD4	NCK1
DRD4	GABRA1
DRD4	GRB2
ADRB2	RGS20
ADRB2	RGS2
ADRB2	GNB2L1
ADRB2	CCKBR
ADRB2	ADRBK1
ADRB2	GNAI2
ADRB2	GNG2
ADRB2	GNB1
ADRB2	GNAS
ADRB2	UCHL1
ADRB2	NEDD4
ADRB2	GPRASP1
ADRB2	EIF2B1
ADRB2	AKAP5
ADRB2	KCNJ9
ADRB2	GRK5
ADRB2	SRC
ADRB2	PRKCD
ADRB2	INSR
ADRB2	GNA15
ADRB2	GNA11
ADRB2	GRB2
NR0B1	PGR
NR0B1	SNW1
NR0B1	ESR1
YY1	DNMT3L
YY1	SMURF2
YY1	KAT2B
YY1	ZRANB2
CDK2	SCN5A
CDK2	ESR1
CDK2	MAPT
CDK2	CKS2
CDK2	SMAD2
CDK2	PGR
CDK2	KAT2B
CDK2	PIN1
CDK2	IKBKG
CDK2	PPP2CA
CDK2	XRCC6
CDK2	EP300
CDK2	SMAD3
CDK2	CDC37
CDK2	CCNA1
CDK2	PPM1B
CDK2	ID2
CDK2	RB1
CDK2	PCNA
CDK2	CKS1B
CDK2	CDKN1A
CDK1	CEP63
CDK1	UBE3A
CDK1	PTPN6
CDK1	STK3
CDK1	EGFR
CDK1	CDC20
CDK1	EP300
CDK1	CKS1B
CDK1	SQSTM1
[truncated: 2,262 more rows]

## Sheet: PTSD-PPIs
Protein 1	Protein 2
ACTG1	LGALS13
ACTG1	DSTN
ACTG1	ABLIM1
ACTG1	PFN2
ACTG1	CFL1
ACTG1	CFL2
ACTG1	EIF6
ACTG1	SH3GL2
ACTG1	NCF1
ACTG1	WASF1
ACTG1	SUMO4
ACTG1	NDRG1
ACTG1	CAP1
ACTG1	DNASE1
ACTG1	GSN
ACTG1	TMSB4X
ACTG1	BCAP31
ACTG1	MAP1A
ACTG1	NR3C2
ACTG1	DYNLL1
ACTG1	PLD1
ACTG1	ATF7IP
ACTG1	CAP2
ACTG1	TNIK
ACTG1	MAPK6
ACTG1	MYOC
ACTG1	APOE
ACTG1	BRCA1
ACTG1	LIG4
ACTG1	GZMA
ACTG1	MLH1
ACTG1	CTBP2
ACTG1	COTL1
ACTG1	WASL
ACTG1	CDKN2A
ACTG1	EHHADH
ACTG1	WDYHV1
ACTG1	HSPB2
ACTG1	SRPK2
ERBB2	PAK1
ERBB2	ERBB2IP
ERBB2	NF2
ERBB2	PICK1
ERBB2	GRB2
ERBB2	ITGA5
ERBB2	ESR1
ERBB2	STUB1
ERBB2	UBB
ERBB2	PTPN11
ERBB2	ERBB4
ERBB2	HSP90AA1
ERBB2	HLA-A
ERBB2	ITGB4
ERBB2	JAK2
ERBB2	MUC1
ERBB2	PIK3R1
ERBB2	PLCG1
ERBB2	JUP
ERBB2	SOS1
ERBB2	SRC
ERBB2	ERBB3
ERBB2	HSP90B1
ERBB2	SHC1
ERBB2	IL6ST
ERBB2	PTK2
ERBB2	HDAC6
ERBB2	SH2B2
ERBB2	NCK2
ERBB2	JAK1
ERBB2	STAT3
ERBB2	STAT1
ERBB2	SYK
ERBB2	SHC2
ERBB2	MAPK8IP2
ERBB2	TENC1
ERBB2	DOK4
ERBB2	SHC3
ERBB2	PIK3R3
ERBB2	VAV3
ERBB2	SRPK1
ERBB2	USP2
ERBB2	GLCE
ERBB2	KLK5
ERBB2	PSMC3IP
ERBB2	RHOBTB2
ERBB2	GMPR2
ERBB2	HDLBP
ERBB2	PSAP
ERBB2	EZR
ERBB2	PTPN6
ERBB2	PPM1A
ERBB2	DUSP19
ERBB2	LATS2
ERBB2	STK11
ERBB2	GLIS2
ERBB2	BECN1
ERBB2	AURKA
ERBB2	GRM1
ERBB2	HGF
ERBB2	MYC
ERBB2	PDGFRA
ERBB2	RAF1
ERBB2	RASSF1
ERBB2	TP53
ERBB2	FBXO7
PAK1	PLCG1
PAK1	RAC1
PAK1	PXN
PAK1	CDK5R1
PAK1	NCK2
PAK1	PDPK1
PAK1	ARPC1B
PAK1	MAPK1
PAK1	SMURF1
PAK1	TGFBR1
PAK1	RHOU
PAK1	SYN1
PAK1	PRKCD
PAK1	NCF1
PAK1	FRS2
PAK1	YWHAG
PAK1	TGFBR2
PAK1	CRIPAK
PAK1	DYNLL1
PAK1	SORBS2
PAK1	SHC1
PAK1	RAF1
PAK1	YWHAZ
PAK1	TGM2
PAK1	CHORDC1
PAK1	HIST1H3A
PAK1	BRSK1
PAK1	PPM1A
PAK1	PPP2CA
PAK1	PPP1CA
DLG4	ERBB2
DLG4	LYN
DLG4	PRKCA
DLG4	LRP1
DLG4	CASK
DLG4	LRP2
DLG4	MAP1A
DLG4	ERBB4
DLG4	DYNLL1
DLG4	AKAP5
DLG4	KIF1B
DLG4	ERBB2IP
DLG4	DLGAP2
DLG4	-
DLG4	GRIN1
DLG4	TANC1
DLG4	HTT
DLG4	KCNA3
DLG4	GRIN2B
DLG4	GRIN2A
DLG4	LRP8
DLG4	SRC
DLG4	FYN
DLG4	NOS1
DLG4	KHDRBS1
DLG4	MDM2
DLG4	TRAF6
ARHGAP5	SMURF2
ARHGAP5	ITGA5
ARHGAP5	ITGB1
NF2	SDCBP
NF2	PXN
NF2	PAK1
NF2	SLC9A3R1
NF2	TARBP2
NF2	EZR
NF2	KDM1A
NF2	AMOT
NF2	PRKCA
NF2	GLTSCR2
NF2	BECN1
NF2	GLIS2
NF2	AURKA
NF2	LATS2
NF2	STK11
NF2	TERT
NF2	PDGFRA
NF2	RAF1
NF2	RASSF1
NF2	TP53
PICK1	GRIP1
PICK1	F11R
PICK1	UBQLN4
PICK1	ERBB2IP
FOXG1	HDAC1
FOXG1	SMAD3
FOXG1	SMAD4
FOXG1	SMAD2
FOXG1	FOXO1
FOXG1	FOXO3
FOXG1	FOXO4
FOXG1	HES1
HDAC1	PHB
HDAC1	PCNA
HDAC1	NR2F2
HDAC1	RB1
HDAC1	RBL2
HDAC1	PTMA
HDAC1	SP1
HDAC1	SUV39H1
HDAC1	PPARD
HDAC1	SMAD2
HDAC1	ING1
HDAC1	SP3
HDAC1	HR
HDAC1	NRIP1
HDAC1	RBBP7
HDAC1	RBBP4
HDAC1	MTA1
HDAC1	RAD9A
HDAC1	HDAC2
HDAC1	BRMS1
HDAC1	HDAC9
HDAC1	SETDB1
HDAC1	HDAC3
HDAC1	UBE2I
HDAC1	PIAS3
HDAC1	EED
HDAC1	DNMT3L
HDAC1	KDM1A
HDAC1	BAZ2A
HDAC1	DDX17
HDAC1	ZBTB16
HDAC1	HBP1
HDAC1	-
HDAC1	PHF12
HDAC1	TRIM27
HDAC1	PML
HDAC1	RFC1
HDAC1	RUVBL2
HDAC1	STAT3
HDAC1	NFKBIA
HDAC1	RBL1
HDAC1	KAT5
HDAC1	MAGEA1
HDAC1	NCOR2
HDAC1	PIAS4
HDAC1	PHB2
HDAC1	TOP2A
HDAC1	TP53
HDAC1	NR2E3
HDAC1	HIF1A
HDAC1	PPP2R1B
HDAC1	MAD1L1
HDAC1	MYOD1
HDAC1	NFKB1
HDAC1	RELA
HDAC1	MDM2
HDAC1	KMT2A
HDAC1	YY1
HDAC1	TAB2
HDAC1	VHL
HDAC1	MECP2
HDAC1	WHSC1
HDAC1	MBTPS1
HDAC1	HELLS
HDAC1	SERPINB5
HDAC1	MEN1
HDAC1	SYK
HDAC1	LCOR
HDAC1	NR0B2
HDAC1	HNRNPD
HDAC1	KLF4
HDAC1	PRKACA
HDAC1	SMAD3
HDAC1	TP73
HDAC1	NR1D2
HDAC1	MYC
HDAC1	BHLHE41
HDAC1	DMAP1
HDAC1	PPARG
HDAC1	H2AFY
HDAC1	UHRF2
HDAC1	HIST3H3
HDAC1	PRKG1
HDAC1	RARA
HDAC1	HIST1H3A
CD4	PIK3R1
CD4	SELL
CD4	IL2RA
CD4	CD53
CD4	CD5
CD4	LCK
CD4	CXCR4
CD4	MAPK14
CD4	SIVA1
CBL	LYN
CBL	PLCG1
CBL	PTPN6
CBL	SRC
CBL	NOTCH1
CBL	SYK
CBL	NCK1
CBL	SHC1
CBL	CRKL
CBL	KHDRBS1
CBL	UBE2D2
CBL	UBE2G2
CBL	UBE2L3
CBL	FRS2
CBL	EIF5B
CBL	GRB2
CBL	PDGFRB
CBL	YWHAB
CBL	YWHAZ
CBL	PRKCA
CBL	PTPN11
CBL	KDR
CBL	EPOR
CBL	KIT
CBL	STAT5A
CBL	TRAF6
CBL	STAT5B
CBL	SH2B2
CBL	OSTF1
CBL	YWHAG
CBL	SORBS2
CBL	PIK3R1
CBL	PDGFRA
CBL	IGF1R
CBL	EGFR
CBL	FYN
CBL	HCK
CBL	YWHAQ
CBL	INSR
CBL	KRT18
CBL	CD5
CBL	LCK
CBL	CRK
CBL	MET
CBL	UBE2D1
CBL	UBC
CBL	CDC42
CBL	STAP2
CBL	MYH9
CBL	MAPK8
CBL	CUBN
CBL	UBE2D3
CBL	TNS4
CBL	CTNNB1
CBL	TRAF4
CBL	ERBB2
CBL	TGFBR2
CBL	UBE2M
CBL	PIK3R3
CBL	STAT3
CBL	TGM2
CBL	JAK2
PLCG1	GNB2L1
PLCG1	SOS1
PLCG1	SRC
PLCG1	SYN1
PLCG1	SYK
PLCG1	PTK2
PLCG1	DGKZ
PLCG1	PLD2
PLCG1	KHDRBS1
PLCG1	BAG3
PLCG1	PRKD1
PLCG1	VAV3
PLCG1	-
PLCG1	TRPC3
PLCG1	PTPN11
PLCG1	SHC1
PLCG1	RHOU
PLCG1	SYNCRIP
MAPK1	PTPN1
MAPK1	RB1
MAPK1	RXRA
MAPK1	SREBF1
MAPK1	SP1
MAPK1	ZFP36
MAPK1	TP53
MAPK1	RPS6KA3
MAPK1	SREBF2
MAPK1	SHC1
MAPK1	UBTF
MAPK1	STAT5A
MAPK1	RPS6KA1
MAPK1	NCOA3
MAPK1	KHDRBS1
MAPK1	PXN
MAPK1	NCOA1
MAPK1	IER3
MAPK1	SNCG
MAPK1	PPP1R9B
MAPK1	PEA15
MAPK1	STAT5B
MAPK1	RGS19
MAPK1	HDAC4
MAPK1	FRS3
MAPK1	TPR
MAPK1	TSC2
MAPK1	TNFRSF1A
MAPK1	STAT3
MAPK1	SOS1
MAPK1	MAPK8
MAPK1	RPS6KB1
MAPK1	PLCB1
MAPK1	FRS2
MAPK1	SNCA
MAPK1	RAF1
MAPK1	ADAM17
MAPK1	TOP2A
MAPK1	NUP153
MAPK1	RARA
MAPK1	MAPKAPK2
MAPK1	CACYBP
MAPK1	NOXA1
MAPK1	CUEDC2
MAPK1	EGLN3
MAPK1	HDAC6
MAPK1	BANP
MAPK1	COPS6
MAPK1	UBE3A
HRAS	PIK3R1
HRAS	PIK3CA
HRAS	SOS1
HRAS	SRC
HRAS	IRAK1
HRAS	TIAM1
HRAS	MAPK8
HRAS	DGKZ
HRAS	RABAC1
HRAS	BRAP
HRAS	RASSF1
HRAS	RASSF5
HRAS	PRKCZ
HRAS	PRKCI
HRAS	RHOD
HRAS	TP73
HRAS	INSR
HRAS	RAF1
HRAS	RASGRF1
HRAS	ARHGEF1
HRAS	BTRC
HRAS	KRT18
BTK	LYN
BTK	CBL
BTK	PRKCZ
BTK	PRKCA
BTK	SYK
BTK	GNAQ
BTK	CAV1
BTK	STAT5A
BTK	GTF2I
BTK	KHDRBS1
BTK	GNA12
BTK	PRKD1
BTK	WASF2
BTK	SH2B2
BTK	GNG2
BTK	RELA
BTK	KIT
BTK	PLCG1
BTK	IRAK1
BTK	TLR8
BTK	MYD88
BTK	TP53
BTK	EWSR1
BTK	HCK
BTK	JAK1
BTK	RPS6KB1
BTK	RPS6KB2
BTK	FYN
BTK	GRB2
BTK	BCL2L11
BTK	PIK3R3
BTK	BECN1
BTK	SMURF1
BTK	AURKA
BTK	MEOX2
BTK	MDM2
TGFBR1	TGFBR2
TGFBR1	SMURF2
TGFBR1	-
TGFBR1	SNX6
TGFBR1	ASH2L
TGFBR1	BTBD2
TGFBR1	ENC1
TGFBR1	FBXL12
TGFBR1	DCAF6
TGFBR1	NEK6
TGFBR1	OCLN
TGFBR1	RHOD
TGFBR1	STUB1
TGFBR1	UBB
TGFBR1	UBE2E3
TGFBR1	RPAP3
TGFBR1	UBXN1
TGFBR1	UBE2Z
TGFBR1	RGS19
TGFBR1	SQSTM1
TGFBR1	TRAF6
TGFBR1	RANBP9
TGFBR1	OTUB1
SYK	TUBA4A
SYK	TRAF6
SYK	SH2B2
SYK	UBB
SYK	TNFRSF1A
SYK	HDAC3
SYK	HDAC4
SYK	HDAC6
SYK	HDAC9
SYK	USP25
SYK	TERF1
SYK	TRIM15
SYK	RHOU
IL6ST	PTPN11
IL6ST	PTPN6
IL6ST	PRKCD
IL6ST	OSMR
IL6ST	STAT3
IL6ST	JAK1
IL6ST	SHC1
IL6ST	UBQLN1
HNRNPK	LYN
HNRNPK	PRKCD
HNRNPK	SRC
HNRNPK	GFI1B
HNRNPK	KHDRBS1
HNRNPK	PRMT1
HNRNPK	NCK2
HNRNPK	SFRS3
HNRNPK	SAFB
HNRNPK	YBX1
HNRNPK	TBP
HNRNPK	UBE2I
HNRNPK	MDM2
HNRNPK	TP53
HNRNPK	SUMO1
HNRNPK	PPP1R10
HNRNPK	CCAR1
HNRNPK	SF1
HNRNPK	DDX17
HNRNPK	SYNCRIP
HNRNPK	PABPC1
HNRNPK	RBFOX2
HNRNPK	BTRC
HNRNPK	SMAD3
HNRNPK	YWHAQ
HNRNPK	TCERG1
HNRNPK	PRPF40A
HNRNPK	NEDD4
HNRNPK	PIN1
HNRNPK	WWOX
HNRNPK	RASD1
HNRNPK	DALRD3
HNRNPK	HIST3H3
HNRNPK	SRPK2
HNRNPK	AURKA
HNRNPK	FBXO7
HNRNPK	RBM14
EZH2	HDAC1
EZH2	EED
EZH2	POLA2
EZH2	GTF3C1
EZH2	HIST1H3A
EZH2	HIST1H1A
EZH2	RBL2
EZH2	PHB2
EZH2	USP7
EZH2	RBBP4
EZH2	HIST3H3
EZH2	MAPK8IP2
EZH2	GADD45G
EZH2	TK1
EZH2	SMN1
EZH2	PFDN1
EZH2	PJA1
EZH2	RELA
EZH2	SMYD3
EZH2	MED1
EZH2	KDM1A
EZH2	SUV39H1
EZH2	JAK2
EZH2	43800
EZH2	KAT2B
EZH2	SIRT1
EZH2	LATS2
EZH2	TRIM28
TGFBR2	EIF3I
TGFBR2	SNX6
TGFBR2	TRAF6
ZYX	VAV3
ZYX	NEBL
ZYX	WNK1
ZYX	PDLIM5
ZYX	SIRT1
SIAH2	TRAF2
SIAH2	CACYBP
SIAH2	PIAS1
SIAH2	PIAS2
SIAH2	UBE2I
SIAH2	PIAS3
SIAH2	SNCA
SIAH2	HIPK2
SIAH2	TINF2
SIAH2	USP19
SIAH2	EGLN3
SIAH2	DYRK2
SIAH2	UBE2D2
SIAH2	UBE2D1
SIAH2	PPP1R13B
SIAH2	TP53BP2
SIAH2	UBE2D3
SIAH2	STAT3
SIAH2	CHEK2
SIAH2	ZYX
SIAH2	UBE2N
RPL10	SRC
ERBB4	ADAM17
ERBB4	STAT5A
ERBB4	RNF41
ERBB4	SHC1
ERBB4	GRB2
ERBB4	STAT5B
ERBB4	MUC1
ERBB4	HDAC6
ERBB4	NEDD4
ERBB4	TAB2
ERBB4	SYK
ERBB4	WWOX
ERBB4	PTPN6
ERBB4	PTPN11
ERBB4	PTPN12
ERBB4	PPM1A
ERBB4	DUSP19
ERBB4	FYN
ERBB4	NTRK2
TYRO3	IKBKG
TYRO3	KRT40
TYRO3	KRTAP10-8
TP53BP2	YWHAG
TP53BP2	MAPK8IP2
TP53BP2	PPHLN1
TP53BP2	YWHAQ
TP53BP2	TCL1A
TP53BP2	HIST1H2BC
TP53BP2	LMO4
TP53BP2	TRAF4
TP53BP2	NDC80
TP53BP2	SSX2IP
TP53BP2	CWF19L2
TP53BP2	TXLNA
TP53BP2	UBE3A
TIAM1	PPP1R9B
TIAM1	YWHAG
TIAM1	MAPK8IP2
TIAM1	UBC
TIAM1	BTRC
TIAM1	SETDB1
REL	SP1
REL	TBP
REL	RELA
REL	CLIC4
REL	MVP
REL	TDO2
REL	ATXN1
REL	SDCBP
REL	NCK2
REL	RBM39
REL	EPM2AIP1
REL	GADD45G
REL	EXOSC8
REL	TENC1
REL	OSTF1
REL	EXOSC1
REL	EXOSC5
REL	NGB
REL	UBE2Z
REL	FLAD1
REL	RASSF5
REL	BMF
REL	EGLN3
REL	CPNE2
REL	TRIM74
REL	TRIM27
REL	S100A1
REL	YARS
REL	BANP
SP1	SREBF1
SP1	YY1
SP1	SREBF2
SP1	SP3
SP1	KLF4
SP1	PER3
SP1	ZBTB16
SP1	SKIV2L2
SP1	ATF7IP
SP1	VHL
SP1	NCOR1
SP1	NCOR2
SP1	TP53
SP1	TBP
SP1	NR2F1
SP1	LDB1
SP1	CBX5
SP1	CCNA1
SP1	BTRC
SP1	CTCFL
SP1	TP73
SP1	VEGFA
TBP	TP53
TBP	UBTF
TBP	NCOA3
TBP	NCOA1
TBP	TRIP4
TBP	TAF1A
TBP	TAF1B
TBP	EDF1
TBP	PIAS1
TBP	PIAS3
TBP	YWHAE
TBP	NCOA6
TBP	GTF3C4
TBP	RUVBL2
TBP	UBE2I
TBP	SSX2IP
TBP	HIST3H3
TBP	CTCFL
TBP	HUWE1
MAPK8	REL
MAPK8	TP53
MAPK8	PXN
MAPK8	SNCG
MAPK8	BCL2L11
MAPK8	MAPK8IP2
MAPK8	STAT3
MAPK8	BMF
MAPK8	WWOX
MAPK8	YWHAZ
MAPK8	RASSF1
MAPK8	SHC1
MAPK8	TP73
MAPK8	TRAF6
MAPK8	RPS6KB1
MAPK8	SIRT1
MAPK8	HDAC9
MAPK8	PIAS2
MAPK8	PNRC1
MAPK8	NCOA3
MAPK8	MAPKAP1
MAPK8	PKMYT1
MAPK8	RAF1
MAPK8	SP1
SNRNP70	SMURF2
SNRNP70	PRPF40A
SNRNP70	NUDT21
SNRNP70	DDX17
SNRNP70	SRPK1
SNRNP70	SRPK2
SNRNP70	TOP1
ETS2	SMARCA4
ETS2	SRC
ETS2	NCOR1
ETS2	NR3C1
ETS2	JUN
ETS2	STAT5B
ETS2	FOS
ETS2	SRA1
HSPA8	REL
HSPA8	RB1
HSPA8	RAF1
HSPA8	SP1
HSPA8	CITED1
HSPA8	DYNLL1
HSPA8	BAG3
HSPA8	STUB1
HSPA8	DNAJA3
HSPA8	TCERG1
HSPA8	PPID
HSPA8	RGS2
HSPA8	UBC
HSPA8	HDAC3
HSPA8	CXCR4
HSPA8	YWHAG
HSPA8	MAPT
HSPA8	SUMO4
HSPA8	CYCS
HSPA8	TADA3
HSPA8	UCHL1
HSPA8	HSP90AA1
HSPA8	YWHAQ
HSPA8	JAK2
HSPA8	STMN1
HSPA8	DNAJB1
HSPA8	TP53
HSPA8	BAG4
HSPA8	TNFRSF1A
HSPA8	PARK2
HSPA8	MAPK8
HSPA8	SNCA
HSPA8	ST13
HSPA8	STIP1
HSPA8	DNAJC7
HSPA8	SGTA
HSPA8	TGM2
HSPA8	JUN
HSPA8	VHL
HSPA8	AIPL1
HSPA8	NMI
HSPA8	PTEN
HSPA8	HIST1H3A
MYOD1	NR2F2
MYOD1	STAT3
MYOD1	PHB2
MYOD1	SUV39H1
MYOD1	PRKCA
MYOD1	RB1
MYOD1	RXRA
MYOD1	SP1
MYOD1	RORA
MYOD1	NCOR2
MYOD1	PSMD4
MYOD1	HAND1
MYOD1	HEY1
MYOD1	KAT2B
MYOD1	BHLHE41
MYOD1	NCOR1
MYOD1	KAT5
MYOD1	SETD7
MYOD1	POLR2G
MYOD1	HUWE1
GTF2B	REL
GTF2B	JUN
GTF2B	GTF2E2
GTF2B	TBP
GTF2B	NCOA3
GTF2B	NCOA4
GTF2B	NOLC1
GTF2B	NCOA1
GTF2B	POLR2A
GTF2B	TAF9
GTF2B	TCEA2
GTF2B	THRA
GTF2B	PSMC5
GTF2B	YWHAE
GTF2B	NR2F1
GTF2B	HSF1
GTF2B	RELA
GTF2B	MECP2
GTF2B	NCOR1
GTF2B	NR1D2
GTF2B	SRA1
GTF2B	HNF4A
GTF2B	FBXO25
GTF2B	JAK3
CALM1	REL
CALM1	RRAD
CALM1	DDX5
CALM1	SYT1
CALM1	KRAS
CALM1	TNNI2
CALM1	GJB1
CALM1	RGS2
CALM1	HMMR
CALM1	NRGN
CALM1	EGFR
CALM1	ESR1
CALM1	EWSR1
CALM1	GRK4
CALM1	HSP90AA1
CALM1	INSR
CALM1	MAPT
CALM1	MYOD1
CALM1	SNCA
CALM1	GRK1
CALM1	OPRM1
CALM1	CNN1
CALM1	MYLK
CALM1	SNTA1
CALM1	ESR2
CALM1	CAMK2G
CALM1	KCNQ2
CALM1	GRM5
CALM1	AKAP5
CALM1	CAMK1
CALM1	YWHAE
CALM1	EDF1
CALM1	RGS10
CALM1	TRPV6
CALM1	CSNK2A1
CALM1	CSNK2A2
CALM1	OBSCN
CALM1	STRN3
CALM1	CAMKK1
CALM1	GRIN1
CALM1	TRPC3
CALM1	STRN
CALM1	CRHR1
CALM1	GLP1R
CALM1	SCTR
CALM1	VIPR1
CALM1	NR3C1
CALM1	ITPKA
CALM1	ITPKB
CALM1	LTF
CALM1	RELA
CALM1	CCNA2
CALM1	GRK5
CALM1	AKAP9
CALM1	H2AFX
CALM1	SYK
CALM1	CASP8AP2
CALM1	CDC37L1
CALM1	GNAS
CALM1	RDX
CALM1	GTF2I
CALM1	CDC5L
CALM1	KIF1B
CALM1	PAM
CALM1	DOCK3
CALM1	HERC2
CALM1	FKBP3
CALM1	SNX6
CALM1	TPT1
CALM1	RANBP2
CALM1	LMO7
CALM1	PPIL2
CALM1	HUWE1
CALM1	YBX1
CALM1	S100B
CALM1	SET
CALM1	RPL22
CALM1	PRDX1
CALM1	PHACTR4
CALM1	ZBTB24
CALM1	RPL13A
CALM1	SQSTM1
CALM1	THOP1
CALM1	HSPA4
CALM1	FKBP4
CALM1	FKBP8
CALM1	CSNK2B
CALM1	SPP1
CALM1	SEC61A1
CALM1	TSC2
CALM1	DRD2
CALM1	DAPK1
CALM1	NOS3
CALM1	NOS2
CALM1	RYR2
CALM1	YWHAQ
CALM1	PTEN
CALM1	UBE3A
CALM1	MYC
CALM1	ERBB2
KIT	LYN
KIT	PIK3R1
KIT	PLCG1
KIT	PTPN11
KIT	PTPN6
KIT	PRKCA
KIT	SRC
KIT	STAT1
KIT	MPDZ
KIT	SH2B2
KIT	STAT5A
KIT	STAT5B
KIT	LCK
LYN	PLCG1
LYN	PTPN6
LYN	PRKCD
LYN	SYK
LYN	SHC1
LYN	PTK2
LYN	PRKDC
LYN	MAPK3
LYN	KHDRBS1
LYN	BCAR1
LYN	PRAM1
LYN	GP6
LYN	SH2B2
LYN	MME
LYN	PILRB
LYN	UBB
LYN	PAK2
LYN	MUC1
LYN	SNCA
LYN	SRC
LYN	RPS6KB1
LYN	RPS6KB2
LYN	RPL10
LYN	UHRF2
LYN	TNK2
LYN	PDE4D
LYN	STAT3
LYN	TNF
LYN	TRIM28
PIK3R1	PTPN11
PIK3R1	SRC
PIK3R1	TGFBR1
PIK3R1	TUBG1
PIK3R1	SYN1
PIK3R1	TEK
PIK3R1	TYRO3
PIK3R1	SHC1
PIK3R1	PTK2
PIK3R1	MAPK8
PIK3R1	RAC1
PIK3R1	TUBA1B
PIK3R1	BCAR1
PIK3R1	YWHAG
PIK3R1	VAV3
PIK3R1	-
PIK3R1	PPM1A
PIK3R1	PTPN6
PIK3R1	RB1
PIK3R1	KHDRBS1
PIK3R1	WASF3
PIK3R1	TSHR
PIK3R1	TGFBR2
PIK3R1	SYK
PIK3R1	EZR
PIK3R1	PSEN1
PIK3R1	ADAMTS2
PIK3R1	TTR
PIK3R1	SQSTM1
PIK3R1	STAT3
PIK3R1	TNS4
PIK3R1	LRRK2
PIK3R1	YWHAZ
PIK3R1	BRD7
PTPN11	TNFRSF1A
PTPN11	TEK
PTPN11	STAT1
PTPN11	SHC1
PTPN11	STAT5A
PTPN11	PXN
PTPN11	STAT5B
PTPN11	MVP
PTPN11	FRS2
PTPN11	FRS3
PTPN11	STAT3
PTPN11	CXCR4
PTPN11	SRC
PTPN11	SOS1
PTPN11	PILRB
PTPN11	SYNCRIP
PTPN11	TRIM32
LGALS13	NUFIP2
PTPN6	SRC
PTPN6	TNFRSF1A
PTPN6	SYK
PTPN6	KHDRBS1
PTPN6	STAT5B
PTPN6	PILRB
PTPN6	TFG
PTPN6	PTPN11
PTPN6	SHC1
PTPN6	STAT6
PTPN6	TRAF6
PTPN6	SOS1
PTPN6	CXCR4
PRKCA	SPP1
PRKCA	PTPN11
PRKCA	GNB2L1
PRKCA	PRKCZ
PRKCA	RRAD
PRKCA	RHO
PRKCA	SCTR
PRKCA	SEMG1
PRKCA	SEMG2
PRKCA	TERT
PRKCA	SRC
PRKCA	TP53
PRKCA	VCL
PRKCA	VTN
PRKCA	NCF1
PRKCA	RPL10
PRKCA	XK
PRKCA	PTPN12
PRKCA	SYK
PRKCA	SNAP25
PRKCA	TIAM1
PRKCA	RGS2
PRKCA	YWHAZ
PRKCA	DGKZ
PRKCA	BTG2
PRKCA	TEP1
PRKCA	ARHGEF1
PRKCA	RAC1
PRKCA	HAND1
PRKCA	HAND2
PRKCA	CYTH2
PRKCA	RGS7
PRKCA	SNAP23
PRKCA	FSCN1
PRKCA	OCLN
PRKCA	STXBP1
PRKCA	SPAG1
PRKCA	PEA15
PRKCA	AKAP5
PRKCA	AKAP12
PRKCA	RGS19
PRKCA	YWHAG
PRKCA	CD163
PRKCA	TRPV6
PRKCA	PLCB1
PRKCA	HSPB8
PRKCA	PRKG1
PRKCA	PTGIR
PRKCA	EDF1
PRKCA	SDPR
PRKCA	KCNE4
PRKCA	ADAP1
PRKCA	AFAP1
PRKCA	TRIM29
PRKCA	PDLIM7
PRKCA	STXBP3
PRKCA	TNNI3
PRKCA	HABP4
PRKCA	TRPC3
PRKCA	PPP1R14A
PRKCA	THOC5
PRKCA	RARA
PRKCA	SDC4
PRKCA	TNNT2
PRKCA	PTPN6
PRKCA	SLC6A9
PRKCA	F11R
PRKCA	SHC1
PRKCA	DGKD
PRKCA	CORO1B
PRKCA	PICK1
PRKCA	EZR
PRKCA	TOP2A
PRKCA	NUMB
PRKCA	RALBP1
PRKCA	SLC1A1
PRKCA	SDC2
PRKCA	RAF1
PRKCA	TRIM41
PRKCA	HMGA2
PRKCA	TNP1
PRKCA	TNP2
PRKCA	HIST1H3A
PRKCA	DDX58
PRKCA	HDAC6
PRKCA	NR1H2
PRKCA	HIST3H3
PRKCA	SCRIB
PRKCA	RICTOR
PRKCA	SELL
PRKCA	FBXO25
PRKCA	PSMB4
PRKCA	SACM1L
PRKCA	TBXA2R
PRKCA	RBCK1
PRKCA	RNF31
PRKCA	NOXA1
PRKCA	CACYBP
PRKCA	SLC9A3R1
PRKCA	SLC9A3R2
PRKCA	SMURF1
PRKCA	HR
PRKCA	MAPKAP1
PRKCA	FBXO7
PRKCA	EGLN2
SRC	GNB2L1
SRC	TERT
SRC	IKBKG
SRC	VCL
SRC	SYN1
SRC	SYK
SRC	TYRO3
SRC	STAT1
SRC	TIAM1
SRC	YWHAB
SRC	STAT5A
SRC	TRAF6
SRC	KHDRBS1
SRC	BCAR1
SRC	STAT5B
SRC	YWHAE
SRC	YWHAG
SRC	STAP2
SRC	AFAP1
SRC	-
SRC	DOK4
SRC	MAPK15
SRC	YWHAH
SRC	STAT3
SRC	DGKZ
SRC	STAT6
SRC	FRS2
SRC	PELP1
SRC	WWOX
SRC	THRA
SRC	NCOA6
SRC	CDC37
SRC	HDAC3
SRC	THRB
SRC	PPARGC1B
SRC	TNK2
SRC	STUB1
SRC	EGLN1
SRC	CCNA1
SRC	WASL
SRC	TNFRSF1A
SRC	CORO7
SRC	TP53
SRC	PIK3R3
SRC	SRPK2
SRC	TRIM15
STAT1	GNB2L1
STAT1	TNFRSF1A
STAT1	TNFRSF1B
STAT1	TRADD
STAT1	NMI
STAT1	UBE2I
STAT1	ELP2
STAT1	PIAS1
STAT1	STAT3
STAT1	CXCR4
STAT1	STAT5A
STAT1	FADD
STAT1	STAT5B
STAT1	SYK
STAT1	SUMO4
STAT1	KPNA6
STAT1	STAT4
CRKL	KIT
CRKL	PIK3R1
CRKL	PDGFRA
CRKL	PTPN11
CRKL	SOS1
CRKL	GRB2
CRKL	SYK
CRKL	SHC1
CRKL	STAT5A
CRKL	TGFB1I1
CRKL	PXN
CRKL	BCAR1
CRKL	-
CRKL	KIDINS220
CRKL	LYN
CRKL	STAT5B
CRKL	ITGB1
CRKL	EPOR
CRKL	FCGR1A
CRKL	IGF1R
CRKL	INSR
CRKL	ERBB2
CRKL	ERBB3
CRKL	RPL31
CRKL	YY1
CRKL	KHDRBS1
CRKL	TENC1
CRKL	POLR1D
CRKL	EGFR
CD81	KIT
CD81	SHC1
CD81	ZBTB16
CD81	MYOC
CD81	RBBP6
CD81	VKORC1
CD81	GLP1R
CD81	CSNK2B
CD81	JAK3
CD81	HNRNPD
CD81	LMNA
MPDZ	F11R
MPDZ	TSC22D2
LCK	STAT3
LCK	MUC1
LCK	PTK2
LCK	STAT5A
LCK	EZR
LCK	PAK2
LCK	-
LCK	NFKBIA
LCK	RAF1
LCK	PIK3R1
LCK	PIK3CA
LCK	PLCG1
LCK	PTPN11
LCK	PTPN6
LCK	MAPK1
LCK	PRKCA
LCK	PRKCD
LCK	NOTCH1
LCK	SYK
LCK	STAT1
LCK	SHC1
LCK	SQSTM1
LCK	PRKACA
LCK	MAPK3
LCK	PLD2
LCK	KHDRBS1
LCK	PXN
LCK	BCAR1
LCK	UBE3A
LCK	IKBKG
LCK	UHRF2
LCK	SOS1
LCK	SMAD2
LCK	SMAD3
LCK	WASL
LCK	UBC
LCK	SMURF1
SH2B2	SH2B1
PTK2	PTPN11
PTK2	SRC
PTK2	PTPN12
PTK2	SYK
PTK2	STAT1
PTK2	SHC1
PTK2	TGFB1I1
PTK2	PXN
PTK2	BCAR1
PTK2	NCK2
PTK2	PIAS1
PTK2	VCL
PTK2	RIPK1
PTK2	CXCR4
PTK2	TNFRSF1A
PTK2	EZR
PTK2	TP53
PTK2	LPXN
PTK2	TSC2
PTK2	RAC1
PTK2	SRPK1
PTK2	DOK4
PTK2	PTPN6
PTK2	PIK3R3
PTK2	TRIM15
NOTCH1	YY1
NOTCH1	ADAM17
NOTCH1	NUMB
NOTCH1	KAT2B
NOTCH1	GFI1B
NOTCH1	REL
NOTCH1	PSEN1
NOTCH1	RELA
NOTCH1	PRKCD
NOTCH1	CEP57L1
NOTCH1	MAGED1
NOTCH1	DAZAP2
S100A4	TPM3
S100A4	TP53
S100A4	TPM2
S100A4	BAG6
S100A4	S100B
S100A4	SRPK2
S100A4	RHOU
NFATC1	PIM1
NFATC1	PRKCA
NFATC1	GNB2L1
NFATC1	HDAC5
NFATC1	KAT2B
NFATC1	UBE2I
NFATC1	PIAS1
NFATC1	YWHAQ
PIM1	SND1
PIM1	CBX3
PIM1	CBX1
PIM1	SNX6
PIM1	HIST3H3
PIM1	SKP2
PIM1	FXR2
PIM1	BANP
PIM1	PPP2CA
PIM1	FBXO7
PIM1	UBE2I
CBX3	CBX5
CBX3	MIS12
CBX3	DSN1
CBX3	WHSC1L1
CBX3	ZNF496
CBX3	NSL1
CBX3	HIPK2
CBX1	CBX3
CBX1	CBX5
CBX1	C1orf103
CBX1	LRIF1
CBX1	NSL1
ABL1	JUN
ABL1	CBL
ABL1	PTPN6
ABL1	RAD51
ABL1	RB1
ABL1	GRB2
ABL1	SRC
ABL1	TP53
ABL1	BTK
ABL1	PTPN12
ABL1	NCK1
ABL1	PRKDC
ABL1	RAN
ABL1	TP73
ABL1	CRKL
ABL1	PXN
ABL1	BCAR1
ABL1	RAD9A
ABL1	PAK2
ABL1	WASF1
ABL1	ATM
ABL1	POLR2A
ABL1	SORBS2
ABL1	CDK1
ABL1	BRCA1
ABL1	PIK3R1
ABL1	PLCG1
ABL1	WASL
ABL1	ACTA1
ABL1	CAV1
ABL1	KIT
ABL1	TRAF6
ABL1	PRKD1
ABL1	MAPT
ABL1	DDB1
ABL1	CDKN1B
ABL1	MUC1
ABL1	TERT
ABL1	YWHAZ
ABL1	YWHAE
ABL1	YWHAH
ABL1	YWHAB
ABL1	YWHAG
ABL1	SFN
ABL1	YWHAQ
ABL1	WASF2
ABL1	EP300
ABL1	CREB1
ABL1	HCK
ABL1	JAK1
ABL1	JAK2
ABL1	XRCC6
ABL1	APP
ABL1	ABL2
ABL1	CRK
ABL1	MDM2
ABL1	ATR
ABL1	SPTAN1
ABL1	RYBP
ABL1	NCOA3
ABL1	TOPBP1
ABL1	NFKBIA
ABL1	PARK2
ABL1	NEDD4
ABL1	BAG1
ABL1	HSPA8
ABL1	NEDD4L
ABL1	PSMA7
ABL1	HUWE1
ABL1	PDE4D
ABL1	PRDX1
ABL1	EGFR
ABL1	ERBB2
ABL1	ERBB3
ABL1	ERBB4
ABL1	UBC
ABL1	SRPK2
ABL1	USP7
ABL1	LATS2
ABL1	STUB1
ABL1	MBP
ABL1	HIPK2
ABL1	CDKN1A
ABL1	EMD
ABL1	DVL2
ABL1	FBXO7
ABL1	DAPK1
ABL1	LRRK1
ABL1	PDGFRB
RAB8A	PQBP1
RAB8A	BAG6
RAB8A	IKBKG
KDR	VEGFA
KDR	SHC1
KDR	VEGFC
KDR	SRC
KDR	PTPN6
KDR	PTPN11
KDR	NCK1
KDR	STAT1
KDR	PLCG1
KDR	FRS2
KDR	SHC2
KDR	AIMP2
KDR	BTRC
KDR	FBXO25
KDR	PTPN12
KDR	PPM1A
KDR	DUSP19
KDR	MAPK1
VEGFA	VTN
VEGFA	VEGFB
SHC1	SP1
SHC1	SRC
SHC1	SYK
SHC1	VAV3
SHC1	TPR
SHC1	MAPKAPK2
SHC1	TEK
SHC1	SOS1
SHC1	STAT5A
SHC1	STAT5B
SHC1	SH2B2
SHC1	OSGEP
SHC1	NUDT21
SHC1	PRKRA
SHC1	TRIM15
GNAI3	TSHR
GNAI3	RGS20
GNAI3	MTNR1A
GNAI3	RGS3
GNAI3	RGS7
GNAI3	RGS10
GNAI3	RGS5
GNAI3	RGS19
GNAI3	NGB
GNAI3	HTR1A
GNAI3	RGS2
GNAI3	GNB1
GNAI3	GNB2
GNAI3	SOX30
GNAI3	RGS17
ATR	E2F1
ATR	TP53
ATR	KDR
ATR	CHEK1
ATR	CHEK2
ATR	CLSPN
ATR	BRCA1
ATR	RHEB
ATR	NBN
ATR	XRCC5
ATR	MSH2
ATR	ARHGEF1
ATR	BRCA2
ATR	LIG4
ATR	MRE11A
ATR	PA2G4
ATR	PIK3CA
ATR	ATRIP
ATR	FANCA
ATR	RPA2
ATR	EP300
ATR	FANCD2
ATR	H2AFX
ATR	DCLRE1C
ATR	CREB1
ATR	RASSF1
ATR	CHUK
ERG	FLI1
ERG	SETDB1
ERG	JUN
ERG	ETS2
ERG	DNAJA1
ERG	FBL
ERG	HNRNPA1
ERG	HNRNPA2B1
ERG	HNRNPAB
ERG	HNRNPC
ERG	HNRNPD
ERG	HNRNPU
ERG	HSPD1
ERG	ILF3
ERG	NCL
ERG	NOLC1
ERG	NONO
ERG	NPM1
ERG	POLR2A
ERG	PRKDC
ERG	PRPF40A
ERG	SF3B2
ERG	SFPQ
ERG	SNRNP200
ERG	SYN1
ERG	TOP1
ERG	XRN2
ERG	TRIM25
ERG	HUWE1
ERG	STUB1
ERG	UHRF1
ERG	HERC2
FLI1	SMAD9
FLI1	SMAD3
FLI1	PIAS2
FLI1	UBE2I
FLI1	PIAS1
FLI1	SIAH1
FLI1	SOX30
FLI1	PRKCD
SETDB1	TRIM28
SETDB1	PIAS4
SETDB1	ATF7IP
SETDB1	TCERG1
SETDB1	CLSTN1
SETDB1	PCDHA4
SETDB1	-
SETDB1	RNF10
SETDB1	ECSIT
SETDB1	BTBD2
SETDB1	KDM1A
SETDB1	POLA2
SETDB1	LRIF1
TTF1	KAT2B
TTF1	BAZ2A
RRAS	SOS1
RRAS	RASSF5
SOS1	NCK2
SOS1	PACSIN1
SOS1	FRS2
SOS1	RANBP9
SOS1	SPTAN1
SOS1	TNIK
NCK1	RRAS
NCK1	PDGFRB
NCK1	SOS1
NCK1	NTRK2
NCK1	RAC1
NCK1	KHDRBS1
NCK1	PXN
NCK1	PAK1
NCK1	BCAR1
NCK1	EIF2S2
NCK1	MAP4K4
NCK1	TBK1
NCK1	PAK2
NCK1	WASF1
NCK1	WASL
NCK1	TNK2
NCK1	CYFIP2
NCK1	-
NCK1	TNIK
NCK1	RHOU
NCK1	PLCG1
NCK1	FRS2
NCK1	PTK2
NCK1	PFN1
NCK1	PIK3R3
NCK1	GMPPA
CD9	ITGB1
CD9	ITGA5
CD9	CD53
CD9	KIT
CD9	PRKCA
CD9	CD81
CD9	VKORC1
RASSF5	KRT40
PRKCD	PTPN6
PRKCD	PRKCZ
PRKCD	NCF1
PRKCD	STAT1
PRKCD	SHC1
PRKCD	TIAM1
PRKCD	PRKDC
PRKCD	FSCN1
PRKCD	ADAM9
PRKCD	YWHAG
PRKCD	PLCB1
PRKCD	AFAP1
PRKCD	HABP4
PRKCD	YWHAB
PRKCD	STAT3
PRKCD	GNB2L1
PRKCD	SDC4
PRKCD	MAPK3
PRKCD	MAPK1
PRKCD	RAF1
PRKCD	SRC
PRKCD	YWHAZ
PRKCD	NUMB
PRKCD	RAC1
PRKCD	SP1
PRKCD	HDAC5
PRKCD	VHL
PRKCD	TNFRSF1A
PRKCD	VCP
PRKCD	TP73
PRKCD	SQSTM1
GRIA3	LYN
GRIA3	NSF
GRIA3	SDCBP
GRIA3	PICK1
GRIA3	SQSTM1
GRIA3	GRIP1
DSTN	SSH1
CASP3	LYN
CASP3	EIF2AK2
CASP3	PRKCZ
CASP3	RAD51
CASP3	RB1
CASP3	PTMA
CASP3	SP1
CASP3	TGM2
CASP3	CDH1
CASP3	BCAP31
CASP3	SREBF2
CASP3	NFE2L2
CASP3	PRKDC
CASP3	CASP8
CASP3	NEDD4
CASP3	PXN
CASP3	CASP4
CASP3	MDM4
CASP3	HNRNPU
CASP3	BCAR1
CASP3	PARG
CASP3	EIF2S1
CASP3	PAK2
CASP3	PSME3
CASP3	ATN1
CASP3	UBE4B
CASP3	SARS2
CASP3	PLA2G4A
CASP3	PPP3CA
CASP3	RFC1
CASP3	CTNNB1
CASP3	CDKN1A
CASP3	CDC42
CASP3	HSPD1
CASP3	MLH1
CASP3	CDC27
CASP3	MET
CASP3	SPTAN1
CASP3	AIFM1
CASP3	RAC1
CASP3	MCL1
CASP3	CDK11B
CASP3	YWHAE
CASP3	KRT18
CASP3	TOP1
CASP3	MDM2
CASP3	NMT2
CASP3	FYN
CASP3	GSN
CASP3	HTT
CASP3	PSEN1
CASP3	LMNB1
CASP3	MAPT
CASP3	HMGB1
CASP3	MDC1
CASP3	COPS6
CASP3	ZBTB16
CASP3	MAPK8
CASP3	YWHAG
CASP3	STAT1
CASP3	CRYAB
CASP3	PTGES3
CASP3	BECN1
PRKDC	RPA2
PRKDC	TP53
PRKDC	MAPK8
PRKDC	EIF2S2
PRKDC	NCOA6
PRKDC	YWHAG
PRKDC	XRCC5
PRKDC	SP1
PRKDC	DCLRE1C
PRKDC	USF1
PRKDC	RBBP8
PRKDC	NCF1
PRKDC	NR1H4
PRKDC	THRB
PRKDC	THRA
PRKDC	HDAC3
PRKDC	ATRIP
PRKDC	MDC1
PRKDC	CHEK2
PRKDC	YWHAQ
PRKDC	UBE2I
PRKDC	RASSF1
PRKDC	TOP1
MAPK3	SREBF1
MAPK3	SP1
MAPK3	TP53
MAPK3	RPS6KA3
MAPK3	SREBF2
MAPK3	UBTF
MAPK3	RPS6KA1
MAPK3	IER3
MAPK3	SNCG
MAPK3	PEA15
MAPK3	HDAC4
MAPK3	PLCB1
MAPK3	HSPB8
MAPK3	STAT3
MAPK3	STAT5A
MAPK3	MAP3K14
MAPK3	RAF1
MAPK3	MAPK8
MAPK3	PTPN11
MAPK3	RAB4A
MAPK3	SYN1
MAPK3	SYK
MAPK3	PXN
MAPK3	RPS6KB1
MAPK3	TSC2
MAPK3	RXRA
MAPK3	NUP153
MAPK3	RPS6KA6
MAPK3	MAPKAPK2
MAPK3	SCRIB
MAPK3	CUEDC2
MAPK3	HDAC6
MAPK3	AMOT
MAPK3	MAGED1
MAPK3	FRS2
MAPK3	SOS1
KHDRBS1	NCF1
KHDRBS1	OSTF1
KHDRBS1	PPP1R13B
KHDRBS1	BAIAP2L1
KHDRBS1	MPP6
KHDRBS1	PACSIN1
KHDRBS1	RBFOX2
KHDRBS1	POT1
BCAR1	-
BCAR1	UHRF2
BCAR1	GLIS2
PRAM1	RNF32
PRAM1	KRT40
FCGR2B	LYN
FCGR2B	PTPN6
FCGR2B	MAPK1
FCGR2B	MAPK3
FCGR2B	PTPN11
FCGR2B	GRB2
GRB2	HTT
GRB2	IL2RB
GRB2	ITGB4
GRB2	JAK1
GRB2	JAK2
GRB2	MAP2
GRB2	MUC1
GRB2	NGFR
GRB2	HNRNPC
GRB2	MET
GRB2	KIT
GRB2	PIK3R1
GRB2	PLCG1
GRB2	PDGFRB
GRB2	PRNP
GRB2	PTPN11
GRB2	PTPN6
GRB2	PTPN1
GRB2	MAPK1
GRB2	SOS1
GRB2	HRAS
GRB2	SRC
GRB2	TNFRSF1A
GRB2	KDR
GRB2	SYN1
GRB2	PTPN12
GRB2	SYK
GRB2	TEK
GRB2	SHC1
GRB2	PTK2
GRB2	SNTA1
GRB2	KHDRBS1
GRB2	BCAR1
GRB2	TP63
GRB2	MTA1
GRB2	WASF1
GRB2	WASL
GRB2	VAV3
GRB2	WASF2
GRB2	TNK2
GRB2	FRS2
GRB2	FRS3
GRB2	SELL
GRB2	SH2B1
GRB2	SHKBP1
GRB2	RHOU
GRB2	PAK1
GRB2	NPM1
GRB2	SHC3
GRB2	RPS6KA1
GRB2	SH2B2
GRB2	SHC2
GRB2	PNRC1
GRB2	PAK2
GRB2	PXN
GRB2	SYNCRIP
GRB2	IL6ST
GRB2	MAP3K1
GRB2	HNRNPK
GRB2	HSPA5
GRB2	KRT8
GRB2	MAP1A
GRB2	ATP8
GRB2	MYH9
GRB2	NCL
GRB2	RBBP6
GRB2	UBC
GRB2	TCERG1
GRB2	SNRNP200
GRB2	DNAJA3
GRB2	PBXIP1
GRB2	POLR2A
GRB2	RNF10
GRB2	TFG
GRB2	TSC2
GRB2	CFH
GRB2	POLR1D
GRB2	SHBG
GRB2	PPP3CA
GRB2	PDE4D
GRB2	PHACTR4
GRB2	SF3B4
GRB2	KPNA2
GRB2	REL
GRB2	TRIM27
GRB2	TP53BP2
GRB2	DDX17
GRB2	NIF3L1
GRB2	C1orf94
GRB2	INCA1
GRB2	CRBN
GRB2	MYOZ1
GRB2	PPARA
GRB2	RB1
GRB2	VCP
JUN	POU1F1
JUN	RB1
JUN	NFYA
JUN	SP1
JUN	TPM1
JUN	TAF1
JUN	TBP
JUN	STAT1
JUN	STAT4
JUN	PRKDC
JUN	SMAD4
JUN	PIN1
JUN	MAPK8
JUN	NACA
JUN	SMAD2
JUN	TDG
JUN	SMARCD1
JUN	MAPK3
JUN	SUMO1
JUN	NCOA3
JUN	NRIP1
JUN	NCOA1
JUN	TCF20
JUN	SMAD3
JUN	TRIP4
JUN	MYBBP1A
JUN	PRKD1
JUN	COPS5
JUN	HDAC3
JUN	UBE2I
JUN	RBM39
JUN	COBRA1
JUN	TPM2
JUN	PIAS1
JUN	STAT3
JUN	TOP1
JUN	MAPK11
JUN	NCOA2
JUN	SUMO4
JUN	TOP2A
JUN	SMARCD3
JUN	NFE2L2
JUN	UBB
JUN	MYOD1
JUN	RELA
JUN	NELFB
JUN	NCOA6
JUN	PML
JUN	NCOR2
JUN	UBC
JUN	EDF1
JUN	HDAC9
JUN	PIAS2
JUN	MAPK1
JUN	MTA1
JUN	NEDD4
JUN	TSG101
JUN	TRAF2
JUN	MAP3K1
JUN	SIRT1
JUN	NFATC2
JUN	KPNA2
JUN	MDM2
JUN	PPP3CA
JUN	PPARG
JUN	DNMT3L
POU1F1	PPARG
POU1F1	PPARA
POU1F1	MED1
POU1F1	NCOR1
RB1	GNB2L1
RB1	SP1
RB1	TGM2
RB1	SUV39H1
RB1	TAF1
[truncated: 17,688 more rows]

## Sheet: SAD-PPIs
Protein 1	Protein 2
ERBB2	PAK1
ERBB2	PICK1
ERBB2	GRB2
ERBB2	ESR1
ERBB2	PTK2
ERBB2	SRPK1
ERBB2	PSAP
PAK1	MAPK1
PAK1	RHOU
PAK1	YWHAG
PAK1	DYNLL1
PAK1	YWHAZ
PAK1	DYNLL2
PAK1	PPP2CA
DLG4	ERBB2
DLG4	PRKCA
DLG4	CASK
DLG4	NLGN3
DLG4	DYNLL1
DLG4	DLGAP2
DLG4	DLGAP1
DLG4	SCN5A
DLG4	KCNA2
DLG4	LRFN1
DLG4	NOS1
DLG4	DYNLL2
PICK1	F11R
MAPK1	RPS6KA1
MAPK1	PPP1R9B
MAPK1	TSC2
MAPK1	SNCA
MAPK1	MAPKAPK2
MAPK1	COPS6
MAPK1	UBE3A
HSPA8	DYNLL1
HSPA8	RGS2
HSPA8	UBC
HSPA8	YWHAG
HSPA8	YWHAQ
HSPA8	PARK2
HSPA8	SNCA
CALM1	RGS2
CALM1	EGFR
CALM1	ESR1
CALM1	EWSR1
CALM1	SNCA
CALM1	SNTA1
CALM1	ESR2
CALM1	YWHAE
CALM1	CRHR1
CALM1	AKAP9
CALM1	GNAS
CALM1	PAM
CALM1	YBX1
CALM1	SCN5A
CALM1	TSC2
CALM1	DRD2
CALM1	NOS3
CALM1	YWHAQ
CALM1	UBE3A
CALM1	MYO5A
CALM1	ERBB2
PRKCA	GNB2L1
PRKCA	RGS2
PRKCA	YWHAZ
PRKCA	YWHAG
PRKCA	PRKG1
PRKCA	F11R
PRKCA	PICK1
PTK2	TGFB1I1
PTK2	GIT1
PTK2	TSC2
PTK2	BBS10
PTK2	SRPK1
FZD5	GOPC
GNAI3	MTNR1A
GNAI3	HTR1A
GNAI3	RGS2
MAPK3	RPS6KA1
MAPK3	TSC2
MAPK3	MAPKAPK2
SKAP1	DYNLL2
GRB2	MAPK1
GRB2	PTK2
GRB2	SNTA1
GRB2	SKAP1
GRB2	RHOU
GRB2	PAK1
GRB2	RPS6KA1
GRB2	NCL
GRB2	UBC
GRB2	DLGAP1
GRB2	TSC2
GRB2	GIT1
GRB2	LNX1
GRB2	INCA1
PIN1	GPHN
PIN1	TSC2
PIN1	MTUS2
PIN1	SPERT
SMAD2	MAPK3
SMAD2	SMAD3
SMAD2	MAPK1
SMAD2	PAK1
SMAD2	TSC2
SMAD2	PPP2R1A
SMAD2	PSAP
SMAD2	RANBP9
SMAD2	SMAD9
SMAD2	EIF3L
SMAD2	PIN1
SMAD3	MAGI2
SMAD3	MAPK1
SMAD3	SF3B2
SMAD3	TSC2
SMAD3	YBX1
SMAD3	PPP2R1A
SMAD3	SMAD9
SMAD3	RANBP9
SMAD3	PIN1
SMAD3	NEDD4
SMAD3	ZMIZ1
SMAD3	TGFB1I1
SMAD3	MEOX2
UBE2I	ZBED1
UBE2I	RBM14
JUNB	SMAD3
JUNB	NINL
SCN5A	SNTA1
KCNA2	CNTNAP2
FLNA	YWHAG
FLNA	PRKCA
FLNA	PAK1
FLNA	MTNR1A
FLNA	SMAD3
FLNA	NLGN3
CTSB	CTSD
CTSB	RGS2
RABAC1	LNX1
RABAC1	RIN3
PRKG1	RGS2
AVP	OXTR
AVP	TXNDC17
AVP	KMT2A
OXTR	GPRASP1
OXT	OXTR
OXT	PREP
OXT	TXNDC17
MEOX1	CYFIP1
MEOX1	PARK2
MEOX2	CNTNAP2
MEOX2	NLGN3
MEOX2	PARK2
MEOX2	UBE3A
MEOX2	NTF3
MEOX2	PIN1
MEOX2	DYNLL2
MEOX2	MORN3
CCND1	CDKN1B
CCND1	GSK3B
CCND1	BRCA1
CCND1	CALM1
CCND1	ESR1
CCND1	TSC2
CCND1	RABEP1
CCND1	RANBP9
CCND1	PARK2
CDKN1B	GRB2
CDKN1B	YWHAE
CDKN1B	YWHAH
CDKN1B	TSC2
CDKN1B	YWHAG
CDKN1B	YWHAB
CDKN1B	YWHAQ
CDKN1B	UBE3A
CDKN1B	PIN1
CDKN1B	YWHAZ
CDKN1B	RPS6KA1
CDKN1B	UBE2I
GSK3B	PRKCB
GSK3B	PTK2
GSK3B	YBX1
GSK3B	TSC2
GSK3B	PRKCA
GSK3B	SMAD3
GSK3B	GIPC1
GSK3B	FZD5
GSK3B	SNCA
GSK3B	MAPK1
GSK3B	AKT3
GSK3B	RPS6KA1
ADRA1A	RGS2
ADRA1A	NOS1
ADRA1A	PPP1R9B
PAM	PRKCA
PAM	TSC2
YWHAB	EPB41L3
YWHAB	BCL2L11
YWHAB	YWHAG
YWHAB	YWHAE
YWHAZ	MAPKAPK2
YWHAZ	KIAA1377
YWHAZ	EPB41L3
NCL	STAU1
NCL	YWHAQ
CTSD	PSAP
CTSD	MAPK1
CTSD	SNCA
CTSD	NLGN3
YWHAG	RABEP1
YWHAG	EPB41L3
YWHAG	YWHAH
YWHAG	YWHAQ
YWHAG	CYFIP2
YWHAG	GIT1
YWHAG	NUFIP2
YWHAG	YWHAZ
GNAQ	RGS2
PRKAA1	TSC2
PRKAA1	ZBED1
PRKAA1	MTUS2
PRKAA1	HMBOX1
DYNLL1	BCL2L11
DYNLL1	DLGAP1
DYNLL1	TXNDC17
DYNLL1	GPHN
DYNLL1	BMF
DYNLL1	GNB2L1
DYNLL1	CCDC36
DDR1	RGS2
GIT1	KIAA1377
CANX	PRKCSH
CANX	MBTPS1
CANX	MTNR1A
CANX	SLC6A4
SMAD9	PSAP
SMAD9	RANBP9
SMAD9	CTR9
SMAD9	YWHAQ
SMAD9	UBE3A
YBX1	SLC6A4
YBX1	MAPK1
YBX1	RPS6KA1
COPB1	RGS2
COPB1	COPB2
COPB1	SNTA1
COPB1	XRCC6
COPB1	GRB2
COPB1	UBC
S1PR1	HTR1D
S1PR1	HTR1A
S1PR1	GNAI1
S1PR1	GNAI3
PPP2R5A	BEST1
DLGAP1	DYNLL2
CALR	SLC6A4
CALR	MTNR1A
CALR	UBE3A
DNM2	DYNLL1
DNM2	PTK2
DNM2	EIF3L
DNM2	GRB2
DNM2	SH3GL2
DNM2	MANEA
DNM2	RHOU
HSPA1A	YWHAQ
HSPA1A	PRKCA
HSPA1A	YWHAZ
HSPA1A	YWHAB
HSPA1A	YWHAG
HSPA1A	HSPA8
HSPA1A	PARK2
HSPA1A	SNCA
HSPA1A	SLC6A4
GBA	PSAP
GBA	NEDD4
GBA	SNCA
PSAP	ZBED1
PSAP	BACE1
PSAP	CELSR1
PSAP	MAFF
PSAP	COPS6
PSAP	SGK223
PSAP	UBE3A
PSAP	USP4
PSAP	NLGN3
PSAP	CPEB2
PRKCB	GNB2L1
PRKCB	RGS2
PRKCB	YWHAG
PRKCB	RASGRP3
NTRK2	DYNLL1
NTRK2	GIPC1
AKAP9	RBM14
AKAP9	SF3B2
XRCC6	YWHAZ
XRCC6	POR
XRCC6	SNTA1
XRCC6	SMAD3
XRCC6	RGS2
XRCC6	NCL
XRCC6	PIN1
XRCC6	UBC
RPS6KA1	YWHAB
RPS6KA1	TSC2
RGS2	COPB2
RGS2	GDE1
RGS2	GIT1
RGS2	NINL
RGS2	SCN5A
RGS2	DYNLL1
RGS2	ARFGAP1
RGS2	WDR74
RGS2	VPS29
RGS2	NIPSNAP1
RGS2	PPP1R9B
RGS2	LRFN1
RGS2	TSPAN15
RGS2	BBS10
RGS2	KIAA1377
RGS2	REEP5
RGS2	ZYX
RGS2	EIF3L
RGS2	IER3IP1
RGS2	ZNF579
RGS2	MON1A
RGS2	HAUS5
RGS2	DUSP21
RGS2	RABAC1
RGS2	UBC
RGS2	RIN3
RGS2	TUBB2B
RGS2	METTL18
RGS2	KLK8
RGS2	FZD5
RGS2	MTUS2
ADCY5	PRKCA
ADCY5	RGS2
ADCY5	GNAI1
ADCY5	GNAS
GRIA2	PRKCA
GRIA2	NSF
GRIA2	PICK1
PPP2CA	MAPK1
PPP2CA	MAPK3
PPP2CA	TSC2
PPP2CA	PPP2R1A
PPP2CA	BEST1
PPP2CA	PRKAA1
PPP2CA	RORC
PPP2CA	AKT3
RASGRP3	DYNLL2
PRKCG	RGS2
PRKCG	YWHAB
PRKCG	YWHAG
PRKCG	PICK1
PRKCG	YWHAE
APP	EPB41
APP	BACE1
APP	PIN1
APP	HOMER3
APP	GRB2
APP	CALR
APP	CTSD
APP	SNCA
APP	GSK3B
APP	YWHAG
APP	ARFGAP1
APP	DNM2
APP	LNX1
APP	SMAD3
APP	SH3GL2
APP	RASGRP3
APP	RAP1B
APP	TK1
APP	TBC1D7
APP	STAU1
APP	YWHAB
APP	GNAZ
APP	PAK1
APP	YWHAZ
APP	SF3B2
APP	BCL2L11
APP	PTK2
APP	MEOX1
APP	VPS29
APP	EPB41L1
APP	HMBOX1
APP	CTSB
APP	COPB1
APP	SRPK1
APP	UBE3A
APP	GNB5
APP	DUSP21
APP	SKAP1
APP	BDNF
APP	GNA15
APP	PRKCG
APP	NOS3
APP	EGFR
APP	UBE2I
APP	S1PR1
ADORA2A	DRD2
EWSR1	DYNLL2
EWSR1	MDFI
EWSR1	NINL
EWSR1	YWHAG
EWSR1	PRKCA
EWSR1	FXR2
RANBP9	BACE1
CTR9	CNTNAP2
CASK	CNTNAP2
CASK	F11R
CASK	RBM14
CASK	AKAP9
CASK	SF3B2
RAB2A	RGS2
RAB5A	TSC2
RAB5A	RABEP1
RAB5A	RABAC1
RAB5A	RIN3
TSC2	YWHAZ
TSC2	YWHAB
TSC2	RABEP1
TSC2	YWHAE
TSC2	YWHAG
TSC2	MAPKAPK2
TSC2	YWHAH
TSC2	AKT3
TSC2	FBXW5
TSC2	FBXL6
TSC2	YWHAQ
TSC2	UBE3A
TSC2	TBC1D7
TSC2	LNX1
TSC2	SPERT
RAP1B	RGS2
YWHAQ	EPB41L3
UBE3A	YWHAE
UBE3A	SGK223
UBE3A	YWHAZ
UBE3A	YWHAG
ADRB1	ARRB1
ADRB1	DLG4
ADRB1	GIPC1
ADRB1	DLGAP2
ADRB1	MAGI2
ADRB1	GRB2
ADRB1	SH3GL2
ADRB1	SH3GL3
ADRB1	GPRASP1
ADRB1	MAGI3
ADRB1	NOS1
ADRB1	DLG1
ADRB1	GOPC
ADRB1	GPRASP2
ADRB1	SNTA1
ARRB1	MAPK1
ARRB1	NSF
ARRB1	MAPK3
ARRB1	FLNA
ARRB1	GSK3B
ARRB1	EGFR
ARRB1	PARK2
NPAS2	ARNTL2
NPAS2	CLOCK
NPAS2	RORC
SRPK1	YWHAG
SRPK1	STAU1
HOMER3	DYNLL2
NSF	STX1A
NSF	KIAA1377
NSF	GABBR2
HTR1B	HTR1D
HTR1B	MDFI
SLC6A4	STX1A
ARRB2	OXTR
ARRB2	MAPK1
ARRB2	FLNA
ARRB2	PARK2
ARRB2	UBC
ARRB2	EGFR
DLG1	CASK
DLG1	KCNJ6
DLG1	DLGAP1
DLG1	SCN5A
DLG1	PARK2
DLG1	KCNA2
DLG1	EPB41
DLG1	UBE3A
EPB41L3	CNTNAP2
EPB41	YWHAB
EPB41	YWHAQ
EPB41	SMAD3
EPB41	CASK
EPB41	PRKCB
SSTR5	GOPC
EPB41L1	YWHAQ
EPB41L1	YWHAZ
EPB41L1	YWHAB
SPAG5	NLGN3
CYB5A	POR
CYB5A	CYP2D6
ADRB2	GRB2
ADRB2	GNA15
ADRB2	KCNJ6
ADRB2	KCNJ9
ADRB2	ARRB1
ADRB2	GPRASP1
ADRB2	NOS1
ADRB2	NEDD4
ADRB2	ARRB2
ADRB2	GNAS
ADRB2	GNAI2
ADRB2	GNB2L1
ADRB2	RGS2
EGFR	GRB2
EGFR	PAK1
EGFR	MAPK1
EGFR	SFN
EGFR	EPB41
EGFR	ESR1
EGFR	GNAI2
EGFR	XRCC6
EGFR	ERBB2
EGFR	PRKCA
EGFR	PTK2
EGFR	YWHAZ
EGFR	NCAM1
EGFR	CNTN2
EGFR	HSPA8
EGFR	HSPA1A
EGFR	NEDD4
EGFR	PRKCB
EGFR	SNCA
EGFR	YWHAQ
EGFR	YWHAB
EGFR	SH3GL2
EGFR	SH3GL3
EGFR	NTRK2
EGFR	RGS2
EGFR	GNAI3
FGFR1	GRB2
FGFR1	NCAM1
FGFR1	RPS6KA1
FGFR1	NEDD4
FGFR1	HTR1A
YWHAH	EPB41L3
SFN	TSC2
SFN	GPRIN2
SFN	YWHAG
YWHAE	GPRIN2
YWHAE	YWHAH
YWHAE	YWHAG
YWHAE	YWHAZ
YWHAE	YWHAQ
YWHAE	AKAP9
YWHAE	CASK
YWHAE	RBM14
TGFB1I1	GIT1
CHD3	GIT1
CHD3	UBE2I
CHD3	CPE
CHD3	GSK3B
CHD3	RGS2
CHD3	UBC
CNTN2	CNTNAP2
DRD2	GIPC1
DRD2	CADPS
DRD2	CADPS2
DRD2	GRIA2
DRD2	NSF
DRD2	EPB41
DRD2	GNAZ
DRD2	GNAI2
DRD2	GNAI3
DRD2	SSTR5
DRD2	FLNA
DRD2	KCNJ6
DRD2	KCNJ9
DRD2	EPB41L1
DRD2	NCS1
DRD2	PPP1R9B
DRD2	CLIC6
DRD2	SLC6A3
DRD2	PAWR
DRD2	GNB5
CNTNAP2	ZMIZ1
RHEB	TSC2
RHEB	TSC1
RHEB	RABAC1
TSC1	TSC2
TSC1	YWHAZ
TSC1	YWHAG
TSC1	YWHAB
TSC1	YWHAE
TSC1	YWHAH
TSC1	YWHAQ
TSC1	TBC1D7
TSC1	RIN3
NEK1	TSC2
NEK1	YWHAH
NEK1	PPP2R5A
CRMP1	TK1
CRMP1	FXR1
CRMP1	RGS2
SH3GL3	GABBR2
KIAA1377	GPRASP2
XIAP	DYNLL2
XIAP	UBE2I
XIAP	UBC
XIAP	BRCA1
XIAP	DNM2
XIAP	GSK3B
PARK2	CASK
PARK2	RGS2
PARK2	YWHAH
PARK2	SNCA
PARK2	PICK1
PARK2	UBC
NEDD4	SCN5A
NEDD4	SLC6A3
NEDD4	AKT3
NEDD4	SNCA
NEDD4	UBC
NEDD4	TBC1D7
SH3GL2	SH3GL3
DLGAP2	DLGAP1
GPHN	DYNLL2
FMR1	FXR1
FMR1	STAU1
FMR1	NUFIP1
FMR1	FXR2
FMR1	CYFIP1
FMR1	CYFIP2
FMR1	UBE2I
FMR1	NUFIP2
FMR1	RANBP9
FMR1	YBX1
FMR1	NCL
FMR1	TDRD3
FMR1	INCA1
FMR1	MEOX1
FMR1	SPAG5
FMR1	FSD2
FMR1	AKAP9
FMR1	RBM14
FMR1	CASK
FMR1	SF3B2
FXR1	FXR2
FXR1	CYFIP2
FXR1	KIAA1377
FXR1	TDRD3
FXR2	CYFIP2
FXR2	RABAC1
FXR2	CYFIP1
FXR2	TDRD3
FXR2	HMBOX1
FXR2	RBM14
FXR2	AKAP9
BCL2L11	DYNLL2
BCL2L11	GNB2L1
SNCA	YWHAH
SNCA	YWHAB
SNCA	YWHAE
SNCA	UBC
SNCA	RABAC1
GNA15	PRKCA
GNA15	RGS2
PREP	SNCA
KCNJ6	KCNJ9
GNAS	RGS2
CD1B	PSAP
HTR1A	HTR1B
HTR1A	HTR1D
HTR1A	GABBR2
S1PR3	HTR1A
S1PR3	GNAQ
S1PR3	GNAI1
GPR26	HTR1A
PPP2R1A	PPP2R5A
PPP2R1A	SLC6A2
PPP2R1A	RORC
MTNR1A	GNB2L1
MTNR1A	SLC6A3
MTNR1A	YWHAB
MTNR1A	YWHAZ
CRHR1	UCN
CRHR1	GNAQ
CRHR1	UCN3
CRHR1	GNAI1
CRHR1	GNAO1
CRHR1	GNAS
CRHR1	SRPK1
NOS3	PPP2R5A
NOS1	PRKCA
NOS1	SNTA1
NOS1	DYNLL1
NOS1	DLGAP2
BDNF	NCAM1
BDNF	ESR1
BDNF	NTF3
BDNF	NOS3
BDNF	NTRK2
BDNF	MBTPS1
BDNF	CPE
BDNF	SORT1
BDNF	CADPS2
BDNF	AGO3
BDNF	F11R
BDNF	JUNB
BDNF	INPP5K
BDNF	RHOU
NCAM1	RHEB
ESR1	YWHAH
ESR1	JUNB
ESR1	GRB2
ESR1	GNAI1
ESR1	TSC2
ESR1	MAPK3
ESR1	SMAD3
ESR1	UBE2I
ESR1	FOXO1
ESR1	MAPK1
ESR1	SMAD2
ESR1	ESR2
ESR1	RPS6KA1
ESR1	PAK1
ESR1	YWHAQ
ESR1	HSPA8
ESR1	RANBP9
ESR1	GNB2L1
ESR1	NCL
ESR1	NSF
ESR1	PPP2R1A
ESR1	PRKCSH
NTF3	NTRK2
ESR2	YWHAH
ESR2	OXT
ESR2	SMAD2
ESR2	SMAD3
ESR2	YWHAQ
ESR2	MAPK1
ESR2	MEOX2
BRCA1	ESR1
BRCA1	JUNB
BRCA1	NUFIP1
BRCA1	PSAP
BRCA1	SMAD2
BRCA1	SMAD3
BRCA1	HSPA8
BRCA1	UBE3A
BRCA1	UBC
BRCA1	UBE2I
BRCA1	PREP
BRCA1	RANBP9
BRCA1	FXR2
AKT1	BRCA1
AKT1	GSK3B
AKT1	MAPKAPK2
AKT1	ESR2
AKT1	PAK1
AKT1	BCL2L11
AKT1	YBX1
AKT1	SMAD3
AKT1	SMAD2
AKT1	ESR1
AKT1	FOXO1
AKT1	NOS3
AKT1	AKT2
AKT1	TSC2
AKT1	XIAP
AKT1	CDKN1B
AKT1	YWHAZ
AKT1	S1PR1
AKT1	TSC1
AKT1	PPP2CA
AKT1	NEDD4
AKT1	CALM1
AKT1	ARRB2
AKT1	USP4
AKT1	SNCA
AKT1	APP
AKT1	PPP2R1A
AKT1	EGFR
AKT1	PICK1
AKT1	PRKCB
AKT1	ERBB2
AKT1	MTUS2
MDFI	PIN1
MDFI	FBXW5
MDFI	GPRIN2
MDFI	TSC2
MDFI	MEOX2
DYNC1I1	DYNLL1
DYNC1I1	STAU1
DYNC1I1	DYNLL2
DYNC1I1	GSK3B
DYNC1I1	DNM2
DYNC1I1	TK1
DYNC1I1	PIN1
GNAI2	MDFI
GNAI2	MTNR1A
CLOCK	ARNTL2
PRKCSH	RGS2
BMF	DYNLL2
CRH	CRHR1
MACF1	CNTNAP2
EPAS1	ARNTL2
EPAS1	SMAD3
EPAS1	EWSR1
EPAS1	ESR1
LNX1	SPERT
GNAI1	MTNR1A
GNAI1	GNAO1
LIG1	RGS2
DYNLL2	MORN3
DYNLL2	C12orf40
DYNLL2	CCDC36
UBC	YWHAB
UBC	YWHAG
UBC	YWHAZ
UBC	USP4
UBC	UBE3A
UBC	RABEP1
UBC	MACF1
COMT	RGS2
COMT	MTNR1A
TK1	COPS6
TK1	TSC2
TK1	USP4
TK1	INPP5K
TK1	IER3IP1
TK1	ARFGAP1
FOXO1	YWHAZ
FOXO1	PAK1
FOXO1	SMAD3
FOXO1	GSK3B
FOXO1	YWHAG
FOXO1	TSC2
FOXO1	SFN
ADRA2A	ADRB1
ADRA2A	GNAI1
ADRA2A	GNAO1
ADRA2A	GNAI2
ADRA2A	YWHAZ
ADRA2A	PPP1R9B
ADRA2A	SNTA1
AKT2	TSC2
AKT2	ESR1
AKT2	XIAP
AKT2	GSK3B
AKT2	APP
CLTA	HSPA8
CLTA	EGFR
CLTA	RGS2
SLC6A2	STX1A
NINL	SPERT
ZBTB48	RGS2
GPRIN2	DYNLL2
GPRIN2	RHOU
DNAL4	DYNLL2
THAP10	DYNLL2
MTUS2	LNX1
SLC6A3	GNB2L1
SLC6A3	STX1A
SLC6A3	SNCA
SLC6A3	TGFB1I1
SLC6A3	PICK1
SLC6A3	SNTA1
CYP2C9	POR
CYP2C9	CYP2D6
RORC	ARNTL2
RORC	CLOCK
MYO5A	DYNLL1
MYO5A	DYNLL2
MYO5A	DLGAP1
MYO5A	BMF
MYO5A	AKAP9
KMT2A	OXT
KMT2A	CTR9
REEP5	RABAC1
REEP5	ARFGAP1
HMBOX1	LNX1
HMBOX1	DYNLL2
CYP2D6	POR
SECISBP2L	DYNLL2

## Sheet: Specific Phobia-PPIs
Protein 1	Protein 2
DNA2	EP300
ZBTB49	ZBTB8A
ATP12A	PPIB
ATP12A	NPY
ATP12A	GNAI3
HIST1H1D	PRKCA
SETD1A	CXXC1
SETD1A	HIST2H3C
SETD1A	WDR82
KAT6A	HEMGN
KAT6A	HIST4H4
KAT6A	HIST3H3
KAT6A	HIST1H4I
KAT6A	HIST2H3C
KAT6A	HIST1H4A
KAT6A	HIST1H3A
SEPP1	THRA
CXCL8	BAG6
KMT2A	ASH2L
KMT2A	HIST2H3C
KMT2A	SVIL
KMT2A	HIST3H3
KMT2A	HIST1H4A
KMT2A	HIST1H3A
KMT2A	SET
KMT2A	TP53
KMT2A	POLR2A
BAG6	TP63
BAG6	UBQLN4
BAG6	IMMT
BAG6	PELP1
ORC2	HIST4H4
ORC2	HIST3H3
ORC2	CDT1
ORC2	TERF2
ACE	MYH9
HMGN2	UBC
HMGN2	TERF2
HMGN2	UBE2I
HMGN2	KAT2B
HMGN2	PRKACA
HMGN2	RPS6KA3
HMGN2	PRKCA
KRT31	ZNF148
KRT31	TSG101
KRT31	SNAI1
KRT31	PIN1
KRT31	P2RX7
HMGN1	MDM2
HMGN1	PPP1CC
HMGN1	LIG4
HMGN1	TERF2
HMGN1	NFE2
HMGN1	RPS6KA5
HMGN1	PRKACA
HMGN1	YWHAZ
HMGN1	RPS6KA3
HMGN1	PRKCA
HMGN1	HMGN2
HMGN1	IRF2
HOXD12	MAF
HOXD12	MAFG
GCKR	TRAF2
ADA	NR3C1
ADA	GRB2
ADA	ADORA2A
EPO	HIF1A
SNAI1	BRMS1
SNAI1	FBXL5
DAO	EP300
DAO	PEX5
GATA3	HDAC3
GATA3	HDAC1
GATA3	HIF1A
GATA3	SPI1
GATA3	SP1
GATA3	TAL1
GATA3	SATB1
GATA3	ZFPM2
SGCE	CWC15
SGCE	ARIH2
NAP1L1	SP1
NAP1L1	COPS2
NAP1L1	TP53
NPY	UBQLN1
NPY	BAG6
NPY	NR1H2
NPY	NPFFR2
NPY	NPFF
NPY	GHRL
NPY	NPY5R
NPY	PMCH
NPY	NPY2R
NPY	NPY1R
NPY	PPYR1
GAA	STAT2
HOXD13	SMAD2
HOXD13	SMAD1
HOXD13	SMAD5
NFIA	UBC
HOXD10	PBX1
HOXA11	YY1
HLF	MYB
MYBL1	HIPK2
MYBL1	NLK
MYBL1	NCL
MN1	NCOA3
IRF1	IRF2
IRF1	SET
IRF1	MDM2
IRF1	SPI1
IRF1	YBX1
IRF1	NPM1
IRF1	KEAP1
IRF1	KAT2B
IRF1	STAT1
IRF1	RELA
IRF1	NFKB1
HOXD4	SNAI1
HOXD4	RXRG
HOXD4	PBX1
GCM1	CAMK1
GCM1	HDAC3
SLC6A3	TGFB1I1
SLC6A3	STX1A
HNF1B	HIST1H3A
HIST1H1A	RPS6KA5
HIST1H1A	KAT2B
HIST1H1A	PRKCB
HIST1H1A	PRKCD
HIST1H1A	PRKCA
HIST1H1A	PRKDC
HIST1H1A	PELP1
HIST1H1A	RBBP4
HIST1H1A	NAP1L4
HIST1H1A	PTMA
FOSB	JUN
FOSB	JUNB
FOSB	JUND
HOXB1	PBX1
HOXB1	PAX6
MSH2	MYC
MSH2	HDAC6
MSH2	SUMO2
MSH2	PCNA
ZBTB48	ZBTB8A
HOXB9	SIRT1
HOXB9	KAT2B
HOXB9	TAL1
HOXB9	ING4
HOXA9	PBX1
HOXA9	SMAD2
HOXA9	SMAD4
HOXA9	JUN
HOXA9	PLSCR1
GLUL	NFKB1
GLUL	PPARD
GLUL	PIAS3
GLUL	PIAS1
GLUL	UBE2I
FOSL1	CALCOCO1
MAGEA11	NCOA2
MAGEA11	MAPK3
MAGEA11	ZBTB16
CFH	ZBTB16
CFH	VDR
CFH	SMAD3
NPY5R	NUPR1
SLC6A2	STX1A
HOXA10	SIRT2
HOXA10	PBX1
HOXA10	SPI1
MAOA	NDRG1
RUNX1	HIF1A
RUNX1	NEDD4
RUNX1	SPI1
RUNX1	CTBP2
RUNX1	PRMT1
RUNX1	RBM14
RUNX1	CDK1
RUNX1	HDAC3
RUNX1	HDAC1
RUNX1	KAT6A
RUNX1	MYOD1
RUNX1	VDR
RUNX1	SUV39H1
RUNX1	CEBPB
RUNX1	PAX5
RUNX1	JUN
RUNX1	FOS
RUNX1	HIPK2
RUNX1	FOXP3
RUNX1	CEBPA
RUNX1	EP300
MSX1	ING4
MSX1	SP1
MSX1	SUMO2
MSX1	PIAS1
MSX1	SUMO1
MSX1	TP53
EBF1	PAX5
ARIH2	KAT5
KAT5	HIST4H4
KAT5	ZBTB8A
KAT5	HIST2H3C
KAT5	SIRT1
ILF3	UBC
ILF3	YY1
ILF3	NDRG1
ILF3	PLSCR1
ILF3	MAGEA11
A2M	ACTB
A2M	RAD23A
A2M	PAXIP1
A2M	APP
A2M	CDKN1A
A2M	GRB2
A2M	NGF
ACTA2	YBX1
ACTA2	PRKCD
ACTA2	CREBBP
ACTA2	EP300
MLL	SVIL
MLL	ASH2L
MLL	SET
ING2	HIST3H3
ING2	COPS2
ING2	HIST4H4
ING2	SMAD1
HIST2H2AC	KAT2B
HIST2H2AC	HIST2H2BE
HIST2H2AC	HIST1H4A
HIST2H2AC	HIST2H4A
HIST2H2AC	HIST1H3A
HIST2H2AC	TAF1B
HIST2H2AC	PELP1
HIST2H2AC	KAT5
ETS1	NCL
ETS1	SPI1
ETS1	UBE2I
ETS1	STAT5B
ETS1	MAPK3
ETS1	MAF
ETS1	MAPK1
ETS1	POU1F1
ETS1	PAX5
ETS1	JUN
ETS1	FOS
ETS1	ETS2
ETS1	NFKB1
ETS1	NR3C1
ETS1	GATA3
ETS1	SRC
ETS1	SMAD3
ETS1	STAT6
ETS1	SP1
CREB1	DAXX
CREB1	YY1
CREB1	HDAC1
CREB1	EP300
CREB1	PIAS1
CREB1	UBE2I
CREB1	SREBF2
CREB1	HNF1B
CREB1	PRKACA
CREB1	FHL2
CREB1	RBBP4
CREB1	TP53
CREB1	SOX9
CREB1	HPS6
CREB1	THRA
CREB1	RPS6KA5
CREB1	RPS6KA1
CREB1	MAPK14
CREB1	CREBBP
CREB1	RPS6KA3
CREB1	NR3C1
CREB1	CREM
CREB1	SRF
CREB1	KAT5
FOXO1	SET
FOXO1	PRKACA
FOXO1	NCOA1
FOXO1	MDM2
FOXO1	SIRT2
FOXO1	SKP2
FOXO1	SMAD3
FOXO1	YWHAZ
FOXO1	SMAD4
FOXO1	HNF4A
FOXO1	SRC
FOXO1	HOXA10
FOXO1	PPARG
FOXO1	SIRT1
MITF	PIAS1
MITF	PIAS3
MITF	UBE2I
MITF	PAX6
MITF	SUMO1
MITF	SPI1
MITF	LEF1
MITF	RPS6KA1
MITF	MAPK1
GNAZ	PRKCD
AGT	ACE
AGT	TP53
AGT	GRB2
AGT	MEP1A
AGT	AGTR2
AGT	EWSR1
MYH9	UBE2I
MYH9	YWHAZ
MYH9	SVIL
MCM2	CDT1
MCM2	ORC2
MCM2	MCM4
MCM2	GNB5
MCM2	HIST3H3
MCM2	MCM5
MCM2	MCM3
FOXM1	HIF1A
FOXM1	SIRT1
FOXM1	SMAD3
FOXM1	SUMO1
FOXM1	UBE2I
FOXM1	SP1
FOXM1	STAT3
DBP	CLOCK
DBP	DDIT3
DBP	EPAS1
DBP	HLF
DBP	EP300
CEBPD	UBE2I
CEBPD	HDAC3
CEBPD	HDAC1
CEBPD	SMAD4
CEBPD	SMAD3
CEBPD	EP300
CEBPD	CREBBP
CEBPD	SPI1
CEBPD	RB1
CEBPD	RELA
CUX1	SUMO2
CUX1	MAX
CUX1	KAT2B
CUX1	CYTH2
CUX1	SATB1
CUX1	RB1
CUX1	HMGB1
HCK	TP73
HCK	MDM2
HCK	KHDRBS1
HCK	TSG101
HCK	PAK2
HCK	STAT3
LEF1	NLK
HNF1A	NCOA3
HNF1A	NCOA1
HNF1A	SIRT1
HNF1A	GATA5
HNF1A	HNF1B
HNF1A	KAT2B
COMT	KRT31
COMT	ACE
RUVBL2	NUFIP1
CAT	KEAP1
CAT	EHHADH
CAT	PEX5
CAT	SUMO4
CAT	TLR10
CAT	PTPN11
ABL2	STAT3
ABL2	MDM2
ABL2	GRB2
ABL2	TRIP10
ABL2	NEDD4
ABL2	HCK
ABL2	CAT
ACTB	ESR1
ACTB	EHHADH
ACTB	KHDRBS1
ACTB	EP300
ACTB	AR
ACTB	PLG
ACTB	CDKN1A
ACTB	POLR2A
ACTB	SMAD3
ACTB	SVIL
ACTB	P2RX7
ACTB	PRKCD
ACTB	LYN
ACTB	MAPT
ACTB	HCK
ACTB	EEF1A1
ACTB	HNRNPU
UBC	KDM3B
UBC	KEAP1
UBC	KHDRBS1
UBC	HERC1
UBC	TRIP4
UBC	RBCK1
UBC	UBQLN4
UBC	ZC3H12A
UBC	HIST2H2BE
UBC	HIST2H2AC
UBC	ANAPC7
UBC	ZNF148
UBC	NCOA6
UBC	BCAS2
UBC	DECR2
UBC	ARIH2
UBC	UBQLN1
UBC	TNIP2
UBC	IKBKG
UBC	PPARGC1A
UBC	HDAC6
UBC	YWHAZ
HIST1H2AB	KAT5
HIST1H2AB	KAT2B
HIST1H2BB	MYB
HIST1H2BB	HIST1H2AB
HIST1H2BB	RPS6KA5
HIST1H2BB	KAT2B
HIST1H2BB	EID1
NPFF	ZDHHC17
NPFF	NPFFR2
HOXB6	HOXB7
HOXB6	PLSCR1
MPG	RAD23A
MGMT	PCNA
MGMT	PRKACA
MGMT	PRKCA
MAX	ZBTB17
MAX	MYC
MAX	SNIP1
MAX	MSH2
CAMKK2	CEP63
IRF2	SPI1
IRF2	MDM2
IRF2	PRKACA
IRF2	KAT2B
IRF2	RELA
IRF2	NFKB1
IRF2	STAT1
HOXB7	PRKDC
HOXB7	PBX1
HSF1	NCOA6
HSF1	MAPK1
HSF1	UBE2I
HSF1	HSPA1A
HSF1	SUMO1
HSF1	MAPK3
HSF1	MAPK8
HSF1	PRKDC
HSF1	STAT1
HSF1	SUB1
EGR1	WT1
EGR1	SREBF2
EGR1	NFATC1
EGR1	EP300
EGR1	NFATC2
EGR1	TP53
EGR1	JUN
EGR1	RELA
EGR1	SP1
CNOT4	UBE2D1
DDIT3	GABBR2
DDIT3	FOSL2
DDIT3	EP300
DDIT3	GIPC1
DDIT3	IKBKG
DDIT3	KPNA2
DDIT3	JUNB
DDIT3	FOSL1
DDIT3	MAFG
DDIT3	EPAS1
DDIT3	JUND
DDIT3	JUN
DDIT3	FOS
CEBPA	HIF1A
CEBPA	DDIT3
CEBPA	ZBTB16
CEBPA	SKP2
CEBPA	FOSL1
CEBPA	ATF5
CEBPA	FOS
CEBPA	XRCC6
CEBPA	MAX
CEBPA	MAPK8
CEBPA	SMAD4
CEBPA	SMAD3
CEBPA	ESR1
CEBPA	NCOA6
CEBPA	CREBBP
CEBPA	EP300
CEBPA	GATA2
CEBPA	PIAS1
CEBPA	MYC
CEBPA	CEBPB
CEBPA	RB1
CEBPA	SPI1
CEBPA	HNF1A
CEBPA	NR3C1
CEBPA	DBP
CEBPA	ATF2
CEBPA	CEBPD
CEBPA	CTNNB1
CREM	PIAS3
CREM	UBE2I
CREM	EMP3
CREM	MAPK3
CREM	HDAC1
CREM	PRKACA
CREM	PRKCA
CREM	SPI1
CREM	CSNK2A2
CREM	CSNK2A1
ATF2	ZDHHC17
ATF2	SUMO1
ATF2	DDIT3
ATF2	FOSL1
ATF2	MAPK10
ATF2	ETS1
ATF2	YY1
ATF2	MAPK1
ATF2	PML
ATF2	CREBBP
ATF2	NCOA6
ATF2	JDP2
ATF2	RUVBL2
ATF2	UBE2I
ATF2	SMAD3
ATF2	HIST2H2BE
ATF2	MAPK8
ATF2	SMAD4
ATF2	HMGA1
ATF2	MAPK14
ATF2	RB1
ATF2	JUN
ATF2	FOS
ATF2	RPS6KA5
ATF2	NBN
ATF2	CSNK2A2
ATF2	CSNK2A1
CDKN1A	PRKACA
CDKN1A	MAPK14
CDKN1A	TCF4
CDKN1A	KRT31
CDKN1A	NR1H2
CDKN1A	GCKR
CDKN1A	TNIP2
CDKN1A	SKP2
CDKN1A	RBBP4
CDKN1A	ING5
CDKN1A	NGFR
CDKN1A	MSH2
CDKN1A	GNB5
CDKN1A	EEF1A1
CDKN1A	COPS6
CDKN1A	ZBTB16
CDKN1A	ZBTB48
CDKN1A	UBE2D1
CDKN1A	BAG6
CDKN1A	TP53
CDKN1A	ATXN3
CDKN1A	NPM1
CDKN1A	IKBKG
CDKN1A	MDM4
CDKN1A	EP300
CDKN1A	HDAC6
CDKN1A	MDM2
CDKN1A	HDAC1
CDKN1A	ESR1
CDKN1A	MAP3K5
CDKN1A	POLD2
CDKN1A	SET
CDKN1A	TSG101
CDKN1A	MAPK8
CDKN1A	RB1
CDKN1A	PCNA
CDKN1A	XRCC6
CDKN1A	CEBPA
CDKN1A	STAT3
CDKN1A	CSNK2A1
GABBR2	ATF5
CHD4	SUMO2
CHD4	UBE2I
CHD4	HIST3H3
CHD4	CSNK2A1
CHD4	TWIST1
CHD4	HIST1H3A
CHD4	RBBP4
CHD4	RBBP7
CHD4	EP300
CHD4	HDAC1
ANAPC7	CDT1
GOLGA2	WT1
GOLGA2	PTPN11
GOLGA2	NOTCH1
GOLGA2	ZDHHC17
GOLGA2	SNW1
GOLGA2	MORF4L1
GOLGA2	KAT5
GOLGA2	BCAS2
GOLGA2	ZBTB16
GOLGA2	UBE2I
GOLGA2	PIN1
GOLGA2	KRT18
GOLGA2	HOXB9
GOLGA2	SVIL
GOLGA2	GPS2
EMP3	P2RX7
P2RX7	KRTAP10-8
P2RX7	TM9SF1
P2RX7	CASK
P2RX7	PANX1
P2RX7	SVIL
EPAS1	ETV4
EPAS1	KPNA6
EPAS1	ESR1
EPAS1	IKBKG
EPAS1	SIRT1
EPAS1	STAT5A
EPAS1	EWSR1
EPAS1	JUN
EPAS1	MEF2C
EPAS1	SMAD3
EPAS1	MAX
TCF3	UBE2I
TCF3	KAT2B
TCF3	HAND2
TCF3	TWIST1
TCF3	TCF12
IRF7	TP53
IRF7	SMAD2
IRF7	SMAD4
IRF7	SMAD3
IRF7	KAT2B
CRX	SMAD3
CRX	NPAS2
CRX	KAT2A
CRX	EP300
ELF3	SOX9
ELF3	XRCC6
ELF3	NFKB1
ELF3	EP300
ELF3	MYC
ELF3	JUN
EEF2	EP300
EEF2	ESR1
EEF2	TP53
EEF2	PPP2R1A
EEF2	NDRG1
TERF2	UBE2I
TERF2	PIAS1
TERF2	DDX24
KLF2	GATA5
CDH2	UBC
CDH2	CREBBP
CDH2	CTNNB1
CLOCK	SIRT1
EFNB3	YWHAZ
EFNB3	P2RX7
NAP1L4	HIST2H3C
NAP1L4	HIST2H2AC
NAP1L4	HIST2H4A
NAP1L4	HIST3H3
NAP1L4	HIST2H2BE
GNAI2	KRTAP10-8
GNAI2	KRT31
GNAI2	NPM1
GNAI2	SVIL
GNAI2	PLSCR1
GATA2	GOLGA2
GATA2	KAT2A
GATA2	SMAD4
GATA2	TAL1
GATA2	JUN
GATA2	ZBTB16
GATA2	HDAC3
GATA2	POU1F1
GATA2	SPI1
GATA2	MAPK1
GATA2	STAT3
GATA2	PML
ASCL1	MEF2D
ASCL1	MEF2C
ASCL1	EP300
ASCL1	UBQLN1
ASCL1	TCF4
ASCL1	MEF2A
SH3GL1	YWHAZ
NR1H4	SIRT1
NR1H4	NCOA6
NR1H4	PPARGC1A
STAT3	TDG
STAT3	TWIST1
STAT3	NUFIP2
STAT3	ZFPM2
STAT3	PELP1
STAT3	SS18L1
STAT3	STAT6
STAT3	TRIP10
STAT3	STAT4
STAT3	KPNA6
STAT3	SUMO4
STAT3	STAT5B
STAT3	STAT5A
STAT3	ZNF148
STAT3	NLK
STAT3	KAT5
STAT3	PIAS3
STAT3	RPS6KA5
STAT3	HDAC3
STAT3	NCOA1
STAT3	KHDRBS1
STAT3	HNF1A
PML	KAT6A
PML	NCOA2
PML	SH3GL1
PML	TP63
PML	SIRT1
PML	HIPK2
PML	PIAS1
PML	PPARG
PML	SATB1
PML	KAT5
PML	UBE2I
PML	SUV39H1
PML	PAXIP1
PML	HDAC3
PML	ZBTB16
PML	THRA
PML	SUMO2
PML	TP73
PML	SUMO1
PML	TDG
PML	SRF
PML	TP53
PML	SP1
PML	RB1
PML	RELA
PML	STAT3
UBE2D1	RBCK1
UBE2D1	BRMS1
UBE2D1	KAT2B
UBE2D1	NR1H2
UBE2D1	MKNK1
UBE2D1	ARIH2
UBE2D1	CADPS2
UBE2D1	HDAC6
AKT1	SP3
AKT1	SP1
AKT1	HDAC3
AKT1	TP53
AKT1	MSH2
AKT1	KAT2A
AKT1	HIF1A
AKT1	MYC
AKT1	ARNT
AKT1	BCL3
AKT1	HIST1H2BB
AKT1	PYGO2
AKT1	PRKCB
AKT1	MAPK8
AKT1	SNAI1
AKT1	KAT6A
AKT1	MAPT
AKT1	CSNK2A1
AKT1	PPP2R1A
AKT1	CTNNB1
AKT1	SIRT1
AKT1	KAT2B
AKT1	APP
AKT1	CALM1
AKT1	NEDD4
AKT1	SKP2
AKT1	CREBBP
AKT1	NOTCH1
AKT1	IKBKG
AKT1	PIAS1
AKT1	NPM1
AKT1	MAPK14
AKT1	RPS6KB1
AKT1	EP300
AKT1	FOXO3
AKT1	MAP3K5
AKT1	S1PR1
AKT1	YWHAZ
AKT1	MTOR
AKT1	CHUK
AKT1	AR
AKT1	FOXO4
AKT1	SRC
AKT1	MDM2
AKT1	HTT
AKT1	NR4A1
AKT1	FOXO1
AKT1	ESR1
AKT1	SMAD4
AKT1	SMAD7
AKT1	SMAD2
AKT1	SMAD3
AKT1	GATA1
AKT1	YBX1
AKT1	CREB1
AKT1	IKBKB
AKT1	HIST2H2BE
AKT1	ESR2
AKT1	PRKDC
AKT1	STAT1
AKT1	MDM4
AKT1	GATA2
AKT1	CDKN1A
AKT1	BRCA1
ATF1	CREM
ATF1	PRKACA
ATF1	GABPA
ATF1	HNF1B
ATF1	RPS6KA5
ATF1	CAMK1
ATF1	CREBBP
ATF1	SPI1
ATF1	JUN
ATF1	CREB1
ATF1	CSNK2A2
ATF1	CSNK2A1
ATF1	BRCA1
BRCA1	HIST2H2BE
BRCA1	POLB
BRCA1	SKP2
BRCA1	NCOA1
BRCA1	KAT5
BRCA1	FXR2
BRCA1	HIST1H2AB
BRCA1	PEX5
BRCA1	DDX24
BRCA1	RANBP9
BRCA1	ASH2L
BRCA1	PPP2R5C
BRCA1	CTNNB1
BRCA1	HIST2H2AC
BRCA1	PRMT1
BRCA1	PIAS1
BRCA1	UBE2I
BRCA1	SUMO1
BRCA1	UBC
BRCA1	ETS1
BRCA1	PRKDC
BRCA1	RAD50
BRCA1	MRE11A
BRCA1	NCOA3
BRCA1	NCOA2
BRCA1	UBE2D1
BRCA1	MSH6
BRCA1	MSH2
BRCA1	SMAD4
BRCA1	SMAD3
BRCA1	SMAD2
BRCA1	TP53BP1
BRCA1	FHL2
BRCA1	KPNA6
BRCA1	NUFIP1
BRCA1	YY1
BRCA1	STAT3
BRCA1	MDC1
BRCA1	POLR2A
BRCA1	RBBP4
BRCA1	RBBP7
BRCA1	EP300
BRCA1	NBN
BRCA1	CTBP1
BRCA1	STAT5A
BRCA1	HDAC1
BRCA1	KPNA2
BRCA1	STAT1
BRCA1	USF2
BRCA1	CREBBP
BRCA1	ELK1
BRCA1	TP53
BRCA1	MYC
BRCA1	E2F1
BRCA1	SP1
BRCA1	RB1
BRCA1	JUND
BRCA1	JUNB
BRCA1	JUN
BRCA1	RELA
BRCA1	NFKB1
BRCA1	ESR1
BRCA1	CCNB1
BRCA1	CDK2
BRCA1	CDK1
BRCA1	CSNK2A1
SATB1	SIRT1
SATB1	SUMO1
SATB1	PIAS3
SATB1	PIAS1
SATB1	KAT2B
SATB1	UBE2I
RPS6KB2	KAT2B
RPS6KB2	IKBKG
RPS6KB2	SRC
MTOR	SKP2
MTOR	SUMO1
MTOR	PRKCA
MTOR	STAT3
MTOR	RPS6KA1
MTOR	RPS6KB2
MTOR	RPS6KB1
MTOR	UBQLN1
ESR2	PLSCR1
ESR2	KAT5
ESR2	MAPK1
ESR2	TRIP4
ESR2	NCOA2
ESR2	MSH2
ESR2	PIAS3
ESR2	PIAS1
ESR2	ZBTB17
ESR2	PPARGC1A
ESR2	SMAD3
ESR2	SMAD2
ESR2	SMAD4
ESR2	SRC
ESR2	SREBF1
ESR2	BCAS2
ESR2	SP1
ESR2	PELP1
ESR2	NCOA6
ESR2	NCOA1
ESR2	NCOA3
ESR2	STAT5A
ESR2	YWHAH
MCM4	CDT1
MCM4	ORC2
MCM3	KEAP1
MCM3	PPP2R1A
MCM3	STAT1
MCM3	POLR2A
MCM3	MCM4
MCM3	MCM3AP
MCM3	MCM5
KRT18	IKBKG
KRT18	YWHAZ
KRT18	RPS6KA3
KRT18	PRKCA
KRT18	SVIL
KRT18	YWHAH
CDC25B	CDK2
CDC25B	MAPK14
CDC25B	KAT2B
CDC25B	YWHAZ
CDC25B	CREBBP
CDC25B	ESR1
CDC25B	CSNK2A1
CDC25B	YWHAH
ESR1	MTOR
ESR1	HBP1
ESR1	HIST2H2AC
ESR1	SET
ESR1	PPP2R1A
ESR1	PPIB
ESR1	NSF
ESR1	NPM1
ESR1	NCL
ESR1	NAP1L4
ESR1	KRT18
ESR1	ILF3
ESR1	H3F3A
ESR1	SND1
ESR1	HDAC3
ESR1	POLR2A
ESR1	SUV39H1
ESR1	SKP2
ESR1	RANBP9
ESR1	RBCK1
ESR1	DDX17
ESR1	MED25
ESR1	TADA3
ESR1	GRIP1
ESR1	MSH2
ESR1	TAF1B
ESR1	HDAC1
ESR1	ING1
ESR1	RBBP4
ESR1	RBBP7
ESR1	SVIL
ESR1	MGMT
ESR1	PTMA
ESR1	PIAS1
ESR1	ZBTB16
ESR1	PELP1
ESR1	NCOA2
ESR1	NCOA6
ESR1	PPARGC1A
ESR1	TRIP4
ESR1	NCOA1
ESR1	NCOA3
ESR1	RPS6KA1
ESR1	ESR2
ESR1	STAT5A
ESR1	TDG
ESR1	SMAD2
ESR1	RPS6KA3
ESR1	FOXO4
ESR1	TP53
ESR1	SRC
ESR1	MAPK1
ESR1	JUN
ESR1	MDM2
ESR1	FOXO1
ESR1	NR1H4
ESR1	KAT5
ESR1	THRA
ESR1	ZBTB17
ESR1	PIAS3
ESR1	UBE2I
ESR1	GTF2B
ESR1	SMAD3
ESR1	PRMT1
ESR1	FOXO3
ESR1	SP3
ESR1	MAPK3
ESR1	PRKACA
ESR1	SMAD4
ESR1	HNF4A
ESR1	CITED1
ESR1	SP1
ESR1	SREBF1
ESR1	JUND
ESR1	RELA
ESR1	NFKB1
ESR1	GRB2
ESR1	FHL2
ESR1	MPG
ESR1	JUNB
ESR1	BCAS2
ESR1	YWHAH
FOXO3	TP53
FOXO3	CDT1
FOXO3	MAPK1
FOXO3	SKP2
FOXO3	VDR
FOXO3	NR1H2
FOXO3	IKBKB
FOXO3	SIRT1
FOXO3	SMAD3
FOXO3	SMAD2
FOXO3	YWHAZ
FOXO3	SMAD4
ILF2	PRKDC
DACH1	SMAD1
DACH1	NFIC
DACH1	TCF3
DACH1	MYC
DACH1	FOXO1
DACH1	JUN
DACH1	UBE2I
DACH1	SMAD3
DACH1	SMAD4
RORA	SP1
RORA	NCOA1
RORA	NCOA2
NBN	HIST3H3
NBN	SNAI1
NBN	SUMO2
NBN	UBE2D1
NBN	NCL
NBN	SIRT1
NBN	MDC1
NBN	PRKDC
NBN	RAD50
MRE11A	SUMO2
MRE11A	MDC1
MRE11A	PRKDC
MRE11A	RAD50
MRE11A	NBN
UBQLN1	GHRL
UBQLN1	UBQLN4
NEUROD1	TCF3
NEUROD1	TCF4
PIAS3	SNIP1
PIAS3	NCOA2
PPP2R1A	ARIH2
PPP2R1A	SLC6A2
ACVR1	IKBKB
ACVR1	VDR
ACVR1	CREBBP
ACVR1	SMAD5
ACVR1	SMAD1
PSME3	KLF2
PSME3	SIRT1
GATA6	SP1
GATA6	KLF2
GATA6	NKX2-1
ETV4	HIF1A
ETV4	JUN
ETV4	HTT
ETV4	SMAD2
ETV4	HOXD4
ETV4	SRF
GPR26	HTR1A
S1PR3	HTR1A
HTR1A	GABBR2
HTR1A	HTR1D
HTR1A	HTR1B
CTF1	EP300
KCNJ6	KCNJ9
PEX5	DECR2
PEX5	SSTR5
IMMT	UBQLN4
TCF4	UBE2I
TCF4	TP53
TCF4	TWIST1
TCF4	BCAS2
TCF4	HAND2
TCF4	TCF3
TCF4	HBP1
ARNTL	SIRT1
ARNTL	KAT2B
ARNTL	EP300
ARNTL	HLF
ARNTL	UBE2I
ARNTL	NPAS2
ARNTL	EPAS1
ARNTL	HIF1A
ARNTL	CLOCK
MC4R	PRKACA
MC4R	NPY
H3F3A	PELP1
H3F3A	SET
H3F3A	NEDD4
H3F3A	SUV39H1
H3F3A	KMT2A
H3F3A	KAT2B
H3F3A	CARM1
H3F3A	SS18
RUNX3	TP53
RUNX3	NOTCH1
RUNX3	SMAD3
RUNX3	EP300
RUNX3	HDAC1
BDKRB2	ACE
BDKRB2	PRKCD
BDKRB2	PTPN11
MCM5	ORC2
MCM5	STAT1
CARM1	GRIP1
CARM1	SRCAP
CARM1	NCOA2
NFATC4	NR1I2
NFATC4	MAPK8
NFATC4	YWHAZ
NFE2	MAPK8
NFE2	KAT2B
NFE2	NFE2L2
CAMK4	NOTCH1
CAMK4	NEDD4
CAMK4	RELA
CAMK4	CAMKK2
CAMK4	CREBBP
AIRE	DAXX
AIRE	HIST2H2BE
AIRE	HIST1H3A
AIRE	CREBBP
ONECUT1	KAT2B
PHOX2A	JUN
PHOX2A	HAND2
PHOX2A	PRKACA
PHOX2A	CREBBP
NEUROG1	TCF4
PROX1	RORA
BCL6	GATA1
BCL6	GOLGA2
BCL6	ZBTB17
BCL6	CTNNB1
BCL6	TWIST1
BCL6	TP53
BCL6	ZBTB7B
BCL6	PIN1
BCL6	CTBP1
BCL6	CREBBP
BCL6	SPI1
BCL6	HDAC1
BCL6	PML
BCL6	EP300
BCL6	MAPK1
BCL6	PPARD
BCL6	ZBTB16
BCL6	SP1
BCL6	JUND
BCL6	JUNB
BCL6	JUN
NFKB1	TFAP2A
NFKB1	PPARG
NFKB1	PELP1
NFKB1	YY1
NFKB1	PML
NFKB1	SRF
NFKB1	SP1
NFKB1	NCOA6
NFKB1	TRIP4
NFKB1	NCOA1
NFKB1	PRKACA
NFKB1	STAT6
NFKB1	NOTCH1
NFKB1	SPI1
NFKB1	TP53BP1
NFKB1	IKBKG
NFKB1	REL
NFKB1	TNIP2
NFKB1	RELA
NFKB1	KAT5
NFKB1	STAT3
BCL3	MAPK1
BCL3	CHUK
BCL3	CTBP2
BCL3	CTBP1
BCL3	EP300
BCL3	KAT5
BCL3	RUVBL2
BCL3	MAPK3
BCL3	HDAC6
BCL3	HDAC3
BCL3	HDAC1
BCL3	CTNNB1
BCL3	N4BP2
BCL3	GTF2B
BCL3	NCOA1
BCL3	CREBBP
BCL3	JUN
BCL3	FOS
BCL3	NFKB1
SS18	RBM14
NFIC	RELA
SRY	HDAC3
SVIL	TGFB1I1
CAMK1	CAMKK2
PAX6	SUMO1
PAX6	RB1
PAX6	PROX1
PAX6	HIPK2
PAX6	PBX1
NUFIP2	KRTAP10-8
CYFIP2	ZC3H12A
FXR2	DDX17
FXR2	AKAP9
FXR2	RBM14
FXR2	MORF4L1
FXR2	TDRD3
FXR2	CYFIP1
FXR2	ZBTB8A
FXR2	PSME3
FXR2	CYFIP2
FXR1	TDRD3
FXR1	CYFIP2
FXR1	FXR2
FMR1	SF3B2
FMR1	CASK
FMR1	RBM14
FMR1	AKAP9
FMR1	FSD2
FMR1	SPAG5
FMR1	MEOX1
FMR1	INCA1
FMR1	TDRD3
FMR1	NCL
FMR1	YBX1
FMR1	RANBP9
FMR1	NUFIP2
FMR1	UBE2I
FMR1	CYFIP2
FMR1	CYFIP1
FMR1	FXR2
FMR1	NUFIP1
FMR1	STAU1
FMR1	FXR1
ZFPM2	UBQLN4
NEDD4	SERTAD1
NEDD4	SAV1
NEDD4	SRC
NEDD4	HNRNPUL1
NEDD4	PPARG
NEDD4	UBE2D1
NEDD4	CAMKK2
NEDD4	TAF1B
NEDD4	RBCK1
NEDD4	UBC
NEDD4	RPS6KA3
NEDD4	RPS6KB1
NEDD4	CALCOCO1
NEDD4	YY1
NEDD4	SLC6A3
NEDD4	NTRK1
NEDD4	POLR2A
NEDD4	TP73
NEDD4	NFE2
NEDD4	N4BP2
HIST1H3A	HDAC6
HIST1H3A	HDAC3
HIST1H3A	SIRT1
HIST1H3A	ING4
HIST1H3A	SETD1A
HIST1H3A	COPS2
HIST1H3A	HIST1H4A
HIST1H3A	HIST2H4A
HIST1H3A	KAT5
HIST1H3A	PAXIP1
HIST1H3A	TAF1B
HIST1H3A	PELP1
HIST1H3A	NR1H4
HIST1H3A	GRIP1
HIST1H3A	EID1
HIST1H3A	KAT2B
HIST1H3A	ASH2L
HIST1H3A	CARM1
HIST1H3A	SIRT2
NR3C1	HIST1H3A
NR3C1	HDAC1
NR3C1	KAT5
NR3C1	SRC
NR3C1	NR4A1
NR3C1	MED25
NR3C1	HDAC6
NR3C1	SET
NR3C1	RBM14
NR3C1	PML
NR3C1	HMGB2
NR3C1	HMGB1
NR3C1	SVIL
NR3C1	RAN
NR3C1	NCOA3
NR3C1	TDG
NR3C1	RANBP9
NR3C1	COPS6
NR3C1	ZBTB16
NR3C1	PELP1
NR3C1	NCOA2
NR3C1	UBE2I
NR3C1	PBX1
NR3C1	NCOA6
NR3C1	PPARGC1A
NR3C1	STAT5B
NR3C1	ONECUT1
NR3C1	SMAD3
NR3C1	HNRNPU
NR3C1	NCOA1
NR3C1	TGFB1I1
NR3C1	SUMO1
NR3C1	PRKACA
NR3C1	STAT5A
NR3C1	TSG101
NR3C1	MAPK8
NR3C1	PRKDC
NR3C1	KPNA2
NR3C1	TP53
NR3C1	MAPK1
NR3C1	POU1F1
NR3C1	JUN
NR3C1	NCL
NR3C1	RELA
NR3C1	NFKB1
NR3C1	HSPA1A
NR3C1	GRIP1
NR3C1	NR2F2
NR3C1	SUMO4
NR3C1	MDM2
NR3C1	STAT3
NR3C1	YWHAH
MAGED1	AKAP9
KEAP1	KPNA6
C1R	EP300
C1R	CSNK2A1
ATXN3	TP53
ATXN3	HDAC6
ATXN3	SUMO1
ATXN3	RPS6KA1
ATXN3	MKNK1
ATXN3	KAT2B
ATXN3	HDAC3
ATXN3	UBC
ATXN3	UBQLN1
ATXN3	RAD23A
ING5	INCA1
MDC1	RAD50
PLAGL1	SUMO1
PLAGL1	KAT2B
PLAGL1	TP73
PLAGL1	UBE2I
PLAGL1	PML
PLAGL1	TP53
GPS2	KRT31
GPS2	HDAC1
GPS2	HDAC3
GPS2	TP53
SIRT1	HIPK2
TSG101	TNIP2
TSG101	PIAS1
TSG101	UBC
TSG101	AKAP9
HNF4A	PRKACA
HNF4A	NR1I2
HNF4A	MAPK1
HNF4A	MAPK3
HNF4A	SREBF1
HNF4A	HDAC3
HNF4A	TGS1
HNF4A	PRMT1
HNF4A	HNF1A
HNF4A	UBE2I
HNF4A	NCOA6
HNF4A	SP1
HNF4A	SIRT1
HNF4A	PROX1
HNF4A	NCOA1
HNF4A	PPARGC1A
HNF4A	NCOA2
HNF4A	SMAD3
HNF4A	SMAD2
HNF4A	SMAD4
HNF4A	SUB1
HNF4A	SREBF2
HNF4A	TP53
CHUK	UBC
CHUK	PAX8
CHUK	RPL27
CHUK	TNIP2
CHUK	CSNK2A1
CHUK	HTT
CHUK	PRKCD
CHUK	PRKCA
CHUK	HIST2H3C
CHUK	TP73
CHUK	UBE2I
CHUK	IKBKB
CHUK	PIAS1
CHUK	NFKB1
CHUK	IKBKG
CHUK	HIST3H3
CHUK	CREBBP
CHUK	SRC
CHUK	PRKCB
CHUK	PTPN11
CHUK	NCOA3
CHUK	RELA
CHUK	FOXO3
CHUK	ESR1
CHUK	CTNNB1
CHUK	TRAF2
CHUK	PRKDC
CHUK	TP53
TP63	KAT2B
TP63	COPS6
TP63	HIPK2
CTNNB1	SP1
CTNNB1	MAPK8
CTNNB1	UBE2D1
CTNNB1	PML
CTNNB1	NOTCH1
CTNNB1	SATB1
CTNNB1	CARM1
CTNNB1	KAT2A
CTNNB1	KMT2A
CTNNB1	ASH2L
CTNNB1	KAT2B
CTNNB1	HNF4A
CTNNB1	SMAD7
CTNNB1	ESR1
CTNNB1	HIF1A
CTNNB1	TCF4
CTNNB1	MITF
CTNNB1	NDRG1
CTNNB1	EP300
CTNNB1	TFAP2A
CTNNB1	RUVBL2
CTNNB1	NFKB1
CTNNB1	FOXO4
CTNNB1	FOXO1
CTNNB1	NCOA2
CTNNB1	IKBKB
CTNNB1	SMAD3
CTNNB1	FHL2
CTNNB1	TCF7L2
CTNNB1	SMAD2
CTNNB1	PIN1
CTNNB1	SMAD4
CTNNB1	SRC
CTNNB1	NR5A1
CTNNB1	LEF1
CTNNB1	TCF3
CTNNB1	HNF1A
CTNNB1	TRIP10
CCNB1	PRKDC
CCNB1	EP300
CCNB1	TP53BP1
CCNB1	TP73
CCNB1	RB1
CCNB1	CDT1
CCNB1	HIST1H1A
CCNB1	CDK2
CCNB1	FLNA
CCNB1	MEF2C
CCNB1	PIN1
CCNB1	PTMA
CCNB1	PCNA
CCNB1	KAT5
CCNB1	CDKN1A
CCNB1	CDK1
DTX1	UBE2D1
DTX1	EP300
DTX1	GRB2
DTX1	NOTCH1
KAT2A	TP53
KAT2A	UBE2I
KAT2A	PPARG
KAT2A	MYB
KAT2A	HIST3H3
KAT2A	HIST4H4
KAT2A	HIST2H4A
KAT2A	HIST2H3C
KAT2A	HIST2H2BE
KAT2A	HIST2H2AC
KAT2A	TCF3
KAT2A	PBX1
KAT2A	RELA
KAT2A	PYGO2
KAT2A	EID1
KAT2A	HIST1H4A
KAT2A	HIST1H3A
KAT2A	PRKDC
KAT2A	IRF2
KAT2A	IRF1
KAT2A	MYC
KAT2A	TACC2
KAT2A	SIRT2
KAT2A	IRF7
KAT2A	NOTCH1
AGTR2	ACE
AGTR2	GNAI3
AGTR2	GNAI2
AGTR2	ZBTB16
ZBTB17	ZBTB49
GMEB1	SNIP1
GMEB1	GMEB2
HDAC6	JDP2
HDAC6	HIST4H4
HDAC6	BRMS1
HDAC6	SIRT2
HIPK2	NLK
POLR2A	TP53
POLR2A	CALCOCO1
POLR2A	KAT2B
POLR2A	SUB1
POLR2A	MDC1
POLR2A	SND1
DRD2	GNB5
DRD2	PAWR
DRD2	SLC6A3
DRD2	CLIC6
DRD2	PPP1R9B
DRD2	NCS1
DRD2	EPB41L1
DRD2	KCNJ9
DRD2	KCNJ6
DRD2	FLNA
DRD2	SSTR5
DRD2	GNAI3
DRD2	GNAI2
DRD2	GNAZ
DRD2	EPB41
DRD2	NSF
DRD2	GRIA2
DRD2	CADPS2
DRD2	CADPS
DRD2	GIPC1
TP53BP1	HIST2H4A
TP53BP1	NCOA3
TP53BP1	HIST1H4A
TP53BP1	HIST4H4
TP53BP1	MDC1
TP53BP1	PAXIP1
MEF2A	MEOX1
MEF2A	UBE2I
MEF2A	MYOD1
MEF2A	SUMO1
MEF2A	THRA
MEF2A	MEF2D
STAT6	NCOA2
STAT6	ZBTB2
STAT6	TP53
STAT6	HIST2H3C
STAT6	NCOA1
STAT6	SND1
ZEB1	KAT5
GABPA	SP3
GABPA	SP1
KLF4	KAT5
MEF2D	SKP2
MEF2D	PRKACA
MEF2D	HDAC3
MEF2D	CARM1
MEF2D	NFATC2
MEF2D	SP1
MEF2C	UBE2I
MEF2C	YWHAZ
MEF2C	MYOD1
MEF2C	NOTCH1
MEF2C	NCOA2
MEF2C	MEF2D
MEF2C	SP1
NFYB	YBX1
NFYB	TP53
NFYB	TP73
NFYB	SP1
TFDP1	TP53BP1
TFDP1	SERTAD2
TFDP1	TP53
SKP2	KPNA6
SKP2	YY1
SKP2	TCF3
SKP2	TAL1
SKP2	NLK
SKP2	CDT1
HIST2H4A	RPS6KA5
HIST2H4A	KAT5
HIST1H4A	COPS2
HIST1H4A	TAF1B
HIST1H4A	PELP1
HIST1H4A	HDAC3
HIST1H4A	EID1
HIST1H4A	KAT2B
HIST1H4A	KAT5
FOXO4	REL
FOXO4	NLK
FOXO4	PIN1
FOXO4	YWHAZ
IKBKG	ZC3H12A
IKBKG	SNW1
IKBKG	RBCK1
IKBKG	TNIP2
NGFR	TP53
NGFR	TRAF2
NGFR	MAGED1
NGFR	NTRK1
NGFR	MAPK3
NGFR	MAPK1
NGFR	SORT1
RPS6KA5	HIST2H3C
RPS6KA5	HIST4H4
TGFB1I1	UBQLN4
NR4A1	TRAF2
NR4A1	NDRG1
NR4A1	PPARG
NR4A1	STAT3
NR4A1	NFKB1
NR4A1	SMAD3
NR4A1	TCF4
NR4A1	MAPK8
NR4A1	NCOA2
NR4A1	KAT2B
NR4A1	NCOA1
NR4A1	NCOA3
NR4A1	RXRG
NR4A1	MAPK1
NR4A1	TP53
NR4A1	PML
NR4A1	YWHAZ
NR4A1	RPS6KA5
NR4A1	RPS6KA3
NR4A1	RPS6KA1
CDX2	HNF1A
CDX2	CREBBP
CDX2	MAPK14
CDX2	MAPK1
CDX2	PAX6
CDX2	EP300
NPM1	RB1
NPM1	SP1
NPM1	HEMGN
NPM1	RELA
NPM1	UBC
NPM1	HIST1H4A
NPM1	HIST2H2BE
NPM1	HIST2H2AC
NPM1	HIST1H3A
NPM1	YY1
NPM1	CDT1
NPM1	HIST3H3
NPM1	HAND2
NPM1	SENP3
NPM1	TP53
NPM1	TFAP2A
HTT	RPS6KB1
HTT	PML
HTT	ING5
HTT	PIAS1
HTT	IKBKG
HTT	IKBKB
HTT	KAT2B
HTT	ZDHHC17
HTT	TP53
HTT	SP1
HTT	TRIP10
HTT	SUMO1
YWHAH	NCOA2
YWHAH	NCOA1
YWHAH	NCOA3
FGFR1	HTR1A
FGFR1	RPS6KA3
FGFR1	NEDD4
FGFR1	RPS6KA1
FGFR1	GRB2
FOS	MAPK3
FOS	PIN1
FOS	SET
FOS	HSPA1A
FOS	SIRT1
FOS	UBE2D1
FOS	UBE2I
FOS	CARM1
FOS	NCOA3
FOS	NCOA2
FOS	PML
FOS	VDR
FOS	SPI1
FOS	NCOA6
FOS	GATA4
FOS	NCOA1
FOS	RPS6KA1
FOS	PRKACA
FOS	USF2
FOS	RB1
FOS	MAF
FOS	MAPK1
FOS	JUND
FOS	JUN
FOS	RELA
FOS	NFKB1
FOS	MITF
FOS	HNF1A
FOS	SUMO4
FOS	SMAD3
FOS	STAT1
FOS	JUNB
FOS	SUMO2
FOS	SUMO1
HIST3H3	MIER1
HIST3H3	MORF4L1
HIST3H3	TADA3
HIST3H3	TAF6L
HIST3H3	NCOA2
HIST3H3	ING4
HIST3H3	KDM3B
HIST3H3	KAT5
HIST3H3	TDRD3
HIST3H3	KAT2B
HIST3H3	ASH2L
HIST3H3	RPS6KA5
GATA4	SP1
GATA4	MAPK1
GATA4	MDC1
GATA4	PIAS1
GATA4	NFATC4
GATA4	ZFPM2
GATA4	HAND2
GATA4	MAPK3
GATA4	MEF2C
GATA4	SRF
YY1	RUVBL2
YY1	KAT2B
YY1	ZRANB2
YY1	HDAC3
EHHADH	PEX5
CDK2	SIRT2
CDK2	GATA3
CDK2	HIST1H2BB
CDK2	HIST1H2AB
CDK2	ESR1
CDK2	MAPT
CDK2	CTNNB1
CDK2	HIST1H4A
CDK2	PML
CDK2	SMAD2
CDK2	TFDP1
CDK2	NPAT
CDK2	MCM2
CDK2	HIST1H1D
CDK2	KAT2A
CDK2	KAT2B
CDK2	PIN1
CDK2	HIST1H1A
CDK2	SP1
CDK2	IKBKG
CDK2	ORC2
CDK2	E2F1
CDK2	XRCC6
CDK2	INCA1
CDK2	EP300
CDK2	POLD2
CDK2	NPM1
CDK2	MCM4
CDK2	SMAD3
CDK2	CDX2
CDK2	CDT1
CDK2	MCM3
CDK2	FOXM1
CDK2	TP73
CDK2	SKP2
CDK2	MYBL2
CDK2	UBTF
CDK2	FEN1
CDK2	TP53
CDK2	PTMA
CDK2	RB1
CDK2	PCNA
CDK2	LYN
CDK2	MYOD1
CDK2	CDKN1A
CDK2	CEBPA
CDK1	CEP63
CDK1	GATA2
CDK1	HIST1H2BB
CDK1	HIST1H2AB
CDK1	NCL
CDK1	EP300
CDK1	SIRT1
CDK1	TP53BP1
CDK1	HIST1H4A
CDK1	PML
CDK1	TFDP1
CDK1	UBE2I
CDK1	SP1
CDK1	HIST1H1A
CDK1	HIST1H1D
CDK1	HMGB1
CDK1	PPP2R1A
CDK1	MCM4
CDK1	MEF2C
CDK1	MDM4
CDK1	MAPT
CDK1	KAT5
CDK1	CDKN1A
CDK1	ZBTB16
CDK1	SPAG5
CDK1	RPS6KB1
CDK1	CDT1
CDK1	GOLGA2
CDK1	KHDRBS1
CDK1	FOXM1
CDK1	TP73
CDK1	PIN1
CDK1	HMGA1
CDK1	FEN1
CDK1	TP53
CDK1	E2F1
CDK1	PTMA
CDK1	RB1
CDK1	PCNA
CDK1	LYN
CDK1	NPM1
CDK1	KRT18
CDK1	CREM
CDK1	CDC25B
CDK1	CUX1
CDK1	CSNK2A1
CDK1	MYC
MAPK10	RELA
MAPK10	TP53
EPB41L1	NR3C1
EPB41L1	YWHAZ
CRYAB	UBE2D1
CRYAB	CTNNB1
CRYAB	NGF
CRYAB	EPB41
AP1B1	ATR
AP1B1	PRKDC
AP1B1	SMAD2
AP1B1	CREBBP
AP1B1	CLTC
EPB41	PRKCB
EPB41	CENPJ
EPB41	KPNA2
EPB41	CASK
EPB41	SMAD3
MDM2	MYC
MDM2	KPNA6
MDM2	SIRT2
MDM2	SIRT1
MDM2	NGFR
MDM2	DDX24
MDM2	UBTF
MDM2	RUVBL2
MDM2	PPIB
MDM2	SRC
MDM2	SET
MDM2	WT1
MDM2	RELA
MDM2	NOTCH1
MDM2	PBX1
MDM2	NEDD4
MDM2	NCL
MDM2	SENP3
MDM2	TP63
MDM2	UBE2D1
MDM2	HIST3H3
MDM2	UBE2I
MDM2	RAD23A
MDM2	YY1
MDM2	HIST2H2BE
MDM2	UBC
MDM2	FOXO4
MDM2	MDC1
MDM2	PIAS1
MDM2	EID1
MDM2	KAT2B
MDM2	MDM4
MDM2	TP73
MDM2	SUMO1
MDM2	TSG101
MDM2	RB1
MDM2	PSME3
MDM2	JMY
MDM2	HIPK2
MDM2	UBQLN4
MDM2	TP53
MDM2	NPM1
MDM2	KAT5
MDM2	PML
CSNK2A2	TP63
CSNK2A2	TP53
CSNK2A2	MDM2
CSNK2A2	HDAC6
CSNK2A2	MGMT
CSNK2A2	RELA
CSNK2A2	NAP1L4
CSNK2A2	KLF1
CSNK2A2	SPIB
CSNK2A2	TCF7L2
CSNK2A2	HDAC1
CSNK2A2	PIN1
CSNK2A2	HMGA1
CSNK2A2	MYC
CSNK2A2	STX1A
CSNK2A2	FOS
CSNK2A2	NCL
STX1A	VPS18
SLC6A4	STX1A
HTR1B	HTR1D
NSF	GABBR2
NSF	STX1A
ARSF	EP300
ACTN3	BRCA1
ACTN3	TRAF2
ACTN3	REL
ACTN3	ADORA2A
SUMO2	ZBTB2
SUMO2	TP53BP1
SUMO2	RAD50
SUMO2	PELP1
SUMO2	MDC1
SUMO2	DDX17
SUMO2	HIPK2
SUMO2	PIAS3
SUMO2	PIAS1
SUMO2	LEF1
SUMO2	TDG
SUMO2	UBE2I
SUMO2	SENP3
RAD23A	ZBTB8A
RAD23A	UBC
RAD23A	TRAF2
RAD23A	UBQLN4
RPS6KB1	NR1I2
RPS6KB1	KAT2B
RPS6KB1	SRC
RPS6KB1	PPP1R9B
PAK2	MAPK3
PAK2	MAPK1
PAK2	MKNK1
PAK2	SRC
TAL1	TCF4
TAL1	TCF3
TAL1	KAT2B
CSK	KHDRBS1
CSK	FHL2
CSK	JUN
CSK	TGFB1I1
CSK	PRKACA
CSK	SRC
CSK	LYN
CSK	HCK
RXRG	NR1H4
RXRG	NR1I2
RXRG	NR1H2
RXRG	NCOA6
RXRG	VDR
RXRG	THRA
RXRG	SRF
[truncated: 2,800 more rows]
