# Supplementary material for: Generalized and social anxiety disorder interactomes show distinctive overlaps with striosome and matrix interactomes
Source: Sci Rep. 2021 Sep 15;11:18392. doi: 10.1038/s41598-021-97418-w (PMC8443595; doi:10.1038/s41598-021-97418-w)
Supplement: Supplementary file 3 — Supplementary Information 3. [file 41598_2021_97418_MOESM3_ESM.xlsx]

## Sheet: Title page
Generalized and social anxiety disorder interactomes show distinctive overlaps with striosome and matrix interactomes
Kalyani B. Karunakaran1, Satoko Amemori2, N. Balakrishnan1, Madhavi K. Ganapathiraju3,4* and Ken-ichi Amemori2*
1Supercomputer Education and Research Centre, Indian Institute of Science, Bangalore, India
2Institute for the Advanced Study of Human Biology, Kyoto University, Kyoto, Japan
3Department of Biomedical Informatics, School of Medicine, and 4Intelligent Systems Program, School of Computing and Information, University of Pittsburgh, Pittsburgh, USA
*Correspondence to: Ken-ichi Amemori (amemori.kenichi.7s@kyoto-u.ac.jp), Madhavi K. Ganapathiraju (madhavi@pitt.edu)
This file contains the list of protein-protein interactions (PPIs) from:
1. The striosome interactome
2. The matrix interactome

## Sheet: Striosome-PPIs
Protein 1	Protein 2
ERBB2	PAK1
ERBB2	PICK1
ERBB2	GRB2
ERBB2	ESR1
ERBB2	PTPN11
ERBB2	HSP90AA1
ERBB2	JAK2
ERBB2	PIK3R1
ERBB2	PLCG1
ERBB2	SOS1
ERBB2	SRC
ERBB2	ERBB3
ERBB2	SHC1
ERBB2	PTK2
ERBB2	PTK2B
ERBB2	IRS4
ERBB2	SOCS1
ERBB2	FER
ERBB2	RASA1
ERBB2	JAK1
ERBB2	IRS1
ERBB2	STAT3
ERBB2	STAT1
ERBB2	TEC
ERBB2	SYK
ERBB2	SH3BP2
ERBB2	SHC2
ERBB2	ITK
ERBB2	ANKS1B
ERBB2	CLNK
ERBB2	DOK4
ERBB2	BLNK
ERBB2	VAV1
ERBB2	SH2D2A
ERBB2	VAV3
ERBB2	EZR
ERBB2	PTPN6
ERBB2	PPM1A
ERBB2	DUSP18
ERBB2	STYX
ERBB2	GAB1
ERBB2	FGFR4
ERBB2	BECN1
ERBB2	MYC
ERBB2	PDGFRA
ERBB2	RAF1
ERBB2	TP53
PAK1	PLCG1
PAK1	RAC1
PAK1	PXN
PAK1	HGS
PAK1	MAPK1
PAK1	TGFBR1
PAK1	RHOU
PAK1	HIST1H4A
PAK1	SYN1
PAK1	FRS2
PAK1	YWHAG
PAK1	TGFBR2
PAK1	DYNLL1
PAK1	SHC1
PAK1	RAF1
PAK1	YWHAZ
PAK1	TGM2
PAK1	HIST1H3A
PAK1	PPM1A
PAK1	PPP2CA
PAK1	PPP1CA
DLG4	ERBB2
DLG4	LYN
DLG4	PRKCA
DLG4	HTR2A
DLG4	NLGN3
DLG4	HTR2C
DLG4	MAP3K10
DLG4	MAP1A
DLG4	PTK2B
DLG4	DYNLL1
DLG4	GRIN2D
DLG4	HGS
DLG4	KCND2
DLG4	ZDHHC17
DLG4	GRIN1
DLG4	DLGAP4
DLG4	TANC1
DLG4	HTT
DLG4	GRIN2B
DLG4	GRIK2
DLG4	CACNG2
DLG4	GRIN2A
DLG4	LRP8
DLG4	SRC
DLG4	FYN
DLG4	KHDRBS1
DLG4	PCDH10
DLG4	MDM2
PICK1	GRIP1
PICK1	UBQLN4
CD4	PIK3R1
CD4	CD28
CD4	DPP4
CD4	CXCL12
CD4	CCR5
CD4	LAT
CD4	PTPRC
CD4	CD5
CD4	LCK
CD4	CXCR4
CD4	MAPK14
CBL	VAV1
CBL	LYN
CBL	PLCG1
CBL	PTPN6
CBL	TYK2
CBL	ZAP70
CBL	ITK
CBL	SRC
CBL	SH3KBP1
CBL	SYK
CBL	NCK1
CBL	SHC1
CBL	PTK2B
CBL	LCP2
CBL	CRKL
CBL	KHDRBS1
CBL	CD2AP
CBL	FRS2
CBL	GRB2
CBL	PDGFRB
CBL	YWHAZ
CBL	PRKCA
CBL	EPHA2
CBL	PTPN11
CBL	KDR
CBL	CD40
CBL	EPOR
CBL	KIT
CBL	STAT5B
CBL	LAT2
CBL	OSTF1
CBL	ITCH
CBL	YWHAG
CBL	PIK3R1
CBL	LAT
CBL	PDGFRA
CBL	IGF1R
CBL	EGFR
CBL	FYN
CBL	HCK
CBL	INSR
CBL	CD5
CBL	LCK
CBL	CD19
CBL	RET
CBL	CRK
CBL	CSF1R
CBL	MET
CBL	SH3BP2
CBL	UBC
CBL	ITSN1
CBL	CDC42
CBL	MYH9
CBL	MAPK8
CBL	BLNK
CBL	TNS4
CBL	CTNNB1
CBL	ERBB2
CBL	TGFBR2
CBL	APPL1
CBL	STAT3
CBL	TGM2
CBL	JAK2
VAV1	ZYX
VAV1	LAT
VAV1	SOCS1
VAV1	BLNK
VAV1	CXCR4
VAV1	TUBB
VAV1	ZNF655
VAV1	ZAP70
VAV1	TUBA1A
VAV1	KHDRBS1
PLCG1	VAV1
PLCG1	ZAP70
PLCG1	GNB2L1
PLCG1	SOS1
PLCG1	SRC
PLCG1	WAS
PLCG1	SYN1
PLCG1	SYK
PLCG1	SHB
PLCG1	PTK2
PLCG1	IRS2
PLCG1	PTPRJ
PLCG1	TUB
PLCG1	SOS2
PLCG1	DGKZ
PLCG1	SH3BP2
PLCG1	LAT
PLCG1	PLD2
PLCG1	KHDRBS1
PLCG1	PKN2
PLCG1	PICALM
PLCG1	BAG3
PLCG1	PRKD1
PLCG1	AGAP2
PLCG1	VAV3
PLCG1	SNAP91
PLCG1	GIT1
PLCG1	USO1
PLCG1	LAT2
PLCG1	TNK1
PLCG1	TRPM7
PLCG1	SOCS7
PLCG1	TRPC3
PLCG1	PTPN11
PLCG1	ARHGEF5
PLCG1	VIL1
PLCG1	SHC1
PLCG1	TEC
PLCG1	GRAP
PLCG1	SH2D2A
PLCG1	BLNK
PLCG1	DAPP1
PLCG1	RHOU
PLCG1	SELE
PLCG1	RET
PLCG1	SYNCRIP
PLCG1	GAB2
PLCG1	TRIM14
TYK2	VAV1
TYK2	GNB2L1
TYK2	IRS2
TYK2	COPS5
MAPK1	VAV1
MAPK1	PTPN1
MAPK1	RB1
MAPK1	RXRA
MAPK1	SP1
MAPK1	TP53
MAPK1	RPS6KA3
MAPK1	SREBF2
MAPK1	SHC1
MAPK1	UBTF
MAPK1	RPS6KA1
MAPK1	NCOA3
MAPK1	KHDRBS1
MAPK1	PXN
MAPK1	NCOA1
MAPK1	PPP1R9B
MAPK1	STAT5B
MAPK1	GAB2
MAPK1	TPR
MAPK1	RET
MAPK1	STAT3
MAPK1	SOS1
MAPK1	MAPK8
MAPK1	RPS6KB1
MAPK1	FRS2
MAPK1	RAF1
MAPK1	TFCP2
MAPK1	REST
MAPK1	PRDX6
MAPK1	STYX
MAPK1	PTPRC
HRAS	VAV1
HRAS	PIK3R1
HRAS	PIK3CA
HRAS	SOS1
HRAS	PDGFB
HRAS	SRC
HRAS	IRAK1
HRAS	MAPK8
HRAS	SOS2
HRAS	DGKZ
HRAS	PIK3CD
HRAS	RASGRP1
HRAS	RABAC1
HRAS	IKZF3
HRAS	ITSN1
HRAS	TLR2
HRAS	RGS12
HRAS	RASA1
HRAS	INSR
HRAS	MLLT4
HRAS	RAF1
HRAS	RASGRF1
BTK	VAV1
BTK	LYN
BTK	CBL
BTK	ITK
BTK	PRKCE
BTK	PRKCA
BTK	WAS
BTK	SYK
BTK	TEC
BTK	GNAQ
BTK	KHDRBS1
BTK	BLNK
BTK	PRKD1
BTK	GNG2
BTK	DAPP1
BTK	RELA
BTK	KIT
BTK	PLCG1
BTK	IRAK1
BTK	PIK3AP1
BTK	TP53
BTK	ARHGAP17
BTK	EWSR1
BTK	HCK
BTK	JAK1
BTK	CD19
BTK	RPS6KB1
BTK	FYN
BTK	GRB2
BTK	BCL2L11
BTK	BECN1
BTK	MDM2
TGFBR1	TGFBR2
TGFBR1	GNA13
TGFBR1	RASD2
TGFBR1	SOCS6
TGFBR1	UBE2E3
TGFBR1	SQSTM1
TGFBR1	RANBP9
TGFBR1	APPL1
SYK	VAV1
SYK	TUBA4A
SYK	LAT
SYK	TUBA1A
SYK	BLNK
SYK	GAB2
SYK	PIK3AP1
SYK	TERF1
SYK	SH2D2A
SYK	RHOU
SYK	HGS
SHB	VAV1
SHB	ZAP70
SHB	SRC
SHB	LAT
TEC	VAV1
TEC	WAS
TEC	SOCS1
TEC	TP53
TEC	IKBKG
PTK2B	VAV1
PTK2B	LYN
PTK2B	PIK3R1
PTK2B	PTPN11
PTK2B	PTPN6
PTK2B	ZAP70
PTK2B	SRC
PTK2B	GRB2
PTK2B	SYK
PTK2B	JAK3
PTK2B	SHC1
PTK2B	PXN
PTK2B	BCAR1
PTK2B	GNA13
PTK2B	RASA1
PTK2B	IL7R
PTK2B	FLT1
PTK2B	STAT3
PTK2B	FGFR2
PTK2B	PTK2
PTK2B	FYN
PTK2B	GSN
PTK2B	GRIN2A
PTK2B	JAK1
PTK2B	JAK2
PTK2B	LCK
PTK2B	SOCS3
PTK2B	MAPT
LCP2	VAV1
LCP2	LYN
LCP2	PLCG1
LCP2	PTPN6
LCP2	ZAP70
LCP2	WAS
LCP2	SYK
LCP2	SHB
LCP2	NCK1
LCP2	SHC1
LCP2	LAT
LCP2	BLNK
LCP2	CLNK
LCP2	VAV3
LCP2	PTPRC
LCP2	PIK3R1
LCP2	TRAT1
LCP2	YWHAZ
ZYX	VAV3
SH3BP2	VAV1
SH3BP2	ZAP70
SH3BP2	SYK
SH3BP2	LAT
SH3BP2	VAV3
SH3BP2	SH3KBP1
SH3BP2	STAT3
SIAH2	VAV1
SIAH2	TRAF2
SIAH2	PIAS1
SIAH2	UBE2I
SIAH2	TINF2
SIAH2	TP53BP2
SIAH2	SETD2
SIAH2	STAT3
SIAH2	CHEK2
SIAH2	ZYX
SOCS1	IRS2
CBLB	VAV1
CBLB	ZAP70
CBLB	GRB2
CBLB	SH3KBP1
CBLB	SHC1
CBLB	CRKL
CBLB	BLNK
CBLB	PIK3R1
CBLB	RET
CBLB	NCK1
CBLB	FYN
CBLB	KIT
CBLB	SYK
CBLB	EGFR
CBLB	UBC
CBLB	CD2AP
CBLB	CRK
CBLB	APPL1
CBLB	LRRK2
BLNK	SH3KBP1
PECAM1	PIK3R1
PECAM1	PLCG1
PECAM1	PTPN11
PECAM1	PTPN6
PECAM1	PRKCE
PECAM1	SRC
PECAM1	PRPF40A
MST1R	PIK3R1
MST1R	PLCG1
MST1R	SRC
MST1R	SHC1
MST1R	YWHAZ
MST1R	RELA
MST1R	PPP1CA
TYRO3	IKBKG
TP53BP2	UTP14A
TP53BP2	YWHAG
TP53BP2	MTMR14
TP53BP2	ITCH
REL	SP1
REL	TBP
REL	RELA
REL	SIN3A
REL	ATXN1
REL	SDCBP
REL	OSTF1
REL	BMF
SP1	SREBF2
SP1	SP4
SP1	TAF4
SP1	VHL
SP1	NCOR1
SP1	NCOR2
SP1	TP53
SP1	TBP
SP1	SUB1
TBP	TP53
TBP	TAF7L
TBP	SUB1
TBP	UBTF
TBP	NCOA3
TBP	NCOA1
TBP	EDF1
TBP	HAP1
TBP	PIAS1
TBP	TAF8
TBP	UBE2I
TBP	HIST3H3
MAPK8	REL
MAPK8	RET
MAPK8	TP53
MAPK8	PXN
MAPK8	IKBKAP
MAPK8	BCL2L11
MAPK8	DUSP10
MAPK8	STAT3
MAPK8	BMF
MAPK8	YWHAZ
MAPK8	SHC1
MAPK8	RPS6KB1
MAPK8	TFCP2
MAPK8	NCOA3
MAPK8	ITCH
MAPK8	PKMYT1
MAPK8	RAF1
MAPK8	SP1
HSPA8	REL
HSPA8	RB1
HSPA8	RAF1
HSPA8	SP1
HSPA8	DYNLL1
HSPA8	ABI1
HSPA8	BAG3
HSPA8	TCERG1
HSPA8	PPID
HSPA8	UBC
HSPA8	CXCR4
HSPA8	YWHAG
HSPA8	MAPT
HSPA8	CYCS
HSPA8	HSP90AA1
HSPA8	JAK2
HSPA8	TP53
HSPA8	BAG4
HSPA8	PARK2
HSPA8	HGS
HSPA8	MAPK8
HSPA8	ATP13A2
HSPA8	TGM2
HSPA8	JUN
HSPA8	VHL
HSPA8	HIST1H3A
CALM1	REL
CALM1	FER
CALM1	KRAS
CALM1	MYO7A
CALM1	EGFR
CALM1	ESR1
CALM1	EWSR1
CALM1	HSP90AA1
CALM1	INSR
CALM1	MAPT
CALM1	OPRM1
CALM1	SNTA1
CALM1	CAMK2G
CALM1	TCF4
CALM1	EDF1
CALM1	CSNK2A1
CALM1	CSNK2A2
CALM1	GRIN1
CALM1	TRPC3
CALM1	HTR2C
CALM1	NR3C1
CALM1	RELA
CALM1	CCNA2
CALM1	GRK5
CALM1	SYK
CALM1	OPTN
CALM1	RANBP2
CALM1	SET
CALM1	SQSTM1
CALM1	FKBP8
CALM1	SPP1
CALM1	DRD2
CALM1	MYC
CALM1	ERBB2
KIT	LYN
KIT	PIK3R1
KIT	PLCG1
KIT	PTPN11
KIT	PTPN6
KIT	PRKCA
KIT	SRC
KIT	STAT1
KIT	TEC
KIT	SOCS1
KIT	GRAP
KIT	MPDZ
KIT	RASA1
KIT	STAT5B
KIT	SOCS6
KIT	LCK
KIT	STYX
LYN	PLCG1
LYN	PECAM1
LYN	PTPN6
LYN	TYK2
LYN	SYK
LYN	SHC1
LYN	PTK2
LYN	MAPK3
LYN	KHDRBS1
LYN	BCAR1
LYN	TRAT1
LYN	GAB2
LYN	GAB3
LYN	EVL
LYN	DAPP1
LYN	MME
LYN	RASA1
LYN	TEC
LYN	TRIP10
LYN	PTPRC
LYN	SRC
LYN	RPS6KB1
LYN	PDE4D
LYN	STAT3
LYN	TRIM28
PIK3R1	NUP85
PIK3R1	PTPN11
PIK3R1	TYK2
PIK3R1	SRC
PIK3R1	TGFBR1
PIK3R1	TUBG1
PIK3R1	SH3KBP1
PIK3R1	WAS
PIK3R1	SYN1
PIK3R1	RRAS2
PIK3R1	TEK
PIK3R1	TIE1
PIK3R1	SHB
PIK3R1	TYRO3
PIK3R1	SLC9A2
PIK3R1	SHC1
PIK3R1	PTK2
PIK3R1	IRS2
PIK3R1	MAPK8
PIK3R1	RAC1
PIK3R1	TUBA1B
PIK3R1	ADAM12
PIK3R1	BCAR1
PIK3R1	IRS4
PIK3R1	SOCS1
PIK3R1	CD2AP
PIK3R1	HGS
PIK3R1	TOM1L1
PIK3R1	TRAT1
PIK3R1	YWHAG
PIK3R1	AGAP2
PIK3R1	VAV3
PIK3R1	GAB2
PIK3R1	PIK3AP1
PIK3R1	GAB3
PIK3R1	PPM1A
PIK3R1	WBP11
PIK3R1	PTPN6
PIK3R1	TUB
PIK3R1	RB1
PIK3R1	KHDRBS1
PIK3R1	WASF3
PIK3R1	TSHR
PIK3R1	TGFBR2
PIK3R1	TEC
PIK3R1	TLR2
PIK3R1	SOCS6
PIK3R1	SOCS7
PIK3R1	SYK
PIK3R1	EZR
PIK3R1	SSTR2
PIK3R1	PSMB5
PIK3R1	ARHGAP17
PIK3R1	RASA1
PIK3R1	PSEN1
PIK3R1	RET
PIK3R1	VAV1
PIK3R1	LAT
PIK3R1	HCST
PIK3R1	ADAMTS2
PIK3R1	TTR
PIK3R1	ITSN1
PIK3R1	ABI1
PIK3R1	DAB2IP
PIK3R1	CCL14
PIK3R1	ZDHHC17
PIK3R1	SQSTM1
PIK3R1	APPL1
PIK3R1	CLNK
PIK3R1	SH2D2A
PIK3R1	STAT3
PIK3R1	TNS4
PIK3R1	RASD2
PIK3R1	KBTBD2
PIK3R1	PROM1
PIK3R1	NYAP1
PIK3R1	NYAP2
PIK3R1	MYO16
PIK3R1	IKZF3
PIK3R1	LNX2
PIK3R1	LRRK2
PIK3R1	YWHAZ
PIK3R1	ENKUR
PIK3R1	BRD7
PIK3R1	PASK
PTPN11	TEK
PTPN11	TIE1
PTPN11	STAT1
PTPN11	SHC1
PTPN11	IRS2
PTPN11	PXN
PTPN11	IRS4
PTPN11	STAT5B
PTPN11	GAB2
PTPN11	FRS2
PTPN11	GAB3
PTPN11	STAT3
PTPN11	SOCS3
PTPN11	RET
PTPN11	CXCR4
PTPN11	SRC
PTPN11	SOS1
PTPN11	SELE
PTPN11	SYNCRIP
PTPN11	RPIA
PTPN6	TYK2
PTPN6	ZAP70
PTPN6	SSTR2
PTPN6	SRC
PTPN6	SYK
PTPN6	KHDRBS1
PTPN6	IRS4
PTPN6	STAT5B
PTPN6	BLNK
PTPN6	GAB2
PTPN6	IRS2
PTPN6	PTPN11
PTPN6	SHC1
PTPN6	VAV1
PTPN6	SOS1
PTPN6	PTPRC
PTPN6	CXCR4
PTPN6	LAT
PRKCA	SPP1
PRKCA	PTPN11
PRKCA	GNB2L1
PRKCA	SRC
PRKCA	TP53
PRKCA	SYK
PRKCA	YWHAZ
PRKCA	DGKZ
PRKCA	RAC1
PRKCA	CYTH2
PRKCA	YWHAG
PRKCA	EDF1
PRKCA	TRPC3
PRKCA	SDC4
PRKCA	PTPN6
PRKCA	SHC1
PRKCA	PICK1
PRKCA	EZR
PRKCA	RAF1
PRKCA	HIST1H3A
PRKCA	HIST3H3
SRC	GNB2L1
SRC	IKBKG
SRC	WAS
SRC	SYN1
SRC	SYK
SRC	TYRO3
SRC	STAT1
SRC	TUB
SRC	KHDRBS1
SRC	ADAM12
SRC	BCAR1
SRC	TRPC6
SRC	CD2AP
SRC	STAT5B
SRC	TRAT1
SRC	YWHAG
SRC	GAB2
SRC	GAB3
SRC	GIT1
SRC	EVL
SRC	DOK4
SRC	WBP11
SRC	STAT3
SRC	DAPP1
SRC	VIL1
SRC	DGKZ
SRC	TRAF1
SRC	FRS2
SRC	TRIP10
SRC	ARHGAP17
SRC	TP53
SRC	SH2D2A
SRC	PROM1
STAT1	TYK2
STAT1	GNB2L1
STAT1	STAT2
STAT1	RPS6KA5
STAT1	UBE2I
STAT1	PIAS1
STAT1	STAT3
STAT1	CXCR4
STAT1	STAT5B
STAT1	SYK
CRKL	KIT
CRKL	PIK3R1
CRKL	IFNAR1
CRKL	PDGFRA
CRKL	PTPN11
CRKL	TYK2
CRKL	SOS1
CRKL	GRB2
CRKL	WAS
CRKL	SYK
CRKL	SHC1
CRKL	PXN
CRKL	DOK1
CRKL	BCAR1
CRKL	DAB1
CRKL	IRS4
CRKL	GAB1
CRKL	BLNK
CRKL	GAB2
CRKL	INPP5D
CRKL	EVL
CRKL	KIDINS220
CRKL	LYN
CRKL	SOS2
CRKL	STAT5B
CRKL	EPOR
CRKL	IGF1R
CRKL	INSR
CRKL	ERBB2
CRKL	ERBB3
CRKL	ARHGEF5
CRKL	KHDRBS1
CRKL	EGFR
CRKL	SOCS1
DOK1	KIT
DOK1	PTPN6
DOK1	NCK1
DOK1	INPP5D
DOK1	FYN
DOK1	HCK
DOK1	LYN
DOK1	PLCG1
DOK1	FES
DOK1	SRC
DOK1	SHC1
DOK1	TEC
DOK1	RASA1
DOK1	INSR
DOK1	LCK
DOK1	RET
DOK1	PIK3R1
DOK1	ITK
DOK1	VAV1
DOK1	ERBB2
DOK1	EGFR
GRAP	LAT
LCK	STAT3
LCK	PTK2
LCK	SH3BP2
LCK	LAT
LCK	GRAP
LCK	GAB2
LCK	EZR
LCK	ARHGAP17
LCK	RASA1
LCK	PTPRC
LCK	NFKBIA
LCK	RAF1
LCK	VAV1
LCK	PIK3R1
LCK	PIK3CA
LCK	PLCG1
LCK	PECAM1
LCK	PTPN11
LCK	PTPN6
LCK	ZAP70
LCK	MAPK1
LCK	PRKCA
LCK	SYK
LCK	STAT1
LCK	SHC1
LCK	TUB
LCK	SQSTM1
LCK	LCP2
LCK	PRKACA
LCK	MAPK3
LCK	PLD2
LCK	KHDRBS1
LCK	PXN
LCK	BCAR1
LCK	SH2D2A
LCK	TRAT1
LCK	DAPP1
LCK	IKBKG
LCK	SOS1
LCK	SMAD3
LCK	WAS
LCK	UBC
WAS	TRIP10
WAS	EVL
WAS	TCERG1
WAS	PRPF40A
PTK2	PTPN11
PTK2	RET
PTK2	SRC
PTK2	SYK
PTK2	STAT1
PTK2	SHC1
PTK2	PXN
PTK2	BCAR1
PTK2	GIT1
PTK2	PIAS1
PTK2	CXCR4
PTK2	EZR
PTK2	TP53
PTK2	SELE
PTK2	RAC1
PTK2	BBS10
PTK2	NACAD
PTK2	ZNF331
PTK2	SOCS3
PTK2	DOK4
PTK2	PTPN6
PTK2	SH2D2A
PTK2	SOCS1
INPP5D	LYN
INPP5D	PECAM1
INPP5D	PTPN11
INPP5D	SHC1
INPP5D	MET
INPP5D	JAK1
INPP5D	KIT
INPP5D	PLCG1
INPP5D	JAK3
INPP5D	GAB2
INPP5D	SH3KBP1
INPP5D	ZDHHC17
NFATC1	PRKCA
NFATC1	GNB2L1
NFATC1	KAT2B
NFATC1	TUBA1A
NFATC1	UBE2I
NFATC1	PIAS1
ABL1	JUN
ABL1	CBL
ABL1	PTPN6
ABL1	ZAP70
ABL1	RB1
ABL1	GRB2
ABL1	SRC
ABL1	TP53
ABL1	NTRK1
ABL1	BTK
ABL1	NCK1
ABL1	SLC9A2
ABL1	EPHB2
ABL1	TUB
ABL1	SOS2
ABL1	CRKL
ABL1	SH3BP2
ABL1	PXN
ABL1	GRIN2D
ABL1	DOK1
ABL1	BCAR1
ABL1	RAD9A
ABL1	ATM
ABL1	EVL
ABL1	ABI1
ABL1	CDK1
ABL1	BRCA1
ABL1	PIK3R1
ABL1	PLCG1
ABL1	RASA1
ABL1	ACTA1
ABL1	KIT
ABL1	PRKD1
ABL1	CDK5
ABL1	MAPT
ABL1	YWHAZ
ABL1	YWHAG
ABL1	EP300
ABL1	ARHGAP17
ABL1	HCK
ABL1	JAK1
ABL1	JAK2
ABL1	BCR
ABL1	XRCC6
ABL1	APP
ABL1	CD19
ABL1	CRK
ABL1	MDM2
ABL1	VAV1
ABL1	SPTAN1
ABL1	NCOA3
ABL1	NFKBIA
ABL1	PARK2
ABL1	BAG1
ABL1	HSPA8
ABL1	NEDD4L
ABL1	PDE4D
ABL1	EGFR
ABL1	ERBB2
ABL1	ERBB3
ABL1	UBC
ABL1	GTF2F1
ABL1	SHB
ABL1	PDGFRB
OPTN	MAP1LC3A
OPTN	PIAS4
OPTN	ZDHHC17
OPTN	LNX2
FLT1	KDR
FLT1	SHC1
FLT1	PTPN11
FLT1	NCK1
FLT1	PLCG1
FLT1	GRB2
FLT1	FYN
FLT1	STAT1
FLT1	STAT3
FLT1	PTK2
FLT1	SHC2
KDR	SHB
KDR	SHC1
KDR	SRC
KDR	RASA1
KDR	PTPN6
KDR	PTPN11
KDR	NCK1
KDR	SH2D2A
KDR	STAT1
KDR	PLCG1
KDR	FRS2
KDR	SHC2
KDR	PPM1A
KDR	STYX
KDR	MAPK1
SHC1	ZAP70
SHC1	SP1
SHC1	SRC
SHC1	SYK
SHC1	IRS2
SHC1	VAV3
SHC1	GAB2
SHC1	TPR
SHC1	TEK
SHC1	SOS1
SHC1	TEC
SHC1	SOS2
SHC1	STAT5B
SHC1	GRAP
SHC1	VAV1
RRAS	SOS1
SOS1	ZAP70
SOS1	SH3KBP1
SOS1	ABI1
SOS1	CD2AP
SOS1	GRAP
SOS1	PACSIN1
SOS1	FRS2
SOS1	RANBP9
SOS1	LAT2
SOS1	SPTAN1
ARAF	RRAS
ARAF	PIK3R1
ARAF	HRAS
ARAF	RRAS2
ARAF	YWHAG
ARAF	KLHL12
ARAF	PDGFRB
ARAF	RGS12
ARAF	YWHAZ
ARAF	BAD
ARAF	KRAS
ARAF	AGTRAP
ARAF	BECN1
ARAF	EPHA2
ARAF	MYC
ARAF	FGFR4
ARAF	TP53
ARAF	PIK3CA
NCK1	RRAS
NCK1	PDGFRB
NCK1	SOS1
NCK1	WAS
NCK1	NTRK2
NCK1	RAC1
NCK1	KHDRBS1
NCK1	PXN
NCK1	PKN2
NCK1	PAK1
NCK1	BCAR1
NCK1	ABI1
NCK1	SOCS1
NCK1	BLNK
NCK1	SOCS7
NCK1	RHOU
NCK1	PLCG1
NCK1	FRS2
NCK1	RASA1
NCK1	PTK2
NCK1	GAB2
NCK1	PFN1
EPHB2	RRAS
EPHB2	SRC
EPHB2	NCK1
EPHB2	ITSN1
EPHB2	GRIN1
EPHB2	GRIN2B
EPHB2	GRB2
EPHB2	PTK2
EPHB2	SDCBP
EPHB2	PICK1
EPHB2	RASA1
EPHB2	MLLT4
EPHB2	FOS
EPHB2	PLCG1
EPHB2	MTMR14
CASP3	LYN
CASP3	RB1
CASP3	SP1
CASP3	TGM2
CASP3	BCAP31
CASP3	SREBF2
CASP3	TRAF1
CASP3	CASP8
CASP3	PXN
CASP3	PKN2
CASP3	BCAR1
CASP3	PICALM
CASP3	USO1
CASP3	GRIPAP1
CASP3	VAV1
CASP3	PPP3CA
CASP3	CTNNB1
CASP3	CDC42
CASP3	MET
CASP3	SPTAN1
CASP3	RAC1
CASP3	GZMB
CASP3	CASP6
CASP3	MDM2
CASP3	NMT2
CASP3	HIP1
CASP3	FYN
CASP3	GSN
CASP3	RASA1
CASP3	HTT
CASP3	PSEN1
CASP3	MAPT
CASP3	HMGB1
CASP3	MAPK8
CASP3	YWHAG
CASP3	STAT1
CASP3	BECN1
MAPK3	RET
MAPK3	SP1
MAPK3	TP53
MAPK3	RPS6KA3
MAPK3	SREBF2
MAPK3	UBTF
MAPK3	RPS6KA1
MAPK3	GAB2
MAPK3	DUSP10
MAPK3	STAT3
MAPK3	RAF1
MAPK3	MAPK8
MAPK3	PTPN11
MAPK3	SYN1
MAPK3	SYK
MAPK3	PXN
MAPK3	RPS6KB1
MAPK3	RXRA
MAPK3	NUPL1
MAPK3	RPS6KA6
MAPK3	FOXP2
MAPK3	FRS2
MAPK3	SOS1
KHDRBS1	GRAP
KHDRBS1	OSTF1
KHDRBS1	SH3KBP1
KHDRBS1	CD2AP
KHDRBS1	PACSIN1
KHDRBS1	POT1
BCAR1	CD2AP
BCAR1	SH3KBP1
GAB2	LAT
GAB2	GRAP
EVL	PRPF40A
GRB2	RASA1
GRB2	HTT
GRB2	IL2RB
GRB2	IRS1
GRB2	JAK1
GRB2	JAK2
GRB2	PTPRC
GRB2	MAP2
GRB2	NGFR
GRB2	RET
GRB2	MET
GRB2	KIT
GRB2	PIK3R1
GRB2	PLCG1
GRB2	PDGFRB
GRB2	PRNP
GRB2	PTPN11
GRB2	PTPN6
GRB2	PTPN1
GRB2	MAPK1
GRB2	SOS1
GRB2	ITK
GRB2	HRAS
GRB2	SRC
GRB2	KDR
GRB2	NTRK1
GRB2	WAS
GRB2	SYN1
GRB2	SYK
GRB2	MST1R
GRB2	TEK
GRB2	SHB
GRB2	SHC1
GRB2	PTK2
GRB2	SNTA1
GRB2	TUB
GRB2	SOS2
GRB2	LCP2
GRB2	SH3BP2
GRB2	LAT
GRB2	KHDRBS1
GRB2	ADAM12
GRB2	BCAR1
GRB2	IRS4
GRB2	SOCS1
GRB2	CD2AP
GRB2	BLNK
GRB2	TOM1L1
GRB2	VAV3
GRB2	GAB2
GRB2	FRS2
GRB2	GAB3
GRB2	INPP5D
GRB2	LAT2
GRB2	SOCS7
GRB2	IRS2
GRB2	RHOU
GRB2	PAK1
GRB2	NPM1
GRB2	ZAP70
GRB2	RPS6KA1
GRB2	VAV1
GRB2	SH3KBP1
GRB2	SHC2
GRB2	ARHGAP17
GRB2	PXN
GRB2	TRAT1
GRB2	SYNCRIP
GRB2	MAP3K1
GRB2	HSPA5
GRB2	MAP1A
GRB2	MYH9
GRB2	UBC
GRB2	TCERG1
GRB2	CUTA
GRB2	PPP3CA
GRB2	GIT1
GRB2	PDE4D
GRB2	PON2
GRB2	ARHGEF5
GRB2	WBP11
GRB2	PIK3AP1
GRB2	REL
GRB2	TP53BP2
GRB2	IKZF3
GRB2	DPPA4
GRB2	CRBN
GRB2	PPARA
GRB2	RB1
GRB2	SOCS4
GRB2	VCP
GRB2	CLNK
GRB2	LNX2
JUN	RB1
JUN	SP1
JUN	TAF1
JUN	TBP
JUN	STAT1
JUN	PIN1
JUN	MAPK8
JUN	MAPK3
JUN	SUMO1
JUN	NCOA3
JUN	NCOA1
JUN	SMAD3
JUN	PRKD1
JUN	COPS5
JUN	UBE2I
JUN	PIAS1
JUN	STAT3
JUN	MAPK11
JUN	NCOA2
JUN	ITCH
JUN	NTRK3
JUN	TCF4
JUN	RELA
JUN	VAV1
JUN	PML
JUN	NCOR2
JUN	UBC
JUN	EDF1
JUN	MAPK1
JUN	TRAF2
JUN	MAP3K1
JUN	NFATC2
JUN	TAF4
JUN	MDM2
JUN	PPP3CA
JUN	PPARG
JUN	DNMT3L
RB1	GNB2L1
RB1	SP1
RB1	TGM2
RB1	TAF1
RB1	UBTF
RB1	TBP
RB1	DGKZ
RB1	STAT3
RB1	KAT2B
RB1	CHEK2
RB1	UBE2I
RB1	CLNK
RB1	TP53
CD5	CSNK2A1
CD5	FYN
CD5	RASA1
CD5	LCK
CD5	PIK3R1
CD5	PTPN6
CD5	ZAP70
CD5	PRKCA
TAF1	TBP
TAF1	SUB1
TAF1	UBTF
TAF1	HIST3H3
TAF1	TAF2
TAF1	TAF7
TAF1	TAF15
TAF1	EDF1
TAF1	TAF4
TAF1	TAF6
TAF1	TAF5
TAF1	TAF10
TAF1	TAF11
TAF1	TAF12
TAF1	TAF9
TAF1	ASF1A
TAF1	ASF1B
TAF1	TAF8
TAF1	GFI1B
TAF1	BRMS1
TAF1	TAF7L
TAF1	HIST1H4A
TAF1	HIST1H3A
TAF1	TP53
TAF1	TAF4B
TAF1	UBE2I
AR	JUN
AR	CCND1
AR	GNB2L1
AR	RB1
AR	GTF2F1
AR	GTF2H1
AR	FLNA
AR	CREBBP
AR	NCOR1
AR	BAG1
AR	SUMO1
AR	NCOA3
AR	NCOA1
AR	SMAD3
AR	RANBP9
AR	MED1
AR	PIAS4
AR	UBE2I
AR	NCOA2
AR	PIAS1
AR	BRCA1
AR	CTNNB1
AR	STAT3
AR	CASP1
AR	CDK1
AR	EGFR
AR	MAPK1
AR	SP1
AR	CASP3
AR	NCOR2
AR	PXN
AR	RAD9A
AR	XRCC6
AR	KAT2B
AR	EP300
AR	DDC
AR	CASP8
AR	HIF1A
AR	SRC
AR	GRIP1
AR	TCF4
AR	CALM1
AR	ESR1
AR	GSN
AR	NR3C1
AR	GAPDH
AR	HSP90AA1
AR	HMGB1
AR	NFKB1
AR	RELA
AR	RAF1
AR	MDM2
AR	CEBPB
AR	TBP
AR	GADD45GIP1
AR	VHL
AR	REL
AR	VCP
AR	TAF1
AR	ZNF451
CREBBP	JUN
CREBBP	RXRG
CREBBP	TP53
CREBBP	RPS6KA3
CREBBP	SREBF2
CREBBP	NFATC2
CREBBP	STAT1
CREBBP	STAT2
CREBBP	MYBL2
CREBBP	RPS6KA1
CREBBP	NCOA3
CREBBP	KHDRBS1
CREBBP	NCOA1
CREBBP	EP300
CREBBP	HIF1A
CREBBP	WT1
CREBBP	KAT2B
CREBBP	PML
CREBBP	CSNK2A1
CREBBP	CSNK2A2
CREBBP	CTNNB1
CREBBP	STAT3
CREBBP	RPS6KA5
CREBBP	CTBP1
CREBBP	SMAD3
CREBBP	RELA
CREBBP	FGFR1
CREBBP	TRIP10
CREBBP	MYC
CREBBP	HSF1
CREBBP	MDM2
CREBBP	IKBKG
CREBBP	PIAS1
CREBBP	NCOA2
CREBBP	UBTF
CREBBP	EGR1
CREBBP	ESR1
CREBBP	EWSR1
CREBBP	NR3C1
CREBBP	HOXA9
CREBBP	MSX1
CREBBP	HTT
CREBBP	XRCC6
CREBBP	FOS
CREBBP	PPARG
CREBBP	HIST3H3
CREBBP	REL
CREBBP	HIST1H3A
CREBBP	HIST1H4A
CREBBP	HMGB1
CREBBP	LYN
CREBBP	HCK
CREBBP	SRC
CREBBP	IKBKB
CREBBP	UBE2I
CREBBP	MAPK3
CREBBP	MAPK1
CREBBP	SUMO1
PIN1	PTPN1
PIN1	TP53
PIN1	PKMYT1
PIN1	UBQLN4
PIN1	RAF1
PIN1	NCOA3
PIN1	TRAF2
PIN1	SOCS3
PIN1	GGA2
PIN1	RELA
PIN1	RPS6KB1
PIN1	PML
PIN1	BCLAF1
PIN1	MED1
PIN1	TCF4
PIN1	TRAF1
PIN1	IKZF3
PIN1	FOXP2
PIN1	KRTAP10-1
PIN1	PPARG
PIN1	CPEB1
SUMO1	NCOA1
SUMO1	PIAS1
SUMO1	NCOA2
SUMO1	NCOA3
SUMO1	NCOR2
SUMO1	PIAS4
SUMO1	HGS
SUMO1	ZNF451
SUMO1	IKZF3
NCOA3	IKBKG
NCOA3	NCOR2
NCOA3	KAT2B
NCOA3	HIST3H3
NCOA3	NCOR1
NCOA1	KAT2B
NCOA1	COPS5
NCOA1	NCOR1
EP300	JUN
EP300	PPARA
EP300	SREBF2
EP300	NFATC2
EP300	SUB1
EP300	MYBL2
EP300	NCOA3
EP300	NCOA1
EP300	HIF1A
EP300	KAT2B
EP300	UBE2I
EP300	ING5
EP300	RPS6KA5
EP300	STAT3
EP300	PML
EP300	SMAD3
EP300	STAT1
EP300	STAT5B
EP300	NCOA2
EP300	MYC
EP300	NFATC1
EP300	ETV4
EP300	RB1
EP300	SP1
EP300	SET
EP300	TP53
EP300	TCF4
EP300	ESR1
EP300	NR4A1
EP300	RELA
EP300	MDM2
EP300	PPARG
EP300	STAT2
EP300	HIST3H3
EP300	REL
EP300	MAX
EP300	GRB2
EP300	HIST1H3A
EP300	HIST1H4A
EP300	NPM1
EP300	GRIP1
EP300	NFKB1
EP300	JUNB
EP300	XRCC6
EP300	MAPK1
EP300	MAPT
EP300	RPS6KB1
EP300	FOS
EP300	PIN1
EP300	HIST1H1A
EP300	EWSR1
EP300	TRAF2
EP300	UBQLN1
EP300	PRKCA
EP300	BRMS1
EP300	UBC
EP300	MAPK8
EP300	YWHAZ
EP300	GLUL
EP300	PIAS1
EP300	HMGB1
EP300	UBTF
SMAD3	MYC
SMAD3	TGFBR1
SMAD3	SREBF2
SMAD3	MAPK8
SMAD3	MAPK1
SMAD3	PML
SMAD3	RASD2
SMAD3	RRAS2
SMAD3	SQSTM1
SMAD3	TGFBR2
SMAD3	RBL1
SMAD3	PRKAR2A
SMAD3	SP1
SMAD3	TP53
SMAD3	HGS
SMAD3	KAT2B
SMAD3	TPM3
SMAD3	PIAS4
SMAD3	PPM1A
SMAD3	MAX
SMAD3	MBD1
SMAD3	RANBP9
SMAD3	TGM2
SMAD3	HEYL
SMAD3	PIN1
SMAD3	ITCH
SMAD3	SIN3A
SMAD3	SH2D2A
SMAD3	PIK3CA
SMAD3	SETD2
SMAD3	UBQLN4
SMAD3	RELA
SMAD3	DNAJB4
SMAD3	NEDD4L
SMAD3	DNMT3L
HIF1A	JUN
HIF1A	TP53
HIF1A	VHL
HIF1A	MAPK3
HIF1A	NCOA1
HIF1A	COPS5
HIF1A	NCOA2
HIF1A	SP1
HIF1A	MAX
HIF1A	STAT3
HIF1A	NR4A1
HIF1A	HSP90AA1
HIF1A	MDM2
HIF1A	GNB2L1
HIF1A	SMAD3
HIF1A	HSP90AB1
HIF1A	RB1
HIF1A	MAPK1
HIF1A	UBE2I
HIF1A	PLD2
HIF1A	LRRK2
HIF1A	IKBKG
HIF1A	KAT2B
HIF1A	PRKACA
HIF1A	MYC
HIF1A	SUMO1
HIF1A	PARK2
PRKD1	SRC
PRKD1	MAPK8
PRKD1	KIDINS220
PRKD1	GNB2L1
PRKD1	SYK
PRKD1	YWHAZ
PRKD1	COPS5
PRKD1	TP53
COPS5	BCL2L14
CTSG	CXCL12
CTSG	PPBP
CTSG	CXCR4
UBE2I	WT1
UBE2I	PIAS1
UBE2I	HGS
UBE2I	IKZF3
UBE2I	ZNF451
UBE2I	SUMO1
UBE2I	PRPF40A
UBE2I	LNX2
UBE2I	NCOR1
UBE2I	NCOR2
UBE2I	HIST1H4A
UBE2I	EDF1
UBE2I	RPS6KA6
UBE2I	GRIP1
UBE2I	SOCS6
UBE2I	PIAS4
UBE2I	TRIM28
UBE2I	KLHL12
UBE2I	SH3KBP1
UBE2I	CD2AP
UBE2I	SYMPK
UBE2I	TCERG1
UBE2I	AGTRAP
UBE2I	VHL
PIAS1	PIAS4
PIAS1	PRPF40A
PIAS1	NCOR1
PIAS1	ZNF451
MAPK14	JUNB
MAPK14	MAPK1
MAPK14	RET
MAPK14	GRB2
MAPK14	FLNA
MAPK14	MAPK3
MAPK14	SMAD3
MAPK14	DUSP10
MAPK14	PML
MAPK14	CSNK2A2
MAPK14	MAX
MAPK14	NCOA3
MAPK14	STAT1
MAPK14	MAPK8
MAPK14	NFATC1
MAPK14	FKBP8
MAPK14	SHC1
MAPK14	IRAK1
MAPK14	ESR1
MAPK14	EGFR
MAPK14	CSNK2A1
MAPK14	RPS6KA5
MAPK14	TFCP2
MAPK14	COPS5
MAPK14	EEF1A1
MAPK14	RELA
MAPK14	MAPK11
MAPK14	KAT2B
MAPK14	EP300
MAPK14	TP53
MAPK14	RB1
MAPK14	SQSTM1
MAPK14	MAP3K10
MAPK14	JUN
MAPK14	EPHA2
MAPK14	FGFR4
MAPK14	MYC
JUNB	MAPK8
JUNB	SMAD3
JUNB	SET
JUNB	MAP2
JUNB	TCERG1
JUNB	DNMT3L
JUNB	ITCH
CEBPB	MAPK1
CEBPB	RB1
CEBPB	SP1
CEBPB	MYC
CEBPB	RPS6KA1
CEBPB	TRIM28
CEBPB	EP300
CEBPB	SMAD3
CEBPB	TAF9
CEBPB	MAPK3
CEBPB	RPS6KA5
CEBPB	CREBBP
CEBPB	EGR1
CEBPB	EGFR
CEBPB	ESR1
CEBPB	NR3C1
CEBPB	HSF1
CEBPB	HMGB1
CEBPB	NFKB1
CEBPB	RELA
CEBPB	NCOR2
CEBPB	PPARG
CEBPB	KAT2B
FGFR2	PLCG1
FGFR2	PPM1A
FGFR2	PTPN6
FGFR2	PTPN11
FGFR2	SHC1
OPRD1	PRKCA
OPRD1	PRKCE
OPRD1	OPRM1
OPRD1	GPRASP1
PRKCE	MAPK1
PRKCE	GNB2L1
PRKCE	SRC
PRKCE	GNA13
PRKCE	PRKD1
PRKCE	MAPK3
PRKCE	RAF1
OPRM1	GPRASP1
OPRM1	PLD2
OPRM1	DNAJB4
OPRM1	PPL
OPRM1	UBC
OPRM1	COPS5
OPRM1	DOK4
OPRM1	DOK5
OPRM1	RANBP9
OPRM1	SIAH1
OPRM1	SIAH2
OPRM1	VAPA
OPRM1	WLS
OPRM1	ZYX
ELANE	CXCR4
ELANE	CXCL12
CTBP1	RB1
CTBP1	CTBP2
CTBP1	SIN3A
CTBP1	FOXP1
CTBP1	EP300
CTBP1	KAT2B
CTBP1	HTT
CTBP1	MDM2
CTBP1	TBP
CTBP1	FOXP2
CTBP1	TCF4
CTBP1	HIST3H3
CTBP2	EP300
CTBP2	MDM2
CTBP2	HIST3H3
CTBP2	UBC
CTBP2	XRCC6
CTBP2	UBE2I
CTBP2	FOXP2
KAT2B	TRIM14
ZAP70	LAT
ZAP70	GAB2
ZAP70	TUBB
ZAP70	TUBA1A
ZAP70	LRRK2
ITK	PLCG1
ITK	WAS
ITK	LCP2
ITK	LAT
ITK	KHDRBS1
ITK	SOCS1
ITK	SH2D2A
ITK	BLNK
ITK	TGFBR1
ITK	LCK
ITK	SRC
ITK	IKBKG
BLK	CBL
BLK	FCGR2A
BLK	EGFR
BLK	ERBB2
BLK	STAT3
SH3KBP1	SH3GLB1
PSMA3	GFI1B
PSMA3	PSMB5
PSMA3	IKBKG
PSMA3	SF1
PSMA3	SH3KBP1
RHOA	PLCG1
RHOA	PRKCA
RHOA	TGM2
RHOA	FLNA
RHOA	PRKACA
RHOA	PKN2
RHOA	ARHGAP1
RHOA	RABAC1
RHOA	VAV3
RHOA	TRPC1
RHOA	RASGRF1
RHOA	TGFBR1
RHOA	VAV1
RHOA	HSPA1A
RHOA	ITPR1
RHOA	BCR
RHOA	MAP3K1
RHOA	GNB2L1
RHOA	IKBKG
RHOA	IKZF3
RHOA	AGAP2
RHOA	KRAS
TGM2	TUBB
FLNA	VHL
FLNA	TRAF2
FLNA	RAC1
FLNA	YWHAG
FLNA	OPRM1
FLNA	PRKCA
FLNA	PAK1
FLNA	MTNR1A
FLNA	MTNR1B
FLNA	SELE
FLNA	PSEN1
FLNA	SMAD3
FLNA	SRC
FLNA	HNRNPD
FLNA	REL
FLNA	TCF4
FLNA	KLHL12
FLNA	NLGN3
PRKACA	NUP85
PRKACA	SRC
PRKACA	SYN1
PRKACA	VASP
PRKACA	CACNG2
PRKACA	PPP1R9B
PRKACA	PPP1R1B
PRKACA	GNA13
PRKACA	WT1
PRKACA	RASGRF1
PRKACA	NDRG1
PRKACA	PSEN1
PRKACA	RELA
PRKACA	RAF1
PRKACA	TRIP10
PRKACA	RANBP9
PRKACA	ITCH
PRKACA	YWHAZ
ARHGAP1	PIK3R1
ARHGAP1	SRC
ARHGAP1	TUBA4A
ARHGAP1	WAS
ARHGAP1	EPB41L1
ARHGAP1	BNIP2
ARHGAP1	HSP90AB1
ARHGAP1	BNIPL
ARHGAP1	PTPN11
ARHGAP1	CDC42
ARHGAP1	RASA1
ARHGAP1	ITPR1
ARHGAP1	RAC1
ARHGAP1	CHEK2
ARHGAP1	AGTRAP
ARHGAP1	MTNR1B
RABAC1	RRAS2
RABAC1	RASD2
CTSS	PLCG1
TRPC1	TRPC5
TRPC1	TRPC4
TRPC1	HOMER1
TRPC1	TRPC3
SPP1	UBQLN4
SPP1	COPS5
SPP1	RANBP9
SPP1	TUBB
SPP1	GRIPAP1
SPP1	KCNIP1
FEZ1	KIAA1377
FEZ1	TOMM20
WT1	KRTAP10-1
WT1	KRTAP10-5
SIAH1	TUBA4A
SIAH1	TUBA1A
SIAH1	TUBA1B
SIAH1	UBE2E3
SIAH1	VAV1
SIAH1	PIAS1
SIAH1	UBE2I
SIAH1	STAT3
SIAH1	TP53BP2
SIAH1	DNALI1
SIAH1	SIAH2
CCND1	RB1
CCND1	SP1
CCND1	TAF1
CCND1	MYBL2
CCND1	PRKACA
CCND1	NCOA3
CCND1	NCOA1
CCND1	EP300
CCND1	KAT2B
CCND1	BRCA1
CCND1	CALM1
CCND1	CTNNB1
CCND1	STAT3
CCND1	RBL1
CCND1	ESR1
CCND1	RBL2
CCND1	CDKN2A
CCND1	MAPK11
CCND1	CDK2
CCND1	UBTF
CCND1	RANBP9
CCND1	PARK2
MYBL2	NCOR2
MYBL2	NCOR1
MYBL2	RBL1
MYBL2	CXCR4
PPARA	MAPK1
PPARA	RXRA
PPARA	NCOR2
PPARA	NCOR1
PPARA	MAPK3
PPARA	NCOA1
PPARA	MED1
PPARA	RXRG
PPARA	PRKCA
PPARA	RELA
PPARA	UBE2I
PPARA	NCOA2
PPARA	NCOA3
RXRA	SP1
RXRA	TBP
RXRA	NCOR2
RXRA	NCOA3
RXRA	NCOA1
RXRA	ZNHIT3
RXRA	TRIP10
RXRA	NCOA2
RXRA	EDF1
RXRA	TAF11
RXRA	UBQLN4
RXRA	SRC
RXRA	GRIP1
RXRA	NCOR1
RXRA	RPS6KA6
RXRA	SMN1
RXRA	STAT1
RXRA	UBE2I
RXRA	DNMT3L
NCOR2	SIN3A
NCOR2	FOXP1
NCOR2	RANBP9
NCOR1	HEY2
NCOR1	SIN3A
NCOR1	NCOR2
NCOR1	TRIM14
MED1	RXRA
MED1	TP53
ACTN4	PTPN11
ACTN4	CAMK2G
ACTN4	ACTN3
ACTN4	PTPN6
ACTN4	ADORA2A
ACTN4	GSN
ACTN4	STAT1
ACTN4	ESR1
ACTN4	HGS
[truncated: 4,275 more rows]

## Sheet: Matrix-PPIs
Protein 1	Protein 2
PAK1	MAP2K1
PAK1	CDK5R1
PAK1	MAPK1
PAK1	SYN1
PAK1	PRKCD
PAK1	YWHAZ
DLG4	PRKCA
DLG4	HTR2A
DLG4	MAP1A
DLG4	TANC1
DLG4	EFNB2
DLG4	GRIK2
DLG4	CACNG2
DLG4	GRIN2A
DLG4	SRC
DLG4	FYN
PICK1	GRIP1
MAPK1	MAP2K1
MAPK1	RB1
MAPK1	TP53
MAPK1	RPS6KA3
MAPK1	TH
MAPK1	SNCA
MAPK1	YBX3
MAPK1	MAPKAPK2
HRAS	MAP2K1
HRAS	SRC
HRAS	DGKZ
HRAS	RASGRP1
HRAS	PRKCZ
PRKCA	PRKCZ
PRKCA	SRC
PRKCA	TP53
PRKCA	YWHAZ
PRKCA	DGKZ
PRKCA	HAND1
PRKCA	STXBP1
PRKCA	TRPV6
PRKCA	PICK1
PRKCA	EZR
SRC	IKBKG
SRC	SYN1
SRC	YWHAB
SRC	DGKZ
SRC	CDC37
SRC	STUB1
SRC	TP53
SRC	SRPK2
ABL1	RB1
ABL1	SRC
ABL1	TP53
ABL1	WASF1
ABL1	NEDD9
ABL1	CABLES2
ABL1	CABLES1
ABL1	CDK5
ABL1	MAPT
ABL1	CDKN1B
ABL1	YWHAZ
ABL1	YWHAB
ABL1	JAK2
ABL1	APP
ABL1	PARK2
ABL1	NEDD4
ABL1	NEDD4L
ABL1	ERBB3
ABL1	SRPK2
ABL1	CCND2
ABL1	STUB1
ABL1	MBP
ABL1	CDKN1A
GNAI3	CXCR2
GNAI3	MTNR1B
PRKCD	PRKCZ
PRKCD	YWHAB
PRKCD	MAPK3
PRKCD	MAPK1
PRKCD	SRC
PRKCD	YWHAZ
PRKCD	SQSTM1
MAPK3	MAP2K1
MAPK3	TP53
MAPK3	TH
MAPK3	RPS6KA3
MAPK3	RAB4A
MAPK3	SYN1
MAPK3	MAPKAPK2
MAPK3	HTRA2
NEDD9	FZR1
RB1	DGKZ
RB1	TP53
CREBBP	PRKCD
CREBBP	TP53
CREBBP	RPS6KA3
CREBBP	HIF1A
CREBBP	CSNK2A1
CREBBP	CTNNB1
CREBBP	RPS6KA5
CREBBP	FGFR1
CREBBP	GAK
CREBBP	IKBKG
CREBBP	PAX5
CREBBP	EBF1
CREBBP	PPARG
CREBBP	MAPK10
CREBBP	SRC
CREBBP	UBE2D1
CREBBP	MAPK3
CREBBP	MAPK1
CREBBP	PCNA
HIF1A	TP53
HIF1A	MAPK3
HIF1A	STUB1
HIF1A	UBE2D1
HIF1A	RB1
HIF1A	MAPK1
HIF1A	IKBKG
HIF1A	PRKACA
HIF1A	FZR1
HIF1A	PARK2
FGFR2	NEDD4
PRKCE	MAPK1
PRKCE	SRC
PRKCE	MAPK3
PRKCE	SNCA
PRKACA	SRC
PRKACA	SYN1
PRKACA	HAND1
PRKACA	CACNG2
PRKACA	PPP1R1B
PRKACA	TH
PRKACA	PSEN1
PRKACA	RANBP9
PRKACA	YWHAZ
TRPC1	HOMER1
PAX5	RB1
PAX5	MAPK1
CDKN1B	YWHAB
CDKN1B	SRC
CDKN1B	YWHAZ
CDKN1B	HIST1H1B
CDKN1B	JAK2
CDKN1B	MAPK10
GSK3B	PRKCB
GSK3B	TP53
GSK3B	PRKACA
GSK3B	PPP1R2
GSK3B	PRKCZ
GSK3B	IKBKG
GSK3B	PSEN1
GSK3B	MAPT
GSK3B	PRKCA
GSK3B	YBX3
GSK3B	BAG6
GSK3B	UBE2D1
GSK3B	SNCA
GSK3B	MAPK1
YWHAZ	MAPKAPK2
YWHAZ	NEDD4L
YWHAZ	SQSTM1
CAMK2A	DLG1
CAMK2A	CDK5R1
CAMK2A	CDK5R2
CAMK2A	CHAT
CAMK2A	TANC1
CAMK2A	GRIN2A
CAMK2A	MAPT
CAMK2A	YWHAB
CAMK2A	SQSTM1
ERBB3	JAK2
ERBB3	FGFR1
ERBB3	SRC
ERBB3	TNS3
ERBB3	NEDD4
ERBB3	SRPK2
ERBB3	PRKACA
GNAQ	HTR2A
ACTN1	GRIA4
ACTN1	CDK5
ACTN1	GRIN2A
ACTN1	CDK5R1
ACTN1	CDK5R2
ACTN1	CAMK2A
ACTN1	SRC
ACTN1	PSEN1
ACTN1	MTNR1B
NTRK3	MAPK1
NTRK3	SQSTM1
NTRK3	MAPK3
DGKZ	RASGRP1
DAB1	SRC
DAB1	ERBB3
CANX	GRIA1
CANX	MTNR1B
CANX	CSNK2A1
TP53	YWHAZ
TP53	CABLES2
TP53	CABLES1
TP53	STUB1
TP53	SQSTM1
TP53	FZR1
TP53	RANBP9
TP53	DGKZ
PTPN2	SRC
ACHE	APP
ACHE	COL4A1
ACHE	LAMB1
ACHE	LAMA1
ACHE	LGTN
ACHE	HAND1
ACHE	COLQ
ACHE	PRIMA1
RPS3A	SOD2
DNM1	PRKCA
DNM1	SRC
WASF1	MAPKAPK2
HSPA5	YWHAB
HSPA5	MTNR1B
HSPA5	SQSTM1
HSPA1A	PRKCA
HSPA1A	TP53
HSPA1A	IKBKG
HSPA1A	YWHAZ
HSPA1A	YWHAB
HSPA1A	DNAJB1
HSPA1A	STUB1
HSPA1A	PARK2
HSPA1A	SNCA
HSPA1A	MAPT
ING1	PCNA
ING1	TP53
ING1	YWHAB
ING1	YWHAZ
CASP8	GRIA1
CASP8	CDKN1B
CASP8	CTNNB1
CASP8	FYN
CASP8	IKBKG
CASP8	PARK2
CASP8	CDK11B
CASP8	RB1
CASP8	PRKCZ
CASP8	MAPK3
CASP8	MAPK1
CASP8	PSEN1
CASP8	MAPT
PRKCB	STXBP1
PRKCB	RB1
PRKCB	IKBKG
MAPT	STUB1
MAPT	PSEN1
MAPT	SNCA
MAPT	PRKCD
MAPT	RPS6KA3
MAPT	PPP5C
MAPT	YWHAZ
MAPT	YWHAB
MAPT	STXBP1
MAPT	PRKACA
MAPT	RPS6KA5
MAPT	SRC
MAPT	CDK5R1
MAPT	SQSTM1
GRID2	GRIK2
CSNK2A1	CTNNB1
CSNK2A1	SNCA
CSNK2A1	STX1A
CSNK2A1	TP53
CSNK2A1	PPP1R2
CSNK2A1	PAK1
CSNK2A1	PPP1R1B
CSNK2A1	CDC37
CSNK2A1	YWHAB
CSNK2A1	HIF1A
CSNK2A1	TH
CSNK2A1	SQSTM1
CSNK2A1	MAPT
CSNK2A1	MAPK1
EFNA4	EPHA4
EFNA5	EPHA4
EFNA5	SRC
EFNA5	GRIP1
EFNA1	EPHA4
EFNA3	EPHA4
RPS6KA3	SRC
PPARG	MAPK1
PPARG	RANBP9
PPARG	RB1
PPARG	GRIP1
PPARG	PDIA2
PPARG	MAP2K1
PPARG	PRKCA
PPARG	STUB1
SET	CDK5R1
SET	TP53
PRKCZ	SRC
PRKCZ	YWHAB
PRKCZ	SQSTM1
PRKCZ	MAPK3
PRKCZ	MAPK1
PRKCZ	MAP2K1
PRKCZ	PSEN1
PRKCZ	YWHAZ
PRKCZ	STUB1
STXBP1	CDK5R1
STXBP1	SQSTM1
CHAT	PRKCA
CHAT	NEDD9
CHAT	PRKCB
CHAT	PRKCG
CHAT	PRKCE
CHAT	PRKCZ
CHAT	PRKCD
PRKCG	YWHAB
PRKCG	STXBP1
PRKCG	PICK1
SQSTM1	CDC37
APP	HTRA2
APP	PSEN1
APP	COL4A1
APP	CDK5
APP	LAMA1
APP	SNCA
APP	CASP8
APP	DAB1
APP	GSK3B
APP	SET
APP	CDK16
APP	DCX
APP	STXBP1
APP	EPB41L2
APP	GAK
APP	CDKN1A
APP	MRPL28
APP	RNF32
APP	NEDD9
APP	CSNK1D
APP	DNAJB1
APP	CSNK2A1
APP	NME3
APP	RPL34
APP	FGFR2
APP	YWHAB
APP	CDK5R1
APP	PRKCD
APP	NOL12
APP	PAK1
APP	YWHAZ
APP	SSTR2
APP	H1F0
APP	ATPAF2
APP	SRPK2
APP	CCNG1
APP	CDC25A
APP	EPB41L1
APP	SOD2
APP	NDEL1
APP	PPP5C
APP	MAPK10
APP	PIKFYVE
APP	ARF6
APP	ANKS1B
APP	RPS6KA5
APP	GNA15
APP	PRKCG
APP	CACNG2
APP	EIF3F
APP	NTRK3
APP	PPARG
APP	CTNNB1
APP	CDC37
APP	MAST1
APP	MAPT
CAMK2G	TH
CAMK2G	SYN1
CAMK2G	CHAT
CAMK2G	GRIA4
CAMK2G	GRIA1
RAB4A	SOD2
RAB4A	TP53
RAB4A	GRIPAP1
SDCBP	STX1A
SDCBP	SET
SDCBP	HOMEZ
EFNB2	EPHA4
EFNB2	SDCBP
EFNB2	SRC
EFNB2	PICK1
EFNB2	HOMER1
EFNB2	GRIP1
EFNB2	PSEN1
ARF6	PIP5K1C
ARF6	EZR
ARF6	HTR2A
HOMER1	TANC1
HTR2A	ANKS1B
HTR2A	EIF3F
HTR2A	NTRK3
HTR2A	MRPL28
HTR2A	PON2
HTR2A	MAP1A
HTR2A	JAK2
HTR2A	RPS6KA3
HTR2A	NME3
HTR2A	NDUFB10
HTR2A	PPP5C
STX1A	STXBP1
MET	SRC
MET	RANBP9
MET	FZR1
MET	TP53
DLG1	MAP1A
DLG1	TANC1
DLG1	CACNG2
DLG1	PARK2
DLG1	GRIN2A
DLG1	EZR
DLG1	GRIK2
DLG1	GRIA1
SSTR1	SSTR5
SST	SSTR1
SST	SSTR2
SST	SSTR3
SST	SSTR4
SST	SSTR5
SST	PDIA2
SSTR3	TP53
EPB41L1	YWHAZ
EPB41L1	YWHAB
EPB41L1	GRIA4
EPB41L1	GRIA1
EPB41L1	SRPK2
EPB41L2	GRIA1
EPB41L2	YWHAZ
MAPK10	TP53
GRIA4	PICK1
GRIA4	PRKCA
GRIA4	PRKCG
GRIA4	PRKACA
GRIA4	SDCBP
GRIA4	CACNG2
GRIA4	GRIP1
ADRB2	GNA11
ADRB2	GNA15
ADRB2	PRKCD
ADRB2	SRC
ADRB2	HTR4
ADRB2	NEDD4
ADRB2	GNAI2
FGFR3	SRPK2
FGFR3	RPS6KA3
FGFR1	NEDD4
FGFR1	RPS6KA3
JAK2	IKBKG
MBP	RPS6KA5
MBP	PRKCZ
MBP	MAPK3
MBP	PAK1
MBP	MAPK1
MBP	PRKCA
MBP	PRKCD
MBP	PRKACA
MBP	SQSTM1
MBP	PRKCB
HIST1H1B	RPS6KA5
HIST1H1B	PRKCA
HIST1H1B	PRKCD
HIST1H1B	PRKCB
HIST1H1B	PRKCZ
IKBKG	CDC37
PURA	RB1
MEF2A	HAND1
CTNNB1	EZR
CTNNB1	FYN
CTNNB1	GRIK2
CTNNB1	SRC
CTNNB1	CDK5R1
CTNNB1	GSK3B
CTNNB1	MET
CTNNB1	PICK1
CTNNB1	HIF1A
CTNNB1	PSEN1
CTNNB1	UBE2D1
CTNNB1	PRKCG
EPHA4	NGEF
EPHA4	ARHGEF15
EPHA4	FGFR1
EPHA4	FGFR2
EPHA4	FGFR3
EPHA4	FGFR4
EPHA4	FYN
EPHA4	SRC
EPHA4	IKBKG
EPHA4	TNS3
CSNK1D	TP53
CSNK1D	CTNNB1
CSNK1D	SNCA
CSNK1D	MAPT
CSNK1D	YWHAZ
CSNK1D	HIF1A
CSNK1D	PPP5C
CCNG1	TP53
CCNG1	GAK
CCNG1	CDK5
TH	YWHAZ
TH	MAPKAPK2
TH	RPS6KA5
TH	YWHAB
TH	TYSND1
AMPH	SYN1
AMPH	DNM1
AMPH	CDK5R1
AMPH	SYNJ1
AMPH	CDK5
CDK5	PPP1R2
CDK5	SET
CDK5	CDKN1B
CDK5	EZR
CDK5	FYN
CDK5	GRIN2A
CDK5	MAPT
CDK5	PCNA
CDK5	MAP2K1
CDK5	STX1A
CDK5	SRC
CDK5	ERBB3
CDK5	TP53
CDK5	DCX
CDK5	CDK16
CDK5	SYN1
CDK5	PURA
CDK5	MEF2A
CDK5	CSNK1D
CDK5	GAK
CDK5	DNM1
CDK5	PAK1
CDK5	MAPK10
CDK5	STXBP1
CDK5	DAB1
CDK5	CDK5R1
CDK5	CDK5R2
CDK5	PPP1R1B
CDK5	CDC37
CDK5	NDEL1
CDK5	PTPN2
CDK5	NES
CDK5	SYNJ1
CDK5	CDK5RAP1
CDK5	CABLES2
CDK5	CABLES1
CDK5	FSD1
CDK5	C1orf61
CDK5	CHN1
CDK5	PIP5K1C
CDK5	GSK3B
CDK5	WASF1
CDK5	PSEN1
CDK5	LMTK2
CDK5	CDK5RAP2
CDK5	PARK2
CDK5	NEDD4
CDK5	TLN1
CDK5	BAG6
CDK5	NEDD4L
CDK5	H1F0
CDK5	RPL34
CDK5	RB1
CDK5	KIF26B
CDK5	MBP
CDK5	HTRA2
CDK5	MAST1
CDK5	RNF32
CDK5	CDKN1A
CDK5	HIST1H1B
CDK5	PPARG
CDK5	FZR1
CDK5	YBX3
CDK5	PIKFYVE
GRIN2A	PRKCA
GRIN2A	SRC
GRIN2A	NEDD4
FYN	NEDD9
FYN	HRAS
FYN	PRKCD
FYN	PRKCE
FYN	PRKCZ
FYN	GRIN2A
FYN	JAK2
FYN	MAPT
FYN	SNCA
FYN	WASF1
FYN	SRC
FYN	NEDD4
FYN	RPS6KA3
PARK2	SNCA
PARK2	STUB1
PARK2	PICK1
PARK2	IKBKG
PARK2	SQSTM1
PARK2	TP53
PARK2	UBE2D1
NEDD4	RPS6KA3
NEDD4	SNCA
NEDD4	CDK5R1
NEDD4	TRPV6
NEDD4	UBE2D1
NEDD4	PPARG
NEDD4	RPS3A
NEDD4	SRC
NEDD4	PIP5K1C
CDK16	YWHAZ
CDK16	PRKACA
CDK16	CDK5R1
CDK5R1	NES
CDK5R1	CDK5RAP2
CDK5R1	CDK5RAP1
CDK5R1	LMTK2
CDC37	RNF32
MAST1	RNF32
PIP5K1C	HDHD2
SNCA	TH
SNCA	YWHAB
SNCA	SQSTM1
SNCA	STUB1
SNCA	SYN1
SNCA	SRC
SNCA	NEDD4L
SNCA	PDIA2
GNA11	HTR2A
GNA15	CXCR2
GNA15	PRKCA
PPP5C	CDC37
SRPK2	YWHAB
SRPK2	CACNG2
SRPK2	YBX3
SRPK2	SLC17A6
SRPK2	TNS3
SRPK2	USP36
CDC25B	CSNK2A1
CDC25B	CREBBP
CDC25B	YWHAZ
CDC25B	YWHAB
CDC25B	MAPKAPK2
CDC25B	CDK5
CDC25C	HRAS
CDC25C	PCNA
CDC25C	TP53
CDC25C	YWHAZ
CDC25C	YWHAB
CDC25C	NEDD4
CDC25C	MAPK3
CDC25C	MAPK1
CDC25C	CDK5
CDC25C	LMTK2
CDC25C	ERBB3
DNAJB1	STUB1
DNAJB1	CDC37
DNAJB1	MAST1
UBE2D1	STUB1
UBE2D1	FZR1
UBE2D1	NEDD4L
GRIA1	GRID2
GRIA1	SQSTM1
GRIA1	HSPA5
GRIA1	GRIK2
GRIA1	GRIA4
GRIA1	CXCR2
GRIA1	PRKCA
GRIA1	GRIPAP1
GRIA1	PRKACA
GRIA1	SDCBP
GRIA1	CACNG2
GRIA1	HOMER1
GRIA1	TRPC1
GRIA1	PICK1
GRIA1	TANC1
GRIA1	GRIP1
GRIA1	USP46
GRIA1	NEDD4L
PPP1R2	LMTK2
GNAI2	CXCR2
GNAI2	MTNR1B
EFNB3	EPHA4
EFNB3	YWHAZ
FGFR4	FZR1
FGFR4	MET
FGFR4	HIF1A
FGFR4	TP53
GRIK2	SDCBP
GRIK2	PICK1
GRIK2	GRIP1
CALB1	IMPA1
CALB1	RANBP9
CALB1	TRPV5
CALB1	TRPV6
CALB1	IKBKG
CDK11B	PAK1
CDK11B	YWHAB
CDK11B	TH
CDK11B	EIF3F
CDK11B	YWHAZ
CDK11B	RANBP9
CACNA1D	FGFR2
CACNA1D	STX1A
CACNA1D	CALB1
GNAI1	MTNR1B
GNAI1	WASF1
GNAI1	HTR2A
GNAI1	SSTR2
GNAI1	SSTR3
CNR1	GNAI1
CNR1	GNA15
CNR1	GNAI2
CNR1	GNAI3
CNR1	HCRTR1
CNR1	MET
CDKN1A	CSNK2A1
CDKN1A	PCNA
CDKN1A	RB1
CDKN1A	SET
CDKN1A	C7orf20
CDKN1A	IKBKG
CDKN1A	TP53
CDKN1A	BAG6
CDKN1A	UBE2D1
CDKN1A	HIST1H1B
CDKN1A	STUB1
CDKN1A	PRKACA
CDH8	CTNNB1
CDC25A	HRAS
CDC25A	YWHAZ
CDC25A	YWHAB
CDC25A	FZR1
CDC25A	SRC
CDC25A	CDK5
SOD2	HDHD2
SOD2	C7orf20
SOD2	KIAA1549
SOD2	NOL12
SOD2	USP36
SOD2	CYP4F12
CHN1	RPS3A
CHN1	CDK5R1
ARF1	PICK1
ARF1	HTR2A
PSEN1	CDC37
PSEN1	RNF32
EBF1	PAX5
EBF1	ZNF423
EBF1	ZNF521
EBF1	HOMEZ
EBF1	ATPAF2
EBF1	MTNR1B
EBF1	ERO1L
NQO1	TP53
NQO1	HSPA1A
NQO1	DNAJB1
NQO1	ING1
NQO1	STUB1
NQO1	UBE2D1
NQO1	HIF1A
CCND2	CDKN1A
CCND2	CDKN1B
CCND2	CDK5
CCND2	RB1
CCND2	FGFR4
CCND2	MET
CCND2	FZR1
CCND2	HIF1A
GLUL	HTR2A
H1F0	IKBKG
H1F0	NEDD4L
H1F0	PRKCB
GRIP1	GRIPAP1
MTNR1B	YWHAB
MTNR1B	TLN1
ALAS1	CDK5
ALAS1	CDKN1A
RPL34	SRPK2
